# Supplementary material for: Synthesis of a chiral dinuclear Cu(ii)-benzothiazolamine complex: evidence of cuprophilic interaction in its structure and exploration of its electrochemical properties and catalytic performance
Source: Royal Society of Chemistry journal article supplement (doi:10.1039/d3dt02994h), 2023-10-19

## Supporting Information for

Synthesis of a chiral dinuclear Cu(II)-benzothiazolamine complex:  
evidence of cuprophilic interaction in its structure, exploration of  
its electrochemical property, and catalytic performance.

**O. Stephen Ojo\***, Halilu Sale, Mark D. Symes and Claire Wilson

WestCHEM, School of Chemistry, The Joseph Black Building, University of Glasgow,  
Glasgow, G12 8QQ, United Kingdom.

\*Corresponding author

Telephone: +44 (0)141 330 6334

Email: Oluwarotimi.Ojo@glasgow.ac.uk

## General Methods

### Synthesis:

All reagents were obtained from commercial sources and used as received. All solvents were analytical grade and used as purchased. Brine refers to a saturated aqueous solution of sodium chloride. Flash column chromatography was performed using silica gel 60Å (35–70 μm). Merck Kieselgel aluminium-backed plates precoated with silica gel 60Å F254 were used for thin-layer chromatography (TLC) and were visualised by ultraviolet light (254 nm) and/or heating the plate after staining with vanillin or potassium permanganate (KMnO<sub>4</sub>). The <sup>1</sup>H NMR spectra were recorded on Bruker Avance III HD 500 (500 MHz) or Avance III HD 400 (400 MHz) ultrashield™ spectrometers and data are reported as follows: chemical shift (δ<sub>H</sub>) in ppm relative to tetramethylsilane as the internal standard (CDCl<sub>3</sub>, δ 7.26 ppm; DMSO-*d*<sub>6</sub> δ 2.50 ppm), multiplicity (s = singlet, d = doublet, t = triplet, q = quartet, m = multiplet or overlap of non-equivalent resonances), and integration. The <sup>13</sup>C NMR spectra were recorded on NMR spectrometer at either 101 or 126 MHz and data are reported as follows: chemical shift (δ<sub>C</sub>) in ppm relative to tetramethylsilane or the solvent as an internal standard (CDCl<sub>3</sub>, δ 77.16 ppm; DMSO-*d*<sub>6</sub> δ 39.5 ppm). The multiplicity of each carbon with respect to hydrogen was deduced from DEPT (Distortionless Enhancement by Polarization Transfer) 135 experiments, which determined whether they are C, CH, CH<sub>2</sub>, or CH<sub>3</sub>. All the <sup>13</sup>C and <sup>19</sup>F NMR were run and reported as hydrogen decoupled. The infrared spectra were recorded on a Perkin Elmer FT-IR spectrometer using neat samples; Wavelengths of maximum absorbance (*v*<sub>max</sub>) are quoted in wavenumbers (cm<sup>-1</sup>). Only selected, characteristic IR absorption data are provided for each compound. The mass spectra were recorded using electron ionisation (EI) or electrospray ionisation (ESI) techniques. The parent ion [M]<sup>+</sup>, [M+H]<sup>+</sup> or [M+Na]<sup>+</sup> is calculated to 4 decimal places from the molecular formula, and all values are within a tolerance of 5 ppm. Elemental analysis, mass spectrometer analysis and x-ray analysis were run by school of chemistry, University of Glasgow analytical service team.

**Electrochemical measurement:**

A Gamry potentiostat (Gamry Instruments, interface 1010E) was used to carry out cyclic voltammetry tests. The electrochemical measurements were undertaken using a conventional three-electrode glass cell consisting of working, counter, and reference electrodes. The working electrode was a glassy carbon (BASi, diameter = 3.0 mm) having a surface area of 0.071 cm<sup>2</sup>, while the counter electrode was a platinum foil. A saturated calomel electrode (SCE) was used as the reference electrode, and all potentials were measured with respect to the SCE. The glassy carbon electrode was polished by applying a 0.05 μm alumina suspension (BASi) onto an alumina polishing pad to achieve a fresh surface. Subsequently, the electrode was thoroughly washed with distilled water. The cyclic voltammetry experiments were conducted in the presence of 0.01 M Cu(II) or Cu(I) complexes in CH<sub>3</sub>OH (Honeywell, 99.7% purity), 0.1 M tetraethylammonium chloride (Sigma-Aldrich, 97.0% purity) was used as a supporting electrode, at room temperature (~25 °C) after purging the solution for 20 minutes to remove any dissolved oxygen from the system.

**Thermal measurement (TGA and DSC):**

Thermogravimetric analysis (TGA) was gathered as follows: DT Q600 , manufactured by TA Instruments; ramp from RT to 300 °C at 10°/min in 100ml/min Argon.

Differential Scanning Calorimetry (DSC) was gathered as follows: Discovery DSC 25, manufactured by TA Instruments; ramp from RT to (temperature below decomposition temperature found by TGA) at 10°/min.

**Elemental Analysis (EA):**

All samples were measured on the CE-440 Elemental Analyzer by Exeter Analytical Inc., Version 10.03.21DDSA. Standard running conditions are combustion temperature (975 °C +/- 10°C), reduction temperature (620 °C +/- 20 °C), oven temperature (80 °C +/- 2 °C), purge time (60 seconds), combustion time (60 seconds), helium outlet pressure (~1.0 bar to give Fill time of 30–50 sec), oxygen outlet pressure (~1.3 bar).

## Synthesis of benzothiazole-2-amines, L1 and L2

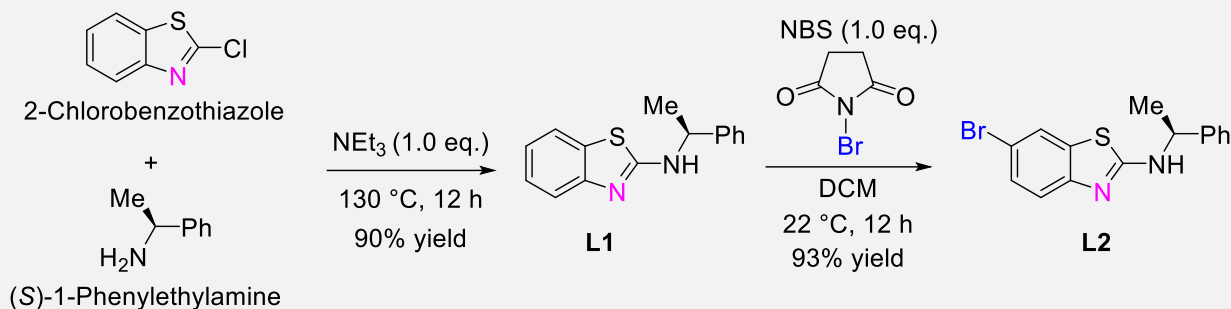

### N-[(1S)-1-Phenylethyl]-2-benzothiazolamine (L1)

2-chlorobenzothiazole (2.30 mL, 3.00 g, 17.6855 mmol, 1.0 eq.) was added to a stirring mixture of (S)-1-phenylethylamine (2.14 g, 17.6855 mmol, 1.0 eq.) and  $\text{NEt}_3$  (2.28 mL, 1.79 g, 17.6855 mmol, 1.0 eq.) in a 50 mL round bottom flask. The resulting mixture was heated to 130 °C and left to stir at this temperature for 12 h. Afterwards, the viscous mixture was allowed to cool to 40 °C then immediately diluted with saturated aqueous solution of ammonium chloride (100 mL) and extracted with DCM (60 mL) twice. The combined organic layers were washed with brine (30 mL), dried with  $\text{MgSO}_4$ , filtered and solvent removed *in vacuo*. The crude sample was recrystallised in hexane. Vacuum filtration provided **L1** (4.05 g, 15.9169 mmol, 90%) as a white crystalline solid.  $\text{NEt}_3$  = Triethylamine.  **$^1\text{H NMR}$**  (400 MHz,  $\text{DMSO-}d_6$ )  $\delta$  8.52 (d,  $J$  = 7.7 Hz, 1H, *N*-H), 7.64 (dd,  $J$  = 7.7, 1.3 Hz, 1H), 7.39–7.42 (m, 2H), 7.31–7.35 (m, 3H), 7.16–7.25 (m, 2H), 6.99 (d,  $J$  = 7.7, 1.3 Hz, 1H), 5.04 (p,  $J$  = 7.0 Hz, 1H), 1.49 (d,  $J$  = 7.0 Hz, 3H).  **$^{13}\text{C NMR}$**  (101 MHz,  $\text{DMSO-}d_6$ )  $\delta$  165.3, 152.4, 144.4, 130.2, 128.3, 126.8, 125.9, 125.4, 120.8, 118.0, 53.3, 23.1. **IR** (neat)  $\nu_{\text{max}}$  ( $\text{cm}^{-1}$ ): 2966, 1601, 1568, 1552, 1443. **HRMS** (ESI): calc for  $\text{C}_{15}\text{H}_{14}\text{N}_2\text{S}$   $m/z$ : 254.0878 found  $[\text{M}+\text{H}]^+$  255.0956. **MP**: 130–132 °C.

### 6-Bromo-*N*-[(1*S*)-1-phenylethyl]-2-benzothiazolamine (**L2**)

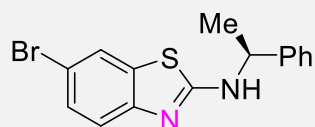

NBS (1.34 g, 7.5521 mmol, 1.0 eq.) was added to a stirring solution of (*S*)-**L1** (1.92 g, 7.5521 mmol, 1.0 eq.) in DCM (30 mL) at room temperature and left to stir for 12 h (the mixture immediately turned red, then after 1 h turned light brown). Afterwards, the mixture was washed with saturated aqueous solution of sodium hydrogen carbonate (35 mL) and the aqueous layer was further extracted with DCM (40 mL). The combined organic layers were washed with brine (35 mL), dried with MgSO<sub>4</sub>, filtered and solvent removed *in vacuo* to generate (*S*)-**L2** (2.35 g, 7.049 mmol, 93%) as a brown solid. NBS = *N*-bromosuccinimide, DCM = Dichloromethane. **<sup>1</sup>H NMR** (400 MHz, DMSO-*d*<sub>6</sub>) δ 8.65 (d, *J* = 7.7 Hz, 1H, *N*-H), 7.89 (s, 1H), 7.38–7.41 (m, 2H), 7.30–7.35 (m, 3H), 7.21–7.26 (m, 2H), 5.03 (p, *J* = 7.0 Hz, 1H), 1.48 (d, *J* = 7.0 Hz, 3H). **<sup>13</sup>C NMR** (101 MHz, DMSO-*d*<sub>6</sub>) δ 165.8, 151.6, 144.1, 132.4, 128.39, 128.34, 126.9, 125.9, 123.3, 119.4, 112.1, 53.4, 23.0. **IR** (neat)  $\nu_{\text{max}}$  (cm<sup>-1</sup>): 2969, 1594, 1555, 1443, 1254. **HRMS** (ESI): calc for C<sub>15</sub>H<sub>13</sub>N<sub>2</sub>S<sup>79</sup>Br *m/z*: 331.9983 found [M+H]<sup>+</sup> 333.0061. **MP**: 120–122 °C.

## Scheme S1: Synthesis of Complexes A-E

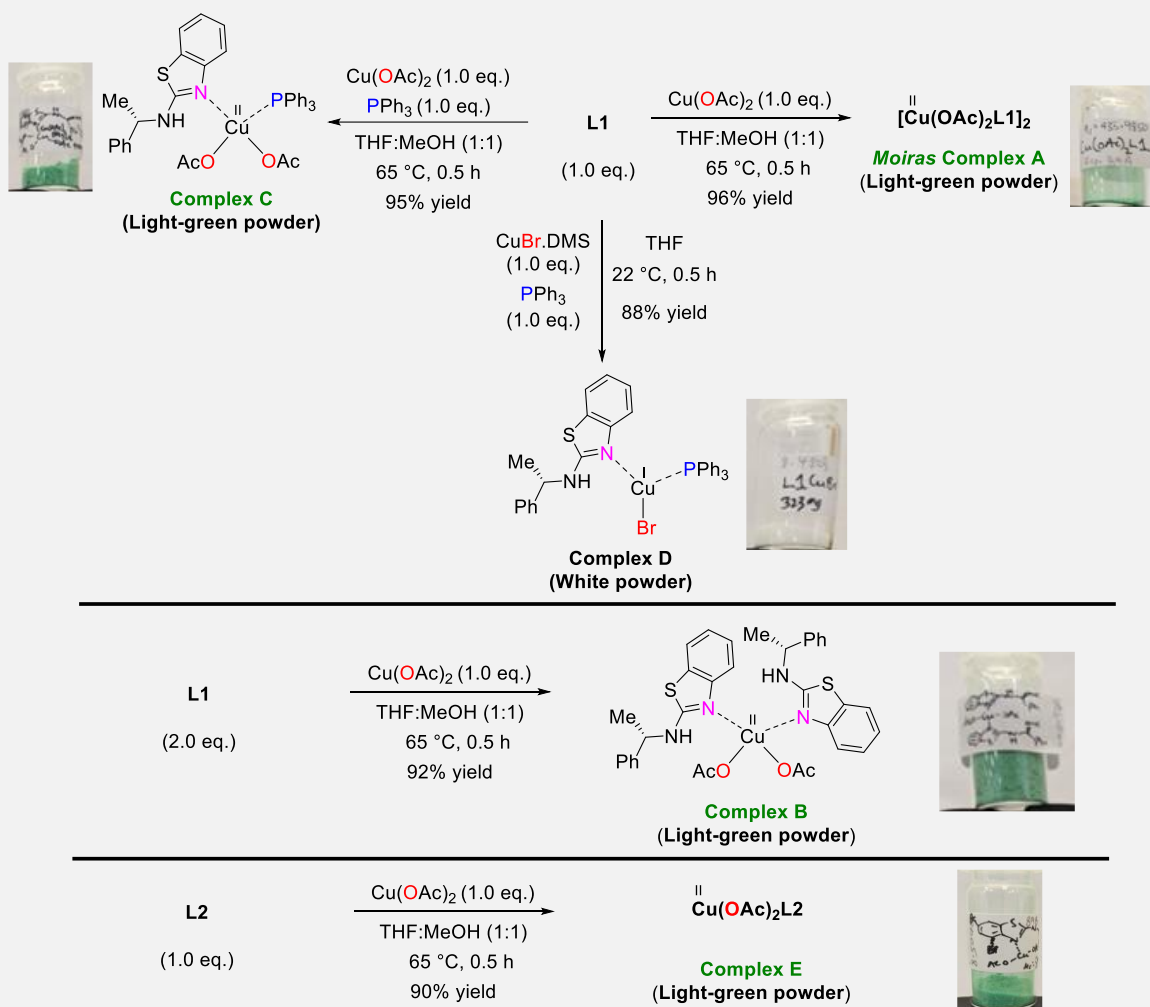

**tris( $\mu$ -acetato)-( $\mu$ -acetato)-bis[*N*-(1-phenylethyl)-1,3-benzothiazol-2-amine]-di-copper – Moiras Complex A**

A colourless solution of (*S*)-**L1** (0.21 g, 0.8259 mmol, 1.0 eq.) in THF (5 mL) was added to a stirring deep blue solution of Cu(OAc)<sub>2</sub> (0.15 g, 0.8259 mmol, 1.0 eq.) in MeOH (5 mL) at room temperature. The resulting reaction mixture was heated to 65 °C and left to stir at this temperature for 0.5 h. Afterwards, the mixture was allowed to cool to room temperature, and solvent was removed *in vacuo*. The resulting light-green powder was washed with hexane and collected by vacuum filtration. **Moiras complex A** (0.35 g, 0.7929 mmol, 96%) was obtained as a light-green powder. MeOH = Methanol. **IR** (neat)  $V_{\max}$  (cm<sup>-1</sup>): 1621, 1596, 1571, 1556, 1454, 1421. **Elemental Analysis**: cal. C, 52.34%; H, 4.62%; N, 6.43%; O, 14.68%; S, 7.35%, Cu, 14.58%. Observ. C, 52.34%; H, 4.62%; N, 6.43%; O, 14.68%; S, 7.35%, Cu, 14.58%.

**Complex B – Cu(OAc)<sub>2</sub>(L1)<sub>2</sub>**

A colourless solution of (*S*)-**L1** (0.42 g, 1.6518 mmol, 2.0 eq.) in THF (5 mL) was added to a stirring deep blue solution of Cu(OAc)<sub>2</sub> (0.15 g, 0.8259 mmol, 1.0 eq.) in MeOH (5 mL) at room temperature. The resulting reaction mixture was heated to 65 °C and left to stir at this temperature for 0.5 h. Afterwards, the mixture was allowed to cool to room temperature, and solvent was removed *in vacuo*. The resulting green powder was washed with hexane and collected by vacuum filtration. **Complex B** (0.52 g, 0.7598 mmol, 92%) was obtained as a light-green powder (0.52 g, 0.7598 mmol, 92%). **IR** (neat)  $V_{\max}$  (cm<sup>-1</sup>): 1624, 1596, 1557, 1453, 1424. **Elemental Analysis**: cal. C, 59.16%; H, 4.96%; N, 8.12%; O, 9.27%; S, 9.29%; Cu, 9.21%. Observ. C, 59.16%; H, 4.96%; N, 8.12%; O, 9.27%; S, 9.29%, Cu, 9.21%.

### Complex C – Cu(OAc)<sub>2</sub>L1PPh<sub>3</sub>

Cu(OAc)<sub>2</sub> (0.15 g, 0.8259 mmol, 1.0 eq.) was added, all at once, to a stirring colourless solution of (S)-**L1** (0.21 g, 0.8259 mmol, 1.0 eq.) and PPh<sub>3</sub> (0.22 g, 0.8259 mmol, 1.0 eq.) in THF (5 mL) and MeOH (5 mL) at room temperature. The resulting reaction mixture was heated to 65 °C and left to stir at this temperature for 0.5 h. Afterwards, the mixture was allowed to cool to room temperature, and solvent was removed *in vacuo*. The resulting green powder was washed with hexane and collected by vacuum filtration.

**Complex C** (0.55 g, 0.7846 mmol, 95%) was obtained as a light-green powder. PPh<sub>3</sub> = Triphenylphosphine. <sup>31</sup>P NMR (162 MHz, CDCl<sub>3</sub>): δ -2.65. IR (neat) V<sub>max</sub> (cm<sup>-1</sup>): 1624, 1596, 1558, 1452, 1420. **Elemental Analysis**: calc. C, 63.64%; H, 5.05%; N, 4.01%; O, 9.16%, P, 4.44%; S, 4.59%; Cu, 9.1%. Observ. C, 63.64%; H, 5.05%; N, 4.01%; O, 9.16%; P, 4.44%; S, 4.59%; Cu, 9.1%.

### Complex D – CuBrL1PPh<sub>3</sub>

CuBr.DMS (0.40 g, 1.9656 mmol, 1.0 eq.) was added, all at once, to a stirring colourless solution of (S)-**L1** (0.50 g, 1.9656 mmol, 1.0 eq.) and PPh<sub>3</sub> (0.52 g, 1.9656 mmol, 1.0 eq.) in THF (15 mL) at room temperature left to stir for 0.5 h. Afterwards, the mixture was allowed to cool to room temperature, and solvent was removed *in vacuo*. The resulting white fluffy powder was rinsed with hexane and collected by vacuum filtration.

**Complex D** (1.14 g, 1.7297 mmol, 88%) was obtained as a white solid. PPh<sub>3</sub> = Triphenylphosphine. <sup>1</sup>H NMR (400 MHz, CDCl<sub>3</sub>) δ 8.83 (s, 1H, N-H), 7.53–7.57 (m, 6H), 7.42–7.44 (m, 3H), 7.34–7.39 (m, 4H), 7.26–7.33 (m, 9H), 6.94–7.02 (m, 2H), 4.49 (q, J = 6.8 Hz, 1H), 4.49 (d, J = 6.8 Hz, 3H). <sup>13</sup>C NMR (101 MHz, CDCl<sub>3</sub>) δ 170.0, 150.1, 142.6, 134.2, 134.1, 133.0, 132.6, 129.9, 128.9, 128.7, 128.6, 127.7, 126.4, 126.0, 121.8, 120.8, 119.3, 57.0, 24.4. <sup>31</sup>P NMR (162 MHz, CDCl<sub>3</sub>): δ -4.60. IR (neat) V<sub>max</sub> (cm<sup>-1</sup>): 1548, 1449, 1432, 1092. **HRMS** (ESI): calc for C<sub>33</sub>H<sub>29</sub>N<sub>2</sub>Cu<sup>79</sup>BrPS *m/z*: 658.0268 found [M+H]<sup>+</sup> 659.0346. **Elemental Analysis**: cal. C, 60.05%; H, 4.43%; N, 4.24%; Br, 12.10%; P, 4.69%; S, 4.86%, Cu, 9.63%. Observ. C, 60.05%; H, 4.43%; N, 4.24%; Br, 12.10%; P, 4.69%; S, 4.86%, Cu, 9.63%.



### **Complex E – Cu(OAc)<sub>2</sub>L2**

A colourless solution of (*S*)-**L2** (0.28 g, 0.8259 mmol, 1.0 eq.) in THF (5 mL) was added to a stirring deep blue solution of Cu(OAc)<sub>2</sub> (0.15 g, 0.8259 mmol, 1.0 eq.) in MeOH (5 mL) at room temperature. The resulting reaction mixture was heated to 65 °C and left to stir at this temperature for 0.5 h. Afterwards, the mixture was allowed to cool to room temperature, and solvent was removed *in vacuo*. The resulting green powder was washed with hexane and collected by vacuum filtration. **Complex E** (0.38 g, 0.7433 mmol, 90%) was obtained as a light-green powder. **IR** (neat)  $\nu_{\max}$  (cm<sup>-1</sup>): 1622, 1593, 1561, 1549, 1450, 1420. **Elemental Analysis**: cal. C, 44.32%; H, 3.72%; N, 5.44%; Br, 15.52%; O, 12.43%; S, 6.23%, Cu, 12.34%. **Observ.** C, 44.32%; H, 3.72%; N, 5.44%; Br, 15.52%; O, 12.43%; S, 6.23%, Cu, 12.34%.

**Solvent coordination effect:** Tetrahydrofuran (THF) vs Toluene (PhMe)

The behaviour of these copper complexes in THF and PhMe suggests that THF (polar coordinating solvent) is included in the coordination sphere of the Cu<sup>I</sup> or Cu<sup>II</sup> species.<sup>1a</sup> The colour of the Cu<sup>II</sup> complexes is green, in PhMe the colour stayed green but changed to blue in THF. The Cu<sup>I</sup> complex is white, in PhMe it stayed colourless but changed to light-gold in THF. The choice of solvent can play a crucial role in the success of some catalytic organic reaction.<sup>1b</sup> Also, a previous study has shown that solvent interaction and/or binding played a key role in the dynamic equilibrium between copper isomeric forms.<sup>1c</sup>

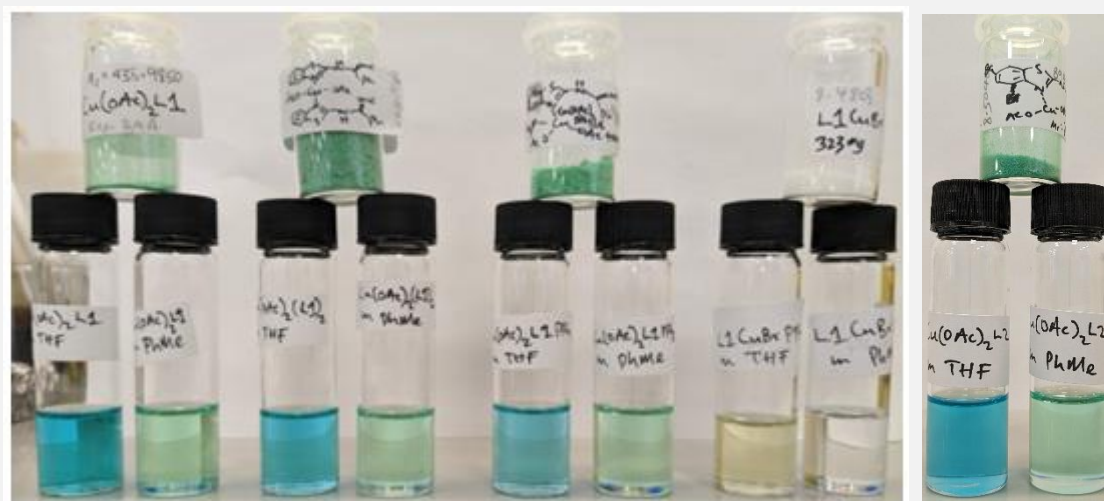

**Figure S1:** Behaviour of Copper complexes in solution

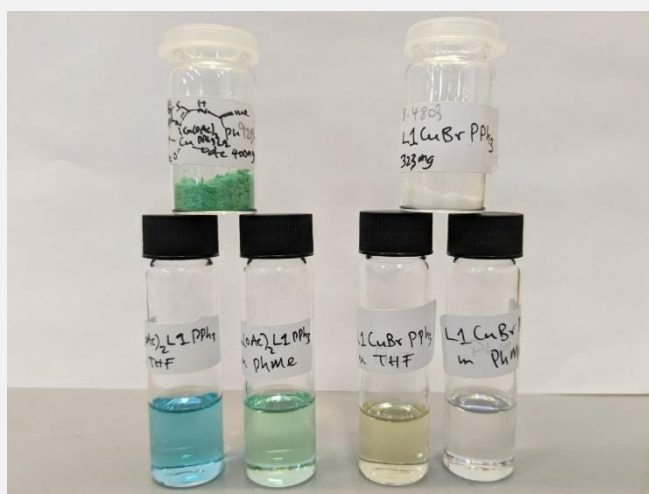

**Figure S2:** Cu<sup>II</sup> vs Cu<sup>I</sup>

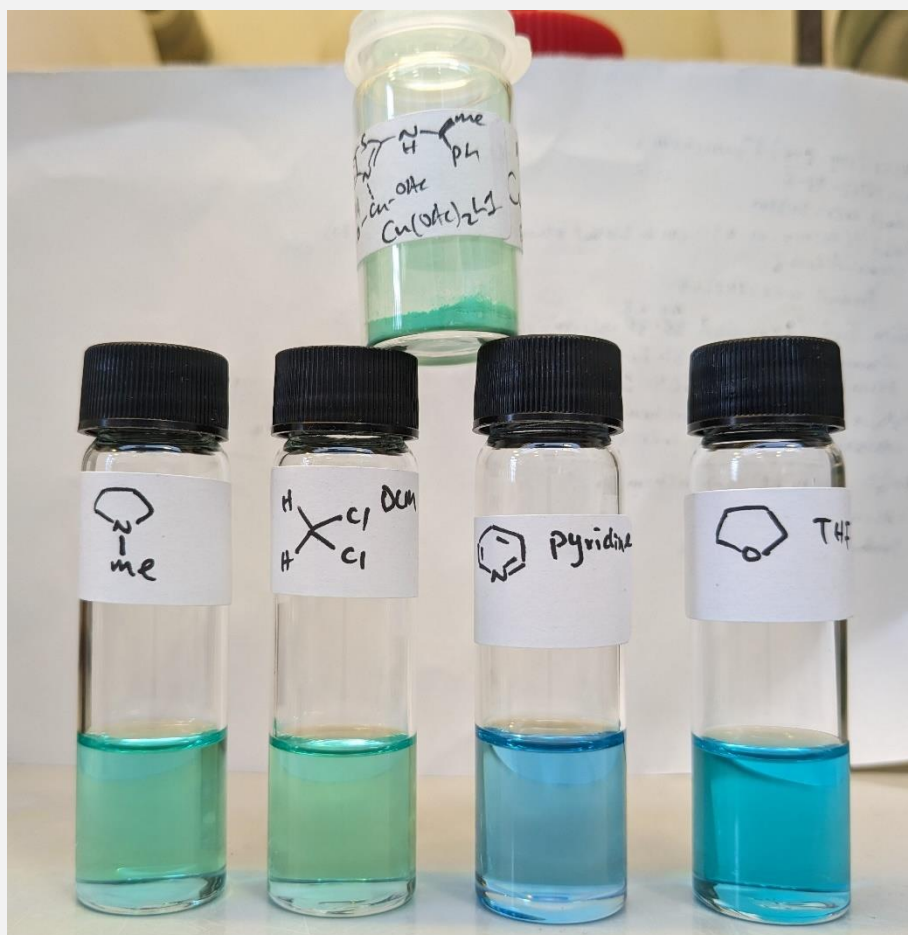

**Figure S3:** Complex **A** (10 mg) in 5 mL of solvent (1-Methylpyrrolidine, DCM, Pyridine or THF)

## Is cuprophilic interaction between Cu(II)-Cu(II) a $\delta$ -bond?

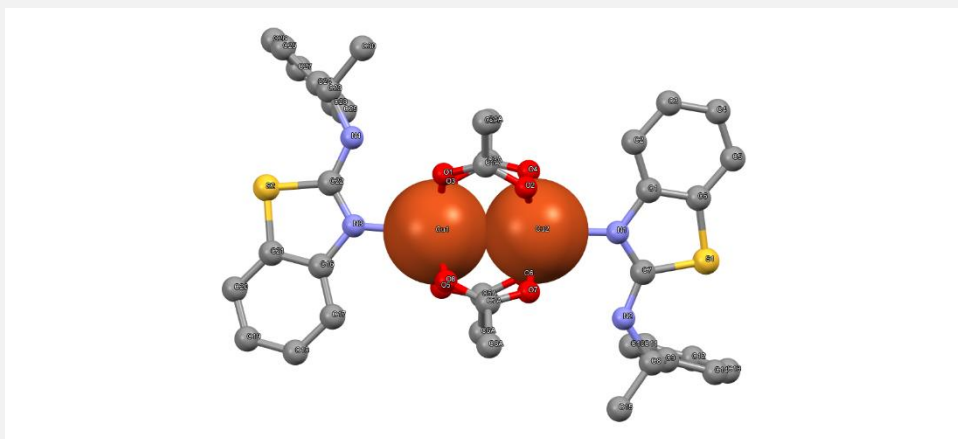

**Figure S4:** Two Cu(II) van der Waals radii in contact. Using Mercury software

When two spheres overlap with one another, it's an indication that the corresponding atoms are covalently bonded. When they are merely touching one another, their distance of separation is usually equal to the sum of their van der Waals (vdw) radii. In complex **A**, the chiral benzothiazolamine ligand makes this distance shorter than the sum of two Cu vdw radii. Cuprophilic interaction between Cu(I)-Cu(I) can't be a metal-metal  $\delta$ -bond because of full d orbitals,  $3d^{10}$ - $3d^{10}$ . However, Cu(II)-Cu(II)  $3d^9$ - $3d^9$  interaction as a  $\delta$ -bond warrants an investigation since  $3d_z^2$  (or  $3d_{x^2-y^2}$ ) orbitals is partially filled.

Origin of  $\sigma$ ,  $\pi$  and  $\delta$  bonding interactions

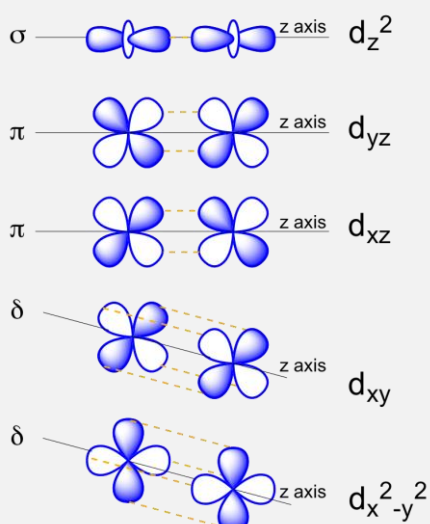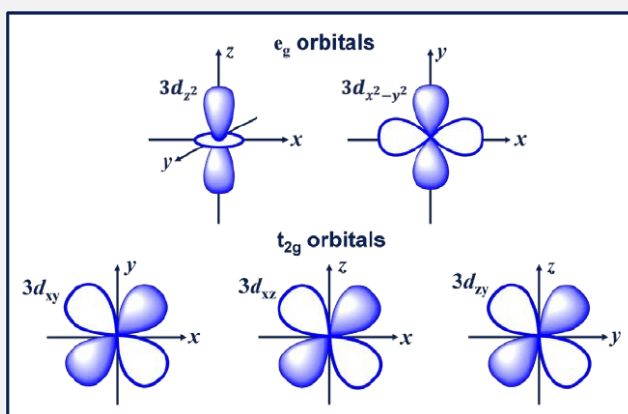

# **Thermal Properties of Complexes A-C and E**

**TGA** and **DSC** Data

# Moiras Complex A – [Cu(OAc)<sub>2</sub>L1]<sub>2</sub>

## TGA

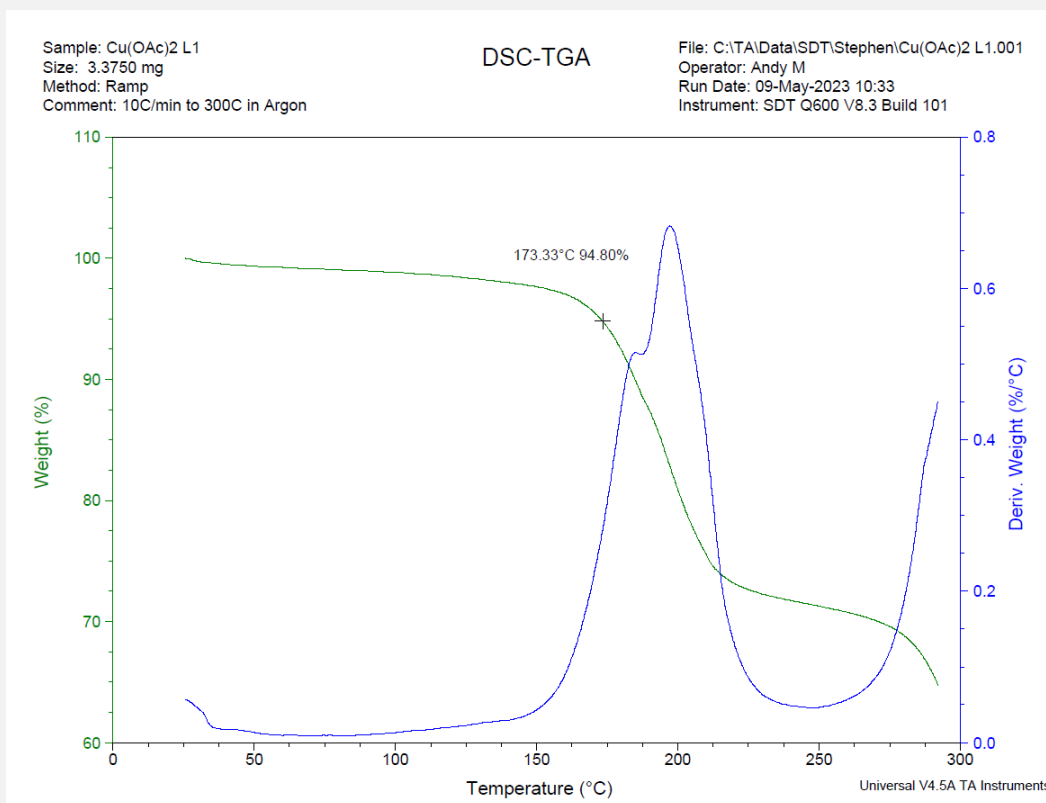

## DSC

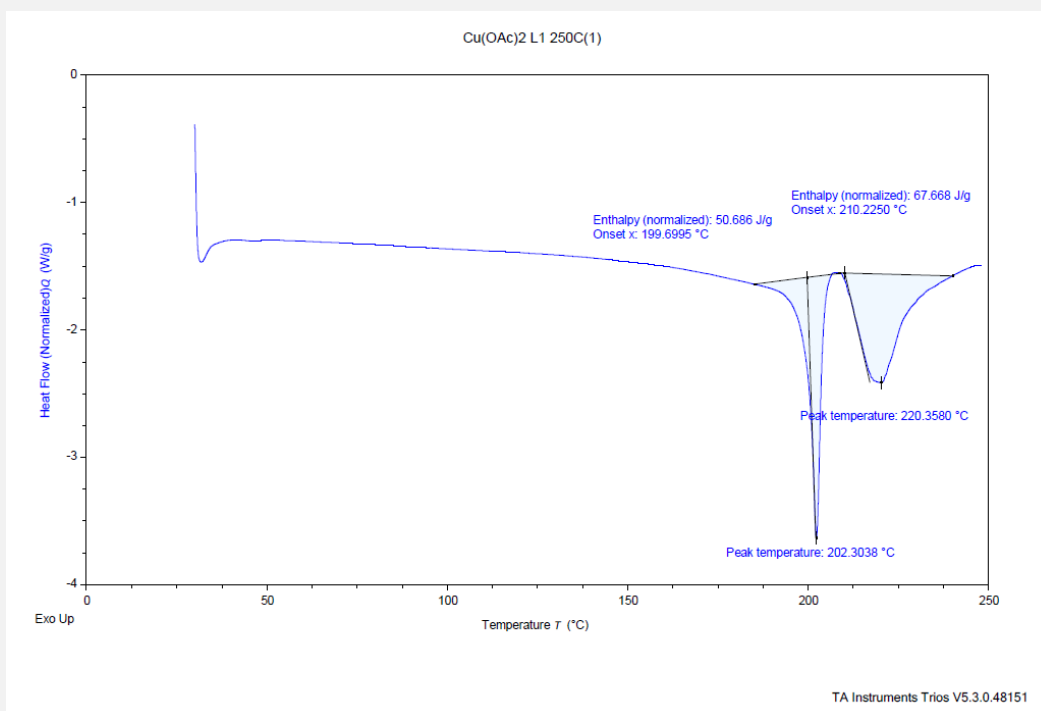

## Complex B – Cu(OAc)<sub>2</sub>(L1)<sub>2</sub>

### TGA

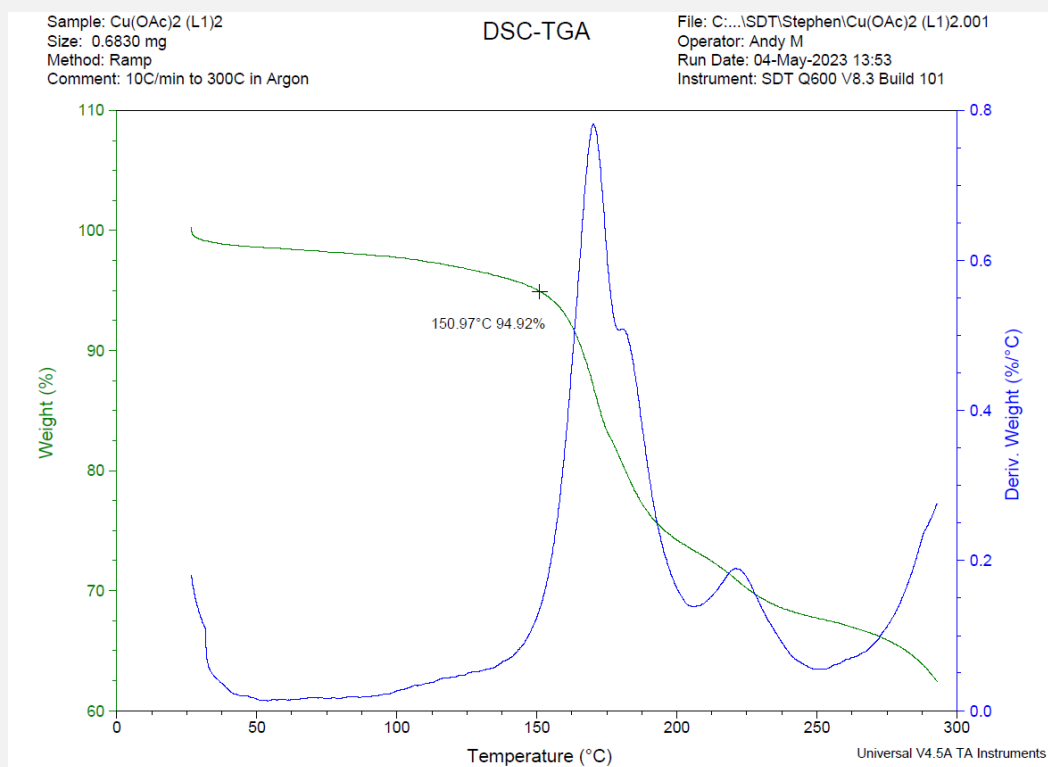

### DSC

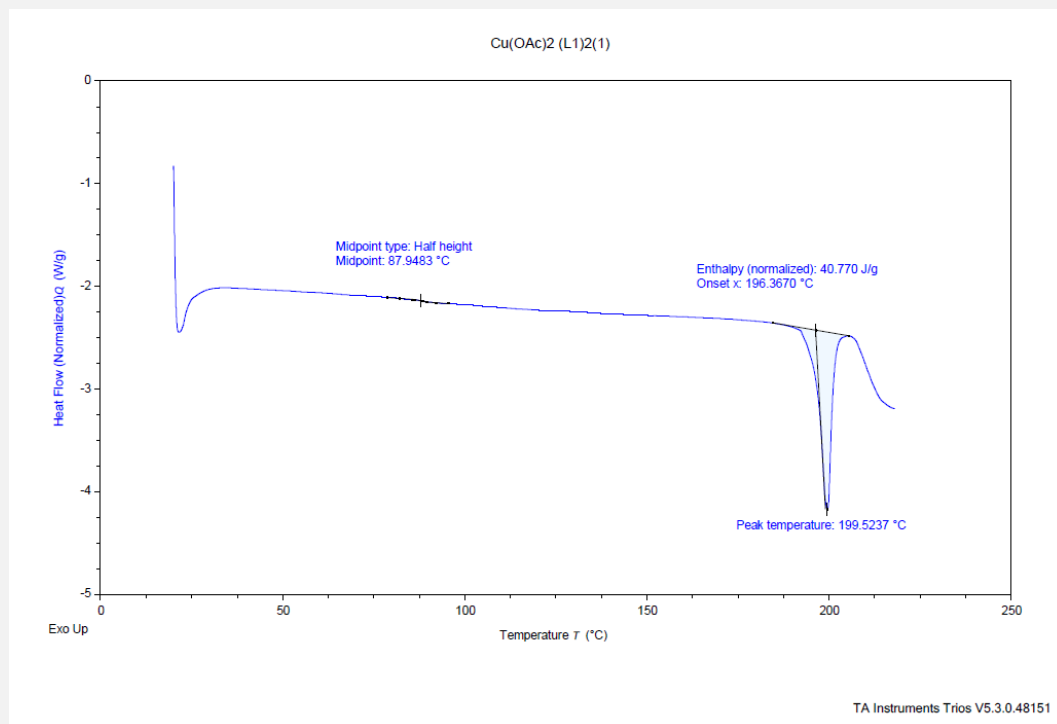

## Complex C – Cu(OAc)<sub>2</sub>L1PPh<sub>3</sub>

### TGA

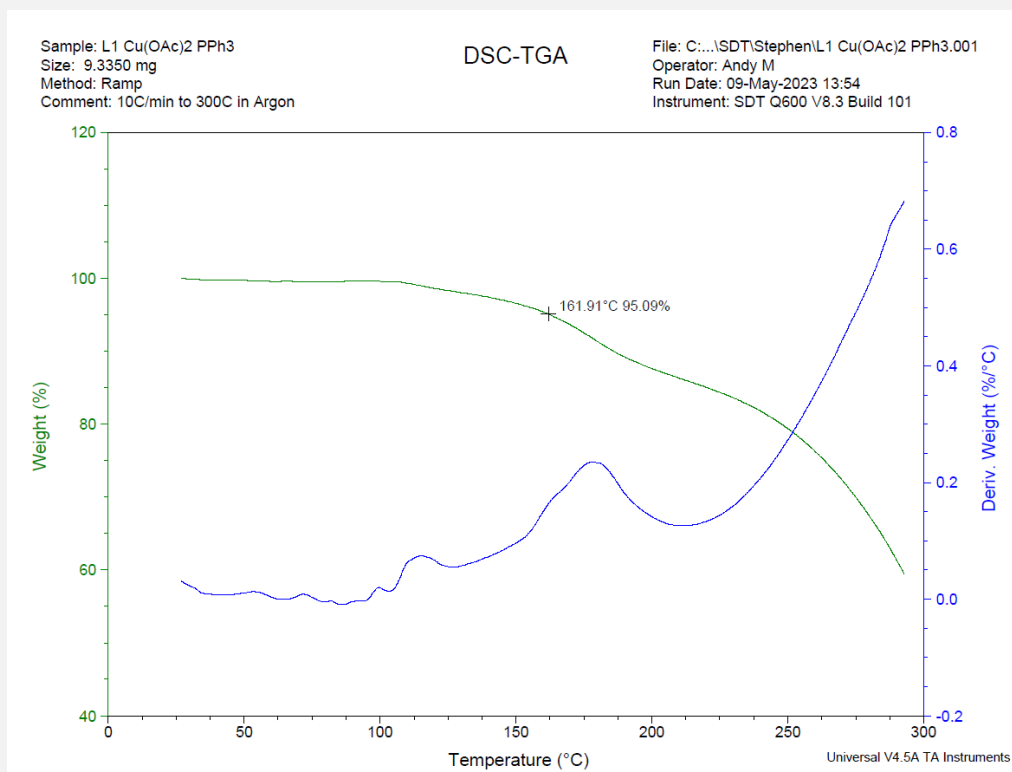

### DSC

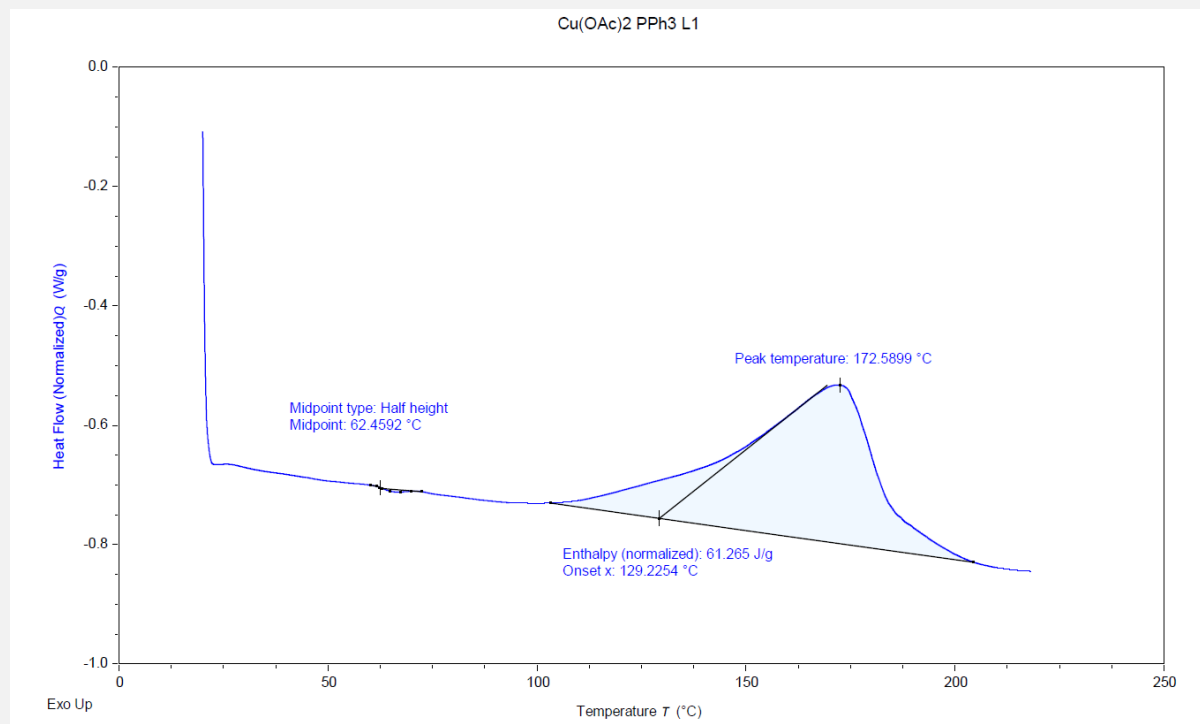

Peak at 172.5 C – indicative of exothermic reaction caused by crystallisation.



# Complex E – Cu(OAc)<sub>2</sub>L2

## TGA

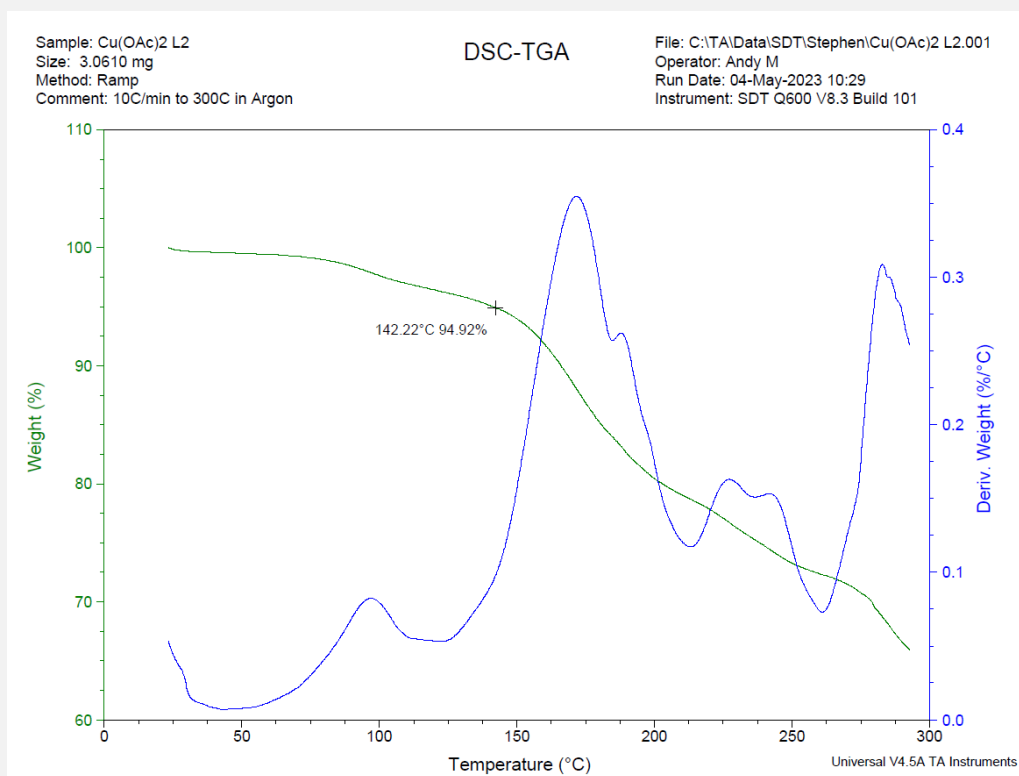

## DSC

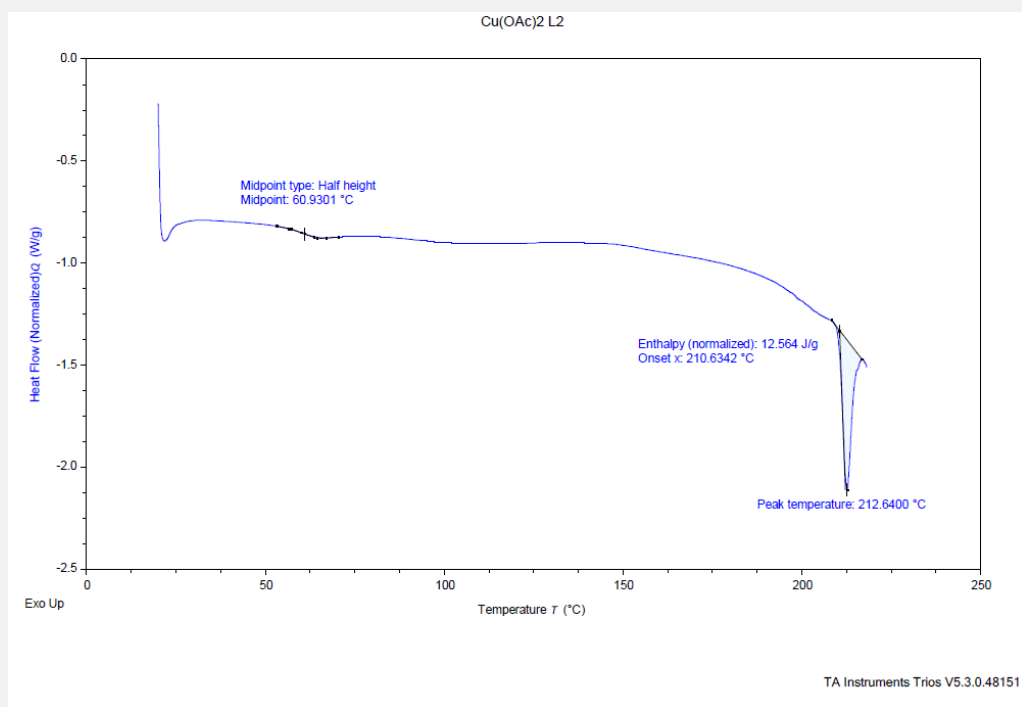

## Thermogravimetric analysis:

Complex **A** vs **B** vs **E**

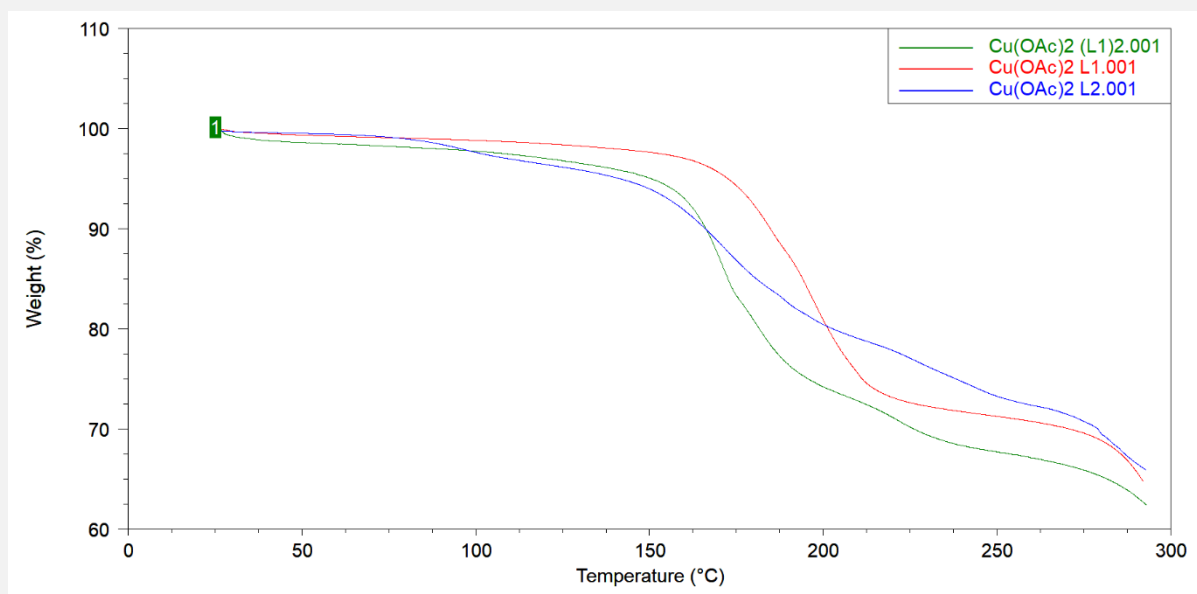

Complex **A** vs **B** vs **C** vs **E**

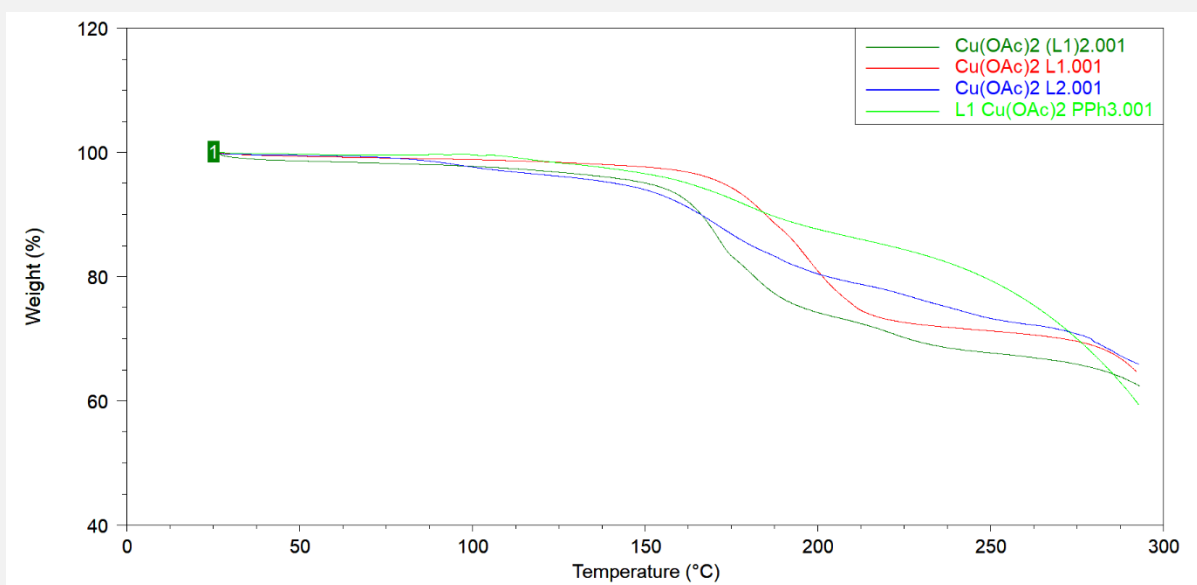

# **Electrochemical Properties of Complexes A-E**

Moiras Complex A –  $[\text{Cu}(\text{OAc})_2\text{L1}]_2$

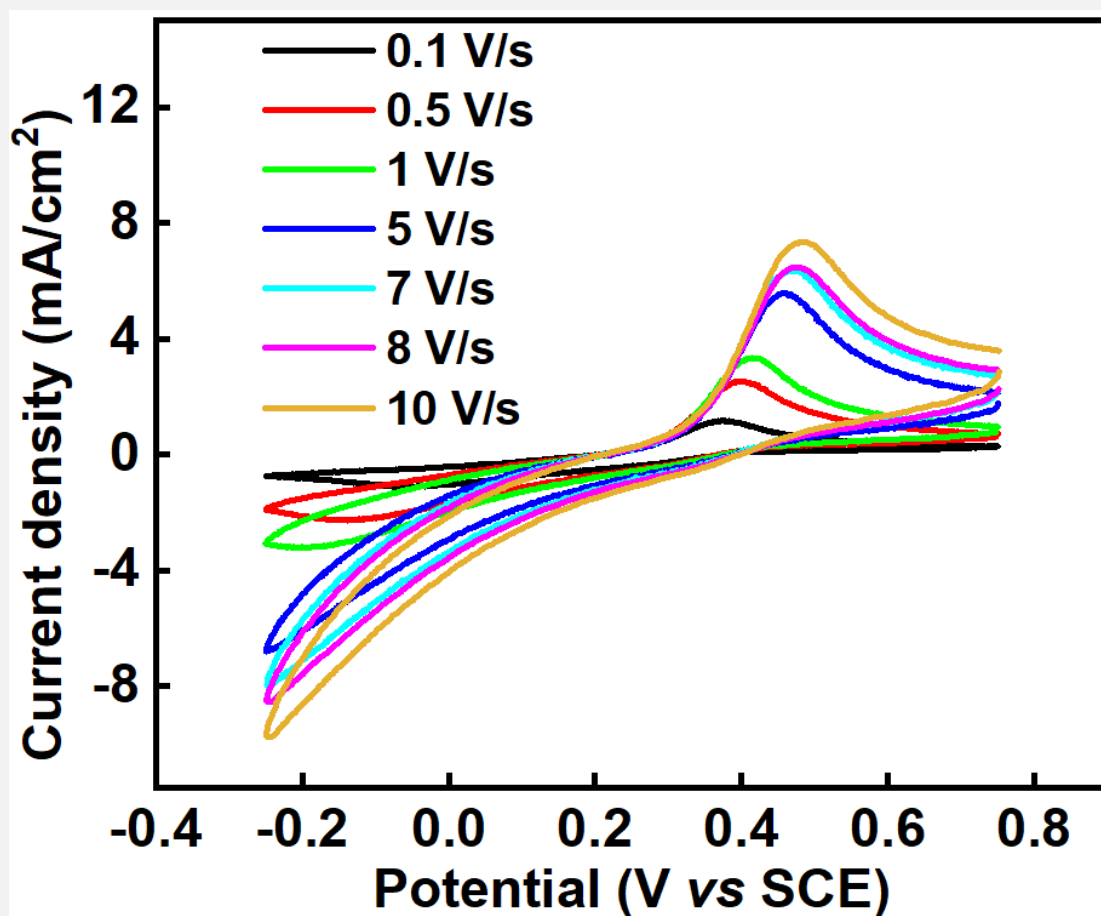

**Figure S5:** Cyclic voltammograms of 0.01 M  $[\text{Cu}(\text{OAc})_2\text{L1}]_2$  in  $\text{CH}_3\text{OH}$  (with 0.1 M  $\text{C}_8\text{H}_2\text{OCIN}$  supporting electrolyte), glassy carbon working electrode, SCE (reference electrode), and platinum foil (counter electrode) at different scan rates (0.1 – 10  $\text{V s}^{-1}$ ).

Complex B –  $\text{Cu}(\text{OAc})_2(\text{L1})_2$

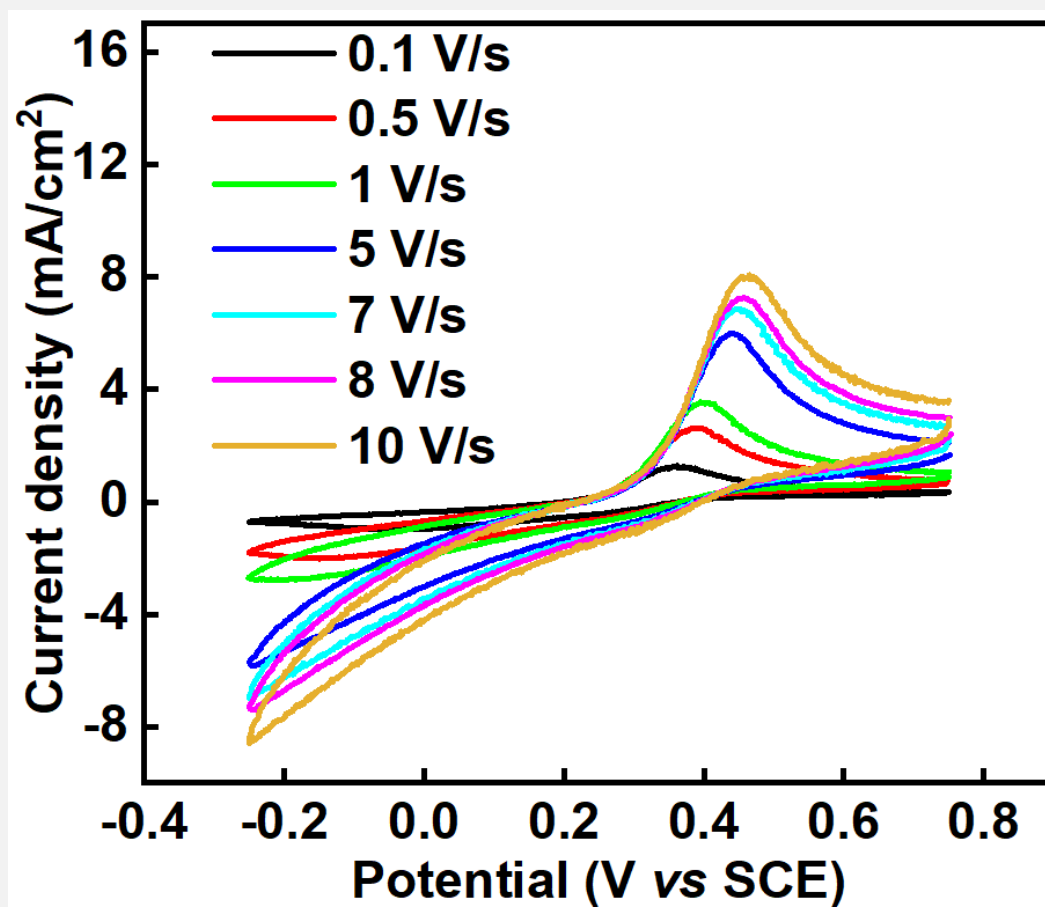

**Figure S6:** Cyclic voltammograms of 0.01 M  $\text{Cu}(\text{OAc})_2(\text{L1})_2$  in  $\text{CH}_3\text{OH}$  (with 0.1 M  $\text{C}_8\text{H}_2\text{OCIN}$  supporting electrolyte), glassy carbon working electrode, SCE (reference electrode), and platinum foil (counter electrode) at different scan rates (0.1 – 10  $\text{V s}^{-1}$ ).

Complex C – Cu(OAc)<sub>2</sub>(L1)PPh<sub>3</sub>

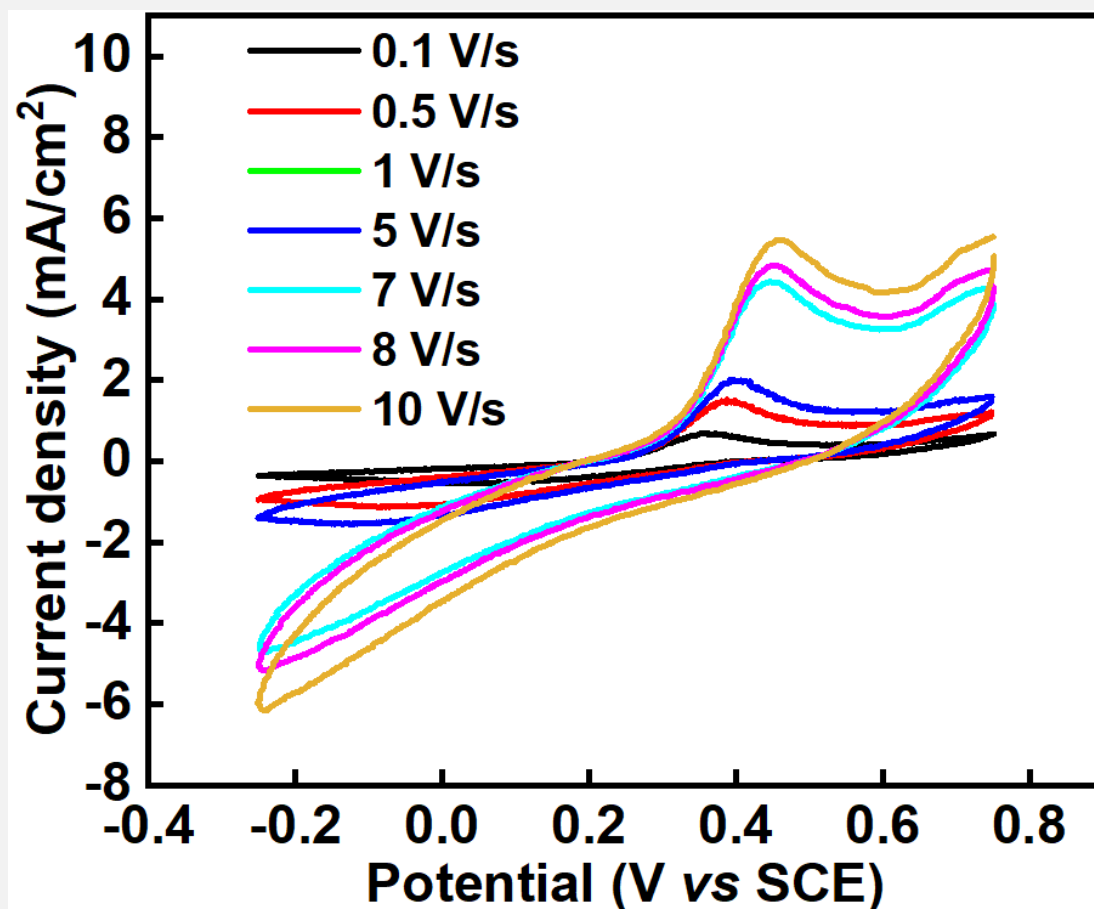

**Figure S7:** Cyclic voltammograms of 0.01 M Cu(OAc)<sub>2</sub>L1PPh<sub>3</sub> in CH<sub>3</sub>OH (with 0.1 M C<sub>8</sub>H<sub>2</sub>OCIN supporting electrolyte), glassy carbon working electrode, SCE (reference electrode), and platinum foil (counter electrode) at different scan rates (0.1 – 10 V s<sup>-1</sup>).

Complex D – CuBr(L1)PPh<sub>3</sub>

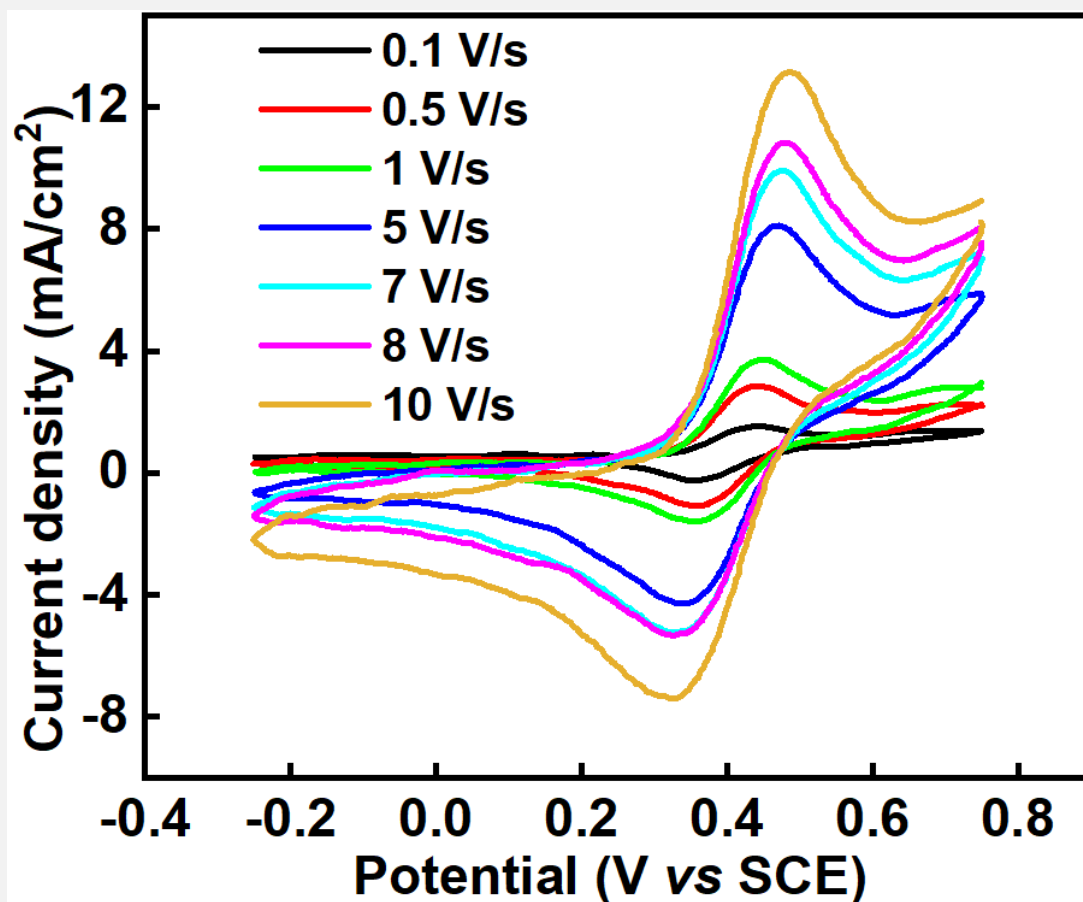

**Figure S8:** Cyclic voltammograms of 0.01 M CuBrL1PPh<sub>3</sub> in CH<sub>3</sub>OH (with 0.1 M C<sub>8</sub>H<sub>2</sub>OCIN supporting electrolyte), glassy carbon working electrode, SCE (reference electrode), and platinum foil (counter electrode) at different scan rates (0.1 – 10 V s<sup>-1</sup>).

Complex E – Cu(OAc)<sub>2</sub>L2

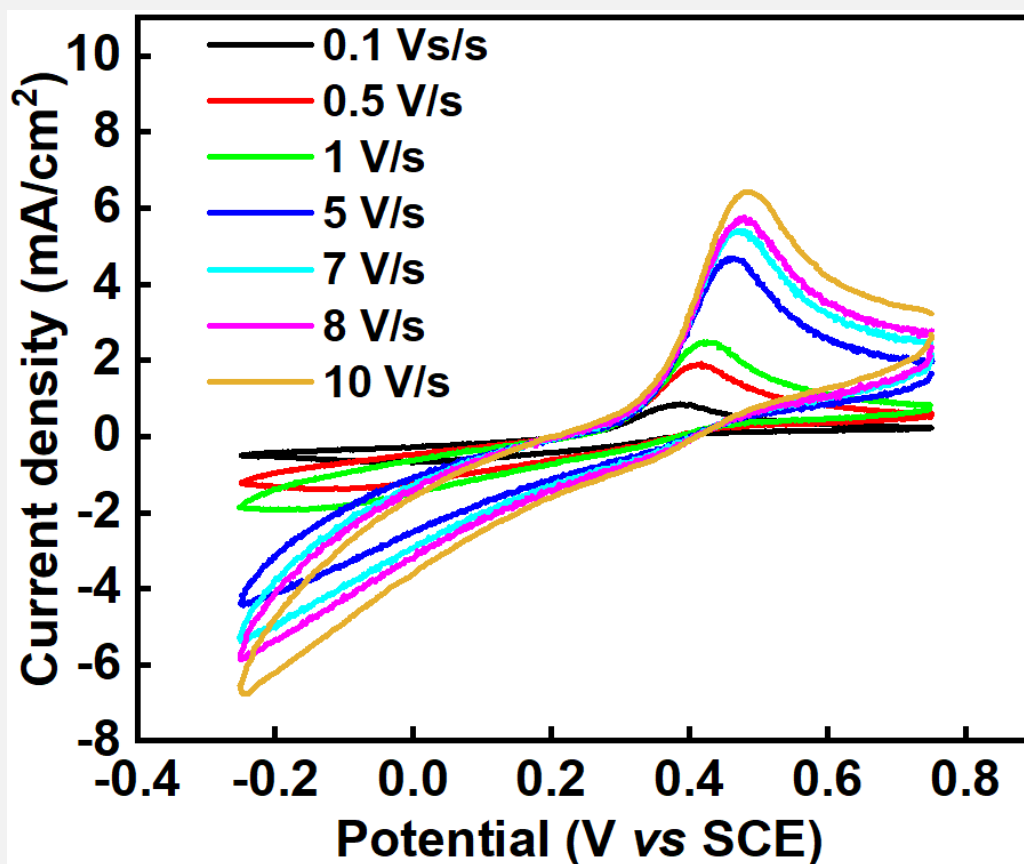

**Figure S9:** Cyclic voltammograms of 0.01 M Cu(OAc)<sub>2</sub>L2 in CH<sub>3</sub>OH (with 0.1 M C<sub>8</sub>H<sub>2</sub>OIN supporting electrolyte), glassy carbon working electrode, SCE (reference electrode), and platinum foil (counter electrode) at different scan rates (0.1 – 10 V s<sup>-1</sup>).



**Application of a Complex A as a catalyst  
in Chan-Lam reaction.**

## Coupling of 4-chloroaniline with arylboronic acids: C-N bond formation

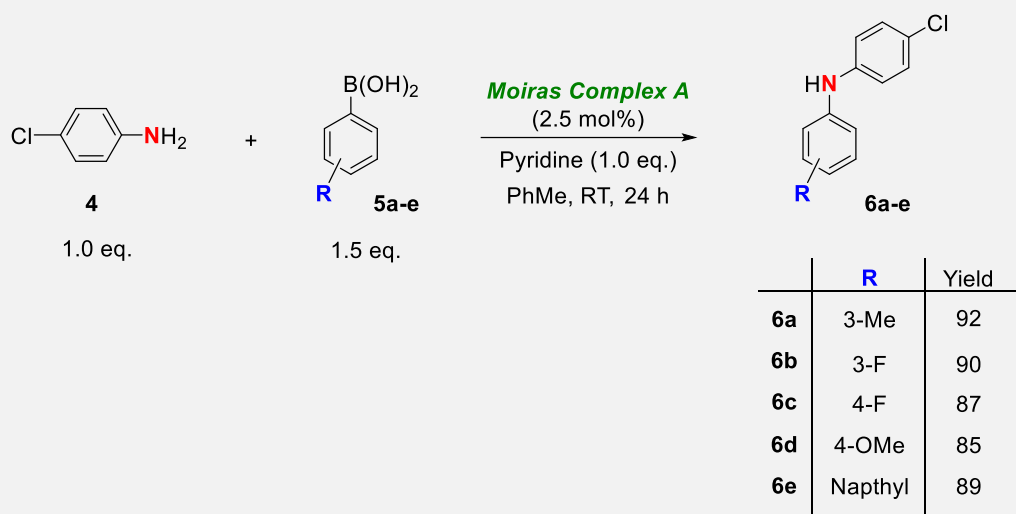

### General experimental procedure for the synthesis of **6a-e**:

Arylamine **4** (0.20 g, 1.5677 mmol, 1.0 eq.), arylboronic acid **5** (2.3516 mmol, 1.5 eq.), and pyridine (0.12 g, 1.5677 mmol, 1.0 eq.) were dissolved in PhMe (5 mL) in a reaction vessel, then **Moiras complex A** (17.1 mg, 0.0392 mmol, 0.025 eq.) was added. The resulting mixture turned blue, and it was left to stir at room temperature for 24 h. Afterwards, it was diluted with ethyl acetate (30 mL), washed with 1 M HCl (15 mL) followed by brine (20 mL). The organic layer was dried with MgSO<sub>4</sub>, filtered and solvent removed *in vacuo*. The crude mixture was purified by silica gel chromatography using 2-5% ethyl acetate in Hexanes.

### ***N*-(4-Chlorophenyl)-3-methylbenzenamine (6a)**

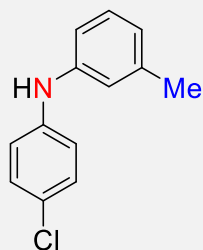

The general experimental procedure described for the synthesis of **6a-6e** was followed using 4-chloroaniline **4** (0.20 g, 1.5677 mmol, 1.0 eq.), 3-tolylboronic acid **5a** (0.32 g, 2.3516 mmol, 1.5 eq.), pyridine (0.12 g, 1.5677 mmol, 1.0 eq.), **Moiras complex A** (17.1 mg, 0.0392 mmol, 0.025 eq.) and PhMe (5 mL). Compound **6a** was obtained as a brown oil (0.31 g, 1.4423 mmol, 92%). **<sup>1</sup>H NMR** (400 MHz, CDCl<sub>3</sub>) δ 7.21 (d, *J* = 8.9 Hz, 2H), 7.14–7.19 (m, 1H), 6.98 (d, *J* = 8.9 Hz, 2H), 6.84–6.89 (m, 2H), 6.78 (d, *J* = 7.7 Hz, 1H), 5.62 (s, 1H, *N*-H), 2.32 (s, 3H). **<sup>13</sup>C NMR** (101 MHz, CDCl<sub>3</sub>) δ 142.7, 142.1, 139.5, 129.4, 129.3, 125.5, 122.5, 118.9, 115.3, 21.6. **IR** (neat)  $\nu_{\max}$  (cm<sup>-1</sup>): 3393, 1585, 1488, 1316. **HRMS** (ESI): calc for C<sub>13</sub>H<sub>12</sub>N<sup>35</sup>Cl *m/z*: 217.0658 found [M+H]<sup>+</sup> 218.0736.

### ***N*-(4-Chlorophenyl)-3-fluorobenzenamine (6b)**

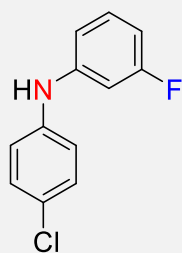

The general experimental procedure described for the synthesis of **6a-6e** was followed using 4-chloroaniline **4** (0.20 g, 1.5677 mmol, 1.0 eq.), 3-fluorophenylboronic acid **5b** (0.33 g, 2.3516 mmol, 1.5 eq.), pyridine (0.12 g, 1.5677 mmol, 1.0 eq.), **Moiras complex A** (17.1 mg, 0.0392 mmol, 0.025 eq.) and PhMe (5 mL). Compound **6b** was obtained as a brown oil (0.31 g, 1.4109 mmol, 90%). **<sup>1</sup>H NMR** (400 MHz, CDCl<sub>3</sub>) δ 7.24 (d, *J* = 8.9 Hz, 2H), 7.16–7.22 (m, 1H), 7.02 (d, *J* = 8.9 Hz, 2H), 6.70–6.77 (m, 2H), 6.57–6.64 (m, 1H), 5.72 (s, 1H, *N*-H). **<sup>13</sup>C NMR** (101 MHz, CDCl<sub>3</sub>) δ 163.9 (d, *J*<sub>C-F</sub> = 244.5 Hz, 1C), 145.0 (d, *J*<sub>C-F</sub> = 10.4 Hz, 1C), 140.8, 130.7 (d, *J*<sub>C-F</sub> = 9.9 Hz, 1C), 129.5, 126.9, 120.2, 112.9 (d, *J*<sub>C-F</sub> = 2.6 Hz, 1C), 107.7 (d, *J*<sub>C-F</sub> = 21.6 Hz, 1C), 104.0 (d, *J*<sub>C-F</sub> = 25.0 Hz, 1C). **<sup>19</sup>F NMR** (377 MHz, CDCl<sub>3</sub>) δ -111.9. **IR** (neat)  $\nu_{\max}$  (cm<sup>-1</sup>): 3410, 1585, 1484, 1323. **HRMS** (ESI): calc for C<sub>12</sub>H<sub>9</sub>NF<sup>35</sup>Cl *m/z*: 221.0408 found [M+H]<sup>+</sup> 222.0486.

### ***N*-(4-Chlorophenyl)-4-fluorobenzenamine (6c)**

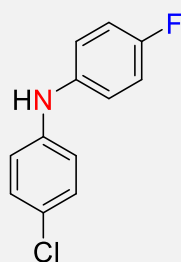

The general experimental procedure described for the synthesis of **6a-6e** was followed using 4-chloroaniline **4** (0.20 g, 1.5677 mmol, 1.0 eq.), 4-fluorophenylboronic acid **5c** (0.33 g, 2.3516 mmol, 1.5 eq.), pyridine (0.12 g, 1.5677 mmol, 1.0 eq.), **Moiras complex A** (17.1 mg, 0.0392 mmol, 0.025 eq.) and PhMe (5 mL). Compound **6c** was obtained as a brown oil (0.30 g, 1.3639 mmol, 87%). **<sup>1</sup>H NMR** (400 MHz, CDCl<sub>3</sub>) δ 7.19 (d, *J* = 8.8 Hz, 2H), 6.96–7.06 (m, 4H), 6.89 (d, *J* = 8.8 Hz, 2H), 5.54 (s, 1H, *N*-H). **<sup>13</sup>C NMR** (101 MHz, CDCl<sub>3</sub>) δ 158.4 (d, *J*<sub>C-F</sub> = 241.0 Hz, 1C), 142.8, 138.6 (d, *J*<sub>C-F</sub> = 2.6 Hz, 1C), 129.4, 125.2, 121.1 (d, *J*<sub>C-F</sub> = 7.9 Hz, 1C), 117.9, 116.2 (d, *J*<sub>C-F</sub> = 22.6 Hz, 1C). **<sup>19</sup>F NMR** (377 MHz, CDCl<sub>3</sub>) δ -121.1. **IR** (neat) *V*<sub>max</sub> (cm<sup>-1</sup>): 3409, 1593, 1489, 1312. **HRMS** (ESI): calc for C<sub>12</sub>H<sub>9</sub>NF<sup>35</sup>Cl *m/z*: 221.0408 found [M+H]<sup>+</sup> 222.0486.

### **4-Chloro-*N*-(4-methoxyphenyl)benzenamine (6d)**

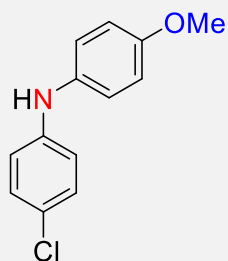

The general experimental procedure described for the synthesis of **6a-6e** was followed using 4-chloroaniline **4** (0.20 g, 1.5677 mmol, 1.0 eq.), 4-methoxyphenylboronic acid **5d** (0.36 g, 2.3516 mmol, 1.5 eq.), pyridine (0.12 g, 1.5677 mmol, 1.0 eq.), **Moiras complex A** (17.1 mg, 0.0392 mmol, 0.025 eq.) and PhMe (5 mL). Compound **6d** was obtained as a brown solid (0.31 g, 1.3325 mmol, 85%). **<sup>1</sup>H NMR** (400 MHz, CDCl<sub>3</sub>) δ 7.14 (d, *J* = 8.9 Hz, 2H), 7.05 (d, *J* = 8.9 Hz, 2H), 6.87 (d, *J* = 8.9 Hz, 2H), 6.82 (d, *J* = 8.9 Hz, 2H), 5.46 (s, 1H, *N*-H), 3.80 (s, 3H). **<sup>13</sup>C NMR** (101 MHz, CDCl<sub>3</sub>) δ 129.2, 122.7, 119.6, 116.7, 114.9, 55.7. **IR** (neat) *V*<sub>max</sub> (cm<sup>-1</sup>): 3415, 1595, 1491, 1292. **HRMS** (ESI): calc for C<sub>13</sub>H<sub>12</sub>NO<sup>35</sup>Cl *m/z*: 233.0607 found [M+H]<sup>+</sup> 234.0685. **MP**: 50–52 °C

### ***N*-(4-Chlorophenyl)-1-naphthalenamine (6e)**

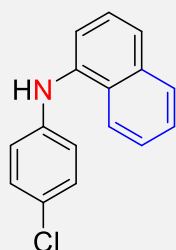

The general experimental procedure described for the synthesis of **6a-6e** was followed using 4-chloroaniline **4** (0.20 g, 1.5677 mmol, 1.0 eq.), 4-methoxyphenylboronic acid **5e** (0.36 g, 2.3516 mmol, 1.5 eq.), pyridine (0.12 g, 1.5677 mmol, 1.0 eq.), **Moiras complex A** (17.1 mg, 0.0392 mmol, 0.025 eq.) and PhMe (5 mL). Compound **6e** was obtained as a brown solid (0.35 g, 1.3953 mmol, 89%). **<sup>1</sup>H NMR** (400 MHz, CDCl<sub>3</sub>) δ 7.72–7.78 (m, 2H), 7.62–7.68 (m, 1H), 7.37–7.46 (m, 2H), 7.30–7.34 (m, 1H), 7.23–7.27 (m, 2H), 7.18–7.20 (m, 1H), 7.05–7.09 (m, 2H), 5.82 (s, 1H, *N*-H). **<sup>13</sup>C NMR** (101 MHz, CDCl<sub>3</sub>) δ 141.6, 140.3, 134.6, 129.6, 129.54, 129.52, 127.8, 126.74, 126.72, 126.3, 124.0, 120.1, 119.5, 112.5. **IR** (neat)  $\nu_{\max}$  (cm<sup>-1</sup>): 3396, 1591, 1487, 1311. **HRMS** (ESI): calc for C<sub>16</sub>H<sub>12</sub>N<sup>35</sup>Cl *m/z*: 253.0658 found [M+H]<sup>+</sup> 254.0736. **MP**: 90–92 °C

### **References**

1. (a) S. Racioppi, L. Orian, C. Tubaro, A. Gennaro, and A. Ahmed Isse, Solvent Coordination Effect on Copper-Based Molecular Catalysts for Controlled Radical Polymerization, *Catalysts* 2022, **12**, 1656. (b) H. Zhang and R. M. Gschwind, Influence of Copper Salts, Solvents, and Ligands on the Structures of Precatalytic Phosphoramidite Copper Complexes for Conjugate Addition Reactions, *Chem. Eur. J.* 2007, **13**, 6691–6700. (c) H.-C Liang, M. J. Henson, L. Q. Hatcher, M. A. Vance, C. X. Zhang, D. Lahti, S. Kaderli, R. D. Sommer, A. L. Rheingold, A. D. ZuberbUhler, E. I. Solomon, and K. D. Karlin, *Inorg. Chem.* 2004, **43**, 4115–4117.

# **X-ray Crystallography**

## Structure report for Moiras Complex A (2023GU0007 /Expt 50 +Cu(OAc)2)

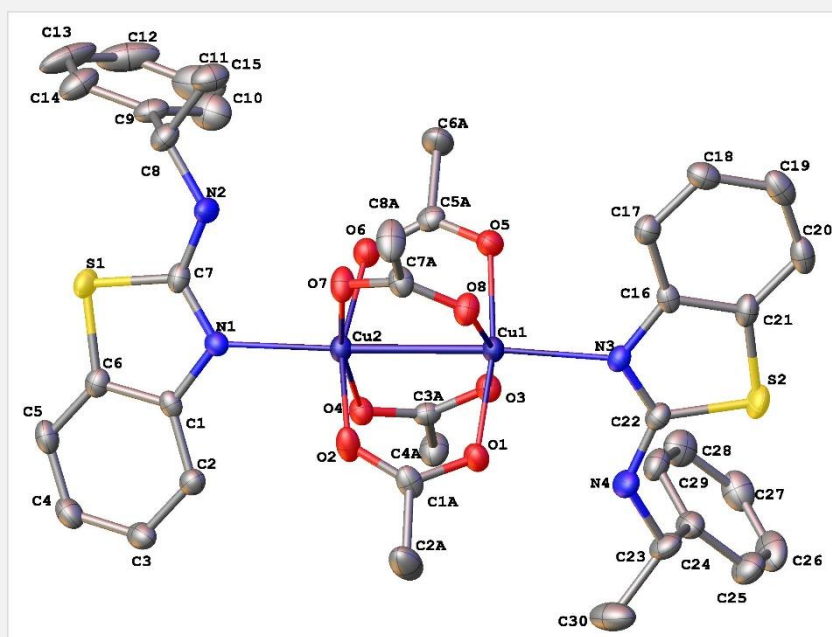

View showing the structure and atom labelling scheme. Atomic displacement ellipsoids drawn at 50% probability level, H- atoms omitted for clarity.

### Refinement

Crystal data, data collection and structure refinement details are summarized in Table 1.

### Results and discussion

#### Computing details

Data collection: *APEX3* Ver. 2016.9-0 (Bruker-AXS, 2016); cell refinement: *SAINT* V8.40B (? , 2016); data reduction: *SAINT* V8.40B (? , 2016); program(s) used to solve structure: *SHELXT* 2018/2 (Sheldrick, 2018); program(s) used to refine structure: *SHELXL* 2018/3 (Sheldrick, 2015); molecular graphics: *Olex2* 1.5 (Dolomanov *et al.*, 2009); software used to prepare material for publication: *Olex2* 1.5 (Dolomanov *et al.*, 2009).

### References

- Dolomanov, O. V., Bourhis, L. J., Gildea, R. J., Howard, J. A. K. & Puschmann, H. (2009). *J. Appl. Cryst.* **42**, 339–341.
- Sheldrick, G. M. (2015). *Acta Cryst.* **A71**, 3–8.
- Sheldrick, G. M. (2015). *Acta Cryst.* **C71**, 3–8.

(mo\_2023gu0007\_150k\_0m)

## Crystal data

|                                |                                                         |
|--------------------------------|---------------------------------------------------------|
| $C_{38}H_{40}Cu_2N_4O_8S_2$    | $D_x = 1.467 \text{ Mg m}^{-3}$                         |
| $M_r = 871.94$                 | Mo $K\alpha$ radiation, $\lambda = 0.71073 \text{ \AA}$ |
| Orthorhombic, $P2_12_12_1$     | Cell parameters from 9883 reflections                   |
| $a = 10.1971 (4) \text{ \AA}$  | $\theta = 2.5\text{--}27.5^\circ$                       |
| $b = 14.3001 (5) \text{ \AA}$  | $\mu = 1.24 \text{ mm}^{-1}$                            |
| $c = 27.0785 (11) \text{ \AA}$ | $T = 150 \text{ K}$                                     |
| $V = 3948.6 (3) \text{ \AA}^3$ | Block, green                                            |
| $Z = 4$                        | $0.25 \times 0.14 \times 0.05 \text{ mm}$               |
| $F(000) = 1800$                |                                                         |

## Data collection

|                                                                                                                                                                                                                                                                               |                                                                        |
|-------------------------------------------------------------------------------------------------------------------------------------------------------------------------------------------------------------------------------------------------------------------------------|------------------------------------------------------------------------|
| Bruker D8 VENTURE diffractometer                                                                                                                                                                                                                                              | 9774 independent reflections                                           |
| Radiation source: microfocus sealed tube, INCOATEC I $\mu$ s 3.0                                                                                                                                                                                                              | 8253 reflections with $I > 2\sigma(I)$                                 |
| Multilayer mirror optics monochromator                                                                                                                                                                                                                                        | $R_{\text{int}} = 0.055$                                               |
| Detector resolution: $7.4074 \text{ pixels mm}^{-1}$                                                                                                                                                                                                                          | $\theta_{\text{max}} = 28.3^\circ$ , $\theta_{\text{min}} = 2.1^\circ$ |
| $\phi$ and $\omega$ scans                                                                                                                                                                                                                                                     | $h = -13 \rightarrow 9$                                                |
| Absorption correction: multi-scan SADABS2016/2 (Bruker,2016/2) was used for absorption correction. $wR2(\text{int})$ was 0.1188 before and 0.0705 after correction. The Ratio of minimum to maximum transmission is 0.8168. The $\lambda/2$ correction factor is Not present. | $k = -17 \rightarrow 19$                                               |
| $T_{\text{min}} = 0.609$ , $T_{\text{max}} = 0.746$                                                                                                                                                                                                                           | $l = -36 \rightarrow 29$                                               |
| 31215 measured reflections                                                                                                                                                                                                                                                    |                                                                        |

## Refinement

|                                  |                                                                           |
|----------------------------------|---------------------------------------------------------------------------|
| Refinement on $F^2$              | Hydrogen site location: inferred from neighbouring sites                  |
| Least-squares matrix: full       | H-atom parameters constrained                                             |
| $R[F^2 > 2\sigma(F^2)] = 0.041$  | $w = 1/[\sigma^2(F_o^2) + (0.0378P)^2]$<br>where $P = (F_o^2 + 2F_c^2)/3$ |
| $wR(F^2) = 0.090$                | $(\Delta/\sigma)_{\text{max}} = 0.001$                                    |
| $S = 1.01$                       | $\Delta_{\text{max}} = 0.59 \text{ e \AA}^{-3}$                           |
| 9774 reflections                 | $\Delta_{\text{min}} = -0.28 \text{ e \AA}^{-3}$                          |
| 494 parameters                   | Absolute structure: Refined as an inversion twin.                         |
| 0 restraints                     | Absolute structure parameter: 0.019 (13)                                  |
| Primary atom site location: dual |                                                                           |



## Special details

*Geometry.* All esds (except the esd in the dihedral angle between two l.s. planes) are estimated using the full covariance matrix. The cell esds are taken into account individually in the estimation of esds in distances, angles and torsion angles; correlations between esds in cell parameters are only used when they are defined by crystal symmetry. An approximate (isotropic) treatment of cell esds is used for estimating esds involving l.s. planes.

*Refinement.* Refined as a 2-component inversion twin.

## Fractional atomic coordinates and isotropic or equivalent isotropic displacement parameters ( $\text{\AA}^2$ ) for (mo\_2023gu0007\_150k\_0m)

|      | x            | y            | z            | $U_{\text{iso}}^*/U_{\text{eq}}$ |
|------|--------------|--------------|--------------|----------------------------------|
| Cu1  | 0.25470 (5)  | 0.34441 (3)  | 0.39415 (2)  | 0.01857 (11)                     |
| S1   | 0.46804 (11) | 0.82573 (7)  | 0.42404 (4)  | 0.0254 (2)                       |
| O1   | 0.1043 (3)   | 0.35952 (19) | 0.43933 (10) | 0.0251 (7)                       |
| N1   | 0.3465 (3)   | 0.6663 (2)   | 0.43371 (11) | 0.0197 (7)                       |
| C1   | 0.2540 (5)   | 0.7364 (2)   | 0.44131 (13) | 0.0185 (8)                       |
| C1A  | 0.0979 (5)   | 0.4274 (3)   | 0.46952 (15) | 0.0243 (10)                      |
| Cu2  | 0.30203 (5)  | 0.52111 (3)  | 0.41716 (2)  | 0.01903 (12)                     |
| S2   | 0.06214 (13) | 0.07240 (8)  | 0.32956 (4)  | 0.0319 (3)                       |
| O2   | 0.1769 (3)   | 0.49394 (18) | 0.47170 (10) | 0.0280 (7)                       |
| N2   | 0.5715 (3)   | 0.6531 (2)   | 0.41884 (13) | 0.0244 (7)                       |
| H2   | 0.565063     | 0.593182     | 0.419735     | 0.029*                           |
| C2   | 0.1218 (4)   | 0.7220 (3)   | 0.45217 (15) | 0.0234 (9)                       |
| H2A  | 0.089104     | 0.661670     | 0.455852     | 0.028*                           |
| C2A  | -0.0162 (6)  | 0.4264 (3)   | 0.50451 (19) | 0.0425 (14)                      |
| H2AA | -0.093141    | 0.448838     | 0.487855     | 0.064*                           |
| H2AB | 0.002548     | 0.465934     | 0.532259     | 0.064*                           |
| H2AC | -0.031147    | 0.363613     | 0.515801     | 0.064*                           |
| O3   | 0.1442 (3)   | 0.40517 (18) | 0.34206 (9)  | 0.0220 (6)                       |
| N3   | 0.1987 (4)   | 0.2023 (2)   | 0.37296 (11) | 0.0198 (7)                       |
| C3   | 0.0400 (5)   | 0.7985 (3)   | 0.45740 (15) | 0.0278 (10)                      |
| H3   | -0.048151    | 0.789433     | 0.464753     | 0.033*                           |
| C3A  | 0.1108 (4)   | 0.4904 (3)   | 0.34386 (14) | 0.0208 (9)                       |
| O4   | 0.1526 (3)   | 0.54899 (18) | 0.37427 (10) | 0.0221 (6)                       |
| N4   | -0.0265 (4)  | 0.2324 (2)   | 0.36971 (13) | 0.0272 (8)                       |
| H4   | -0.015293    | 0.281074     | 0.387880     | 0.033*                           |
| C4   | 0.0885 (5)   | 0.8895 (3)   | 0.45174 (16) | 0.0299 (11)                      |
| H4A  | 0.031716     | 0.940087     | 0.454784     | 0.036*                           |
| C4A  | 0.0149 (5)   | 0.5236 (3)   | 0.30523 (16) | 0.0314 (10)                      |
| H4AA | 0.057864     | 0.526308     | 0.273716     | 0.047*                           |

|      |            |              |              |             |
|------|------------|--------------|--------------|-------------|
| H4AB | -0.016514  | 0.584727     | 0.313908     | 0.047*      |
| H4AC | -0.057615  | 0.480947     | 0.303494     | 0.047*      |
| O5   | 0.4063 (3) | 0.35455 (19) | 0.35019 (10) | 0.0245 (7)  |
| C5   | 0.2182 (5) | 0.9050 (3)   | 0.44180 (15) | 0.0280 (11) |
| H5   | 0.250387   | 0.965496     | 0.438442     | 0.034*      |
| C5A  | 0.4506 (4) | 0.4335 (3)   | 0.33870 (15) | 0.0227 (9)  |
| O6   | 0.4180 (3) | 0.51001 (19) | 0.35796 (10) | 0.0262 (7)  |
| C6   | 0.3010 (5) | 0.8284 (3)   | 0.43682 (14) | 0.0222 (9)  |
| C6A  | 0.5514 (5) | 0.4365 (3)   | 0.29776 (17) | 0.0352 (12) |
| H6AA | 0.521004   | 0.476823     | 0.271827     | 0.053*      |
| H6AB | 0.564442   | 0.374631     | 0.284927     | 0.053*      |
| H6AC | 0.632838   | 0.459990     | 0.310544     | 0.053*      |
| O7   | 0.4472 (3) | 0.46832 (19) | 0.45588 (10) | 0.0273 (7)  |
| C7   | 0.4626 (4) | 0.7026 (3)   | 0.42552 (14) | 0.0207 (9)  |
| C7A  | 0.4509 (5) | 0.3827 (3)   | 0.46700 (15) | 0.0247 (10) |
| O8   | 0.3766 (3) | 0.32018 (19) | 0.45016 (10) | 0.0257 (7)  |
| C8   | 0.7009 (5) | 0.6931 (3)   | 0.41010 (15) | 0.0262 (9)  |
| H8   | 0.719104   | 0.738216     | 0.436456     | 0.031*      |
| C8A  | 0.5554 (6) | 0.3534 (3)   | 0.50347 (17) | 0.0382 (12) |
| H8AA | 0.629592   | 0.394449     | 0.500599     | 0.057*      |
| H8AB | 0.582238   | 0.290432     | 0.496566     | 0.057*      |
| H8AC | 0.520867   | 0.356871     | 0.536397     | 0.057*      |
| C9   | 0.7094 (5) | 0.7439 (3)   | 0.36102 (15) | 0.0288 (10) |
| C10  | 0.6618 (6) | 0.7028 (4)   | 0.31854 (17) | 0.0442 (14) |
| H10  | 0.620691   | 0.644849     | 0.320136     | 0.053*      |
| C11  | 0.6752 (6) | 0.7481 (5)   | 0.27322 (19) | 0.0582 (18) |
| H11  | 0.644336   | 0.719721     | 0.244584     | 0.070*      |
| C12  | 0.7337 (6) | 0.8341 (5)   | 0.2707 (2)   | 0.0620 (19) |
| H12  | 0.743555   | 0.863767     | 0.240370     | 0.074*      |
| C13  | 0.7774 (5) | 0.8763 (5)   | 0.3128 (2)   | 0.0588 (18) |
| H13  | 0.814616   | 0.935604     | 0.311032     | 0.071*      |
| C14  | 0.7670 (5) | 0.8318 (3)   | 0.35822 (19) | 0.0406 (12) |
| H14  | 0.798442   | 0.860636     | 0.386618     | 0.049*      |
| C15  | 0.8010 (5) | 0.6145 (3)   | 0.41381 (18) | 0.0361 (11) |
| H15A | 0.802840   | 0.591021     | 0.447015     | 0.054*      |
| H15B | 0.886152   | 0.637887     | 0.405125     | 0.054*      |
| H15C | 0.777086   | 0.564978     | 0.391622     | 0.054*      |
| C16  | 0.2860 (5) | 0.1319 (2)   | 0.36048 (13) | 0.0200 (9)  |
| C17  | 0.4196 (5) | 0.1302 (3)   | 0.37107 (15) | 0.0252 (10) |
| H17  | 0.458714   | 0.179823     | 0.387662     | 0.030*      |

|      |             |             |              |             |
|------|-------------|-------------|--------------|-------------|
| C18  | 0.4931 (5)  | 0.0543 (3)  | 0.35673 (16) | 0.0300 (11) |
| H18  | 0.582070    | 0.052658    | 0.364157     | 0.036*      |
| C19  | 0.4370 (5)  | -0.0195 (3) | 0.33146 (16) | 0.0335 (11) |
| H19  | 0.489066    | -0.069719   | 0.321830     | 0.040*      |
| C20  | 0.3054 (5)  | -0.0200 (3) | 0.32032 (15) | 0.0318 (11) |
| H20  | 0.267946    | -0.069433   | 0.303005     | 0.038*      |
| C21  | 0.2304 (5)  | 0.0551 (3)  | 0.33561 (14) | 0.0264 (10) |
| C22  | 0.0792 (5)  | 0.1798 (3)  | 0.36015 (14) | 0.0219 (9)  |
| C23  | -0.1582 (5) | 0.2142 (3)  | 0.35203 (16) | 0.0307 (10) |
| H23  | -0.181295   | 0.150041    | 0.361240     | 0.037*      |
| C24  | -0.1714 (5) | 0.2227 (3)  | 0.29628 (16) | 0.0271 (10) |
| C25  | -0.2775 (5) | 0.1801 (4)  | 0.27276 (18) | 0.0380 (12) |
| H25  | -0.338149   | 0.146451    | 0.291238     | 0.046*      |
| C26  | -0.2930 (6) | 0.1875 (4)  | 0.22232 (19) | 0.0440 (13) |
| H26  | -0.364363   | 0.159189    | 0.207026     | 0.053*      |
| C27  | -0.2037 (6) | 0.2366 (3)  | 0.19455 (18) | 0.0385 (12) |
| H27  | -0.213706   | 0.240807    | 0.160488     | 0.046*      |
| C28  | -0.0992 (5) | 0.2794 (3)  | 0.21745 (18) | 0.0369 (12) |
| H28  | -0.039258   | 0.313268    | 0.198733     | 0.044*      |
| C29  | -0.0824 (5) | 0.2726 (3)  | 0.26771 (16) | 0.0292 (10) |
| H29  | -0.010997   | 0.301516    | 0.282672     | 0.035*      |
| C30  | -0.2507 (6) | 0.2800 (4)  | 0.37935 (19) | 0.0507 (14) |
| H30A | -0.240556   | 0.271492    | 0.414310     | 0.076*      |
| H30B | -0.339628   | 0.266453    | 0.370121     | 0.076*      |
| H30C | -0.230336   | 0.343540    | 0.370846     | 0.076*      |

*Atomic displacement parameters ( $\text{\AA}^2$ ) for (mo\_2023gu0007\_150k\_0m)*

|     | $U^{11}$    | $U^{22}$    | $U^{33}$    | $U^{12}$     | $U^{13}$     | $U^{23}$      |
|-----|-------------|-------------|-------------|--------------|--------------|---------------|
| Cu1 | 0.0212 (3)  | 0.0171 (2)  | 0.0174 (2)  | -0.0010 (2)  | -0.0008 (2)  | -0.00138 (17) |
| S1  | 0.0253 (6)  | 0.0171 (5)  | 0.0340 (6)  | -0.0040 (4)  | -0.0017 (5)  | 0.0027 (4)    |
| O1  | 0.0293 (18) | 0.0234 (15) | 0.0225 (15) | -0.0008 (14) | 0.0034 (13)  | -0.0042 (12)  |
| N1  | 0.0186 (18) | 0.0205 (17) | 0.0199 (17) | 0.0014 (15)  | -0.0023 (13) | -0.0026 (13)  |
| C1  | 0.025 (2)   | 0.0176 (17) | 0.0128 (17) | 0.0025 (19)  | -0.0010 (17) | -0.0012 (13)  |
| C1A | 0.037 (3)   | 0.020 (2)   | 0.015 (2)   | 0.004 (2)    | 0.0010 (18)  | 0.0032 (15)   |
| Cu2 | 0.0230 (3)  | 0.0160 (2)  | 0.0181 (2)  | -0.0009 (2)  | -0.0026 (2)  | -0.00011 (18) |
| S2  | 0.0324 (7)  | 0.0271 (5)  | 0.0362 (7)  | -0.0079 (5)  | -0.0068 (5)  | -0.0092 (5)   |
| O2  | 0.045 (2)   | 0.0193 (14) | 0.0194 (14) | -0.0036 (14) | 0.0046 (13)  | -0.0013 (11)  |
| N2  | 0.022 (2)   | 0.0177 (15) | 0.0336 (19) | -0.0009 (15) | 0.0032 (16)  | 0.0013 (15)   |

|     |             |             |             |              |              |              |
|-----|-------------|-------------|-------------|--------------|--------------|--------------|
| C2  | 0.024 (2)   | 0.025 (2)   | 0.022 (2)   | -0.0022 (19) | 0.0012 (18)  | -0.0023 (16) |
| C2A | 0.052 (4)   | 0.033 (2)   | 0.042 (3)   | 0.000 (3)    | 0.022 (3)    | -0.001 (2)   |
| O3  | 0.0255 (17) | 0.0211 (14) | 0.0195 (15) | 0.0009 (13)  | -0.0023 (12) | -0.0004 (11) |
| N3  | 0.0207 (18) | 0.0205 (16) | 0.0181 (16) | -0.0038 (16) | -0.0030 (15) | -0.0004 (12) |
| C3  | 0.023 (2)   | 0.034 (2)   | 0.027 (2)   | 0.002 (2)    | -0.0018 (19) | -0.0071 (18) |
| C3A | 0.018 (2)   | 0.025 (2)   | 0.020 (2)   | 0.0003 (18)  | 0.0009 (17)  | 0.0027 (16)  |
| O4  | 0.0250 (17) | 0.0200 (14) | 0.0212 (14) | 0.0011 (13)  | -0.0028 (12) | -0.0016 (11) |
| N4  | 0.022 (2)   | 0.0312 (19) | 0.0282 (19) | -0.0031 (17) | -0.0039 (16) | -0.0083 (15) |
| C4  | 0.032 (3)   | 0.027 (2)   | 0.031 (2)   | 0.008 (2)    | -0.003 (2)   | -0.0061 (18) |
| C4A | 0.032 (3)   | 0.029 (2)   | 0.033 (2)   | 0.000 (2)    | -0.010 (2)   | -0.0004 (19) |
| O5  | 0.0249 (18) | 0.0234 (14) | 0.0253 (15) | 0.0006 (14)  | 0.0028 (13)  | -0.0008 (12) |
| C5  | 0.037 (3)   | 0.0184 (19) | 0.028 (2)   | 0.003 (2)    | -0.004 (2)   | -0.0037 (15) |
| C5A | 0.019 (2)   | 0.030 (2)   | 0.020 (2)   | -0.0026 (19) | -0.0040 (17) | -0.0002 (17) |
| O6  | 0.0291 (19) | 0.0240 (15) | 0.0255 (16) | -0.0022 (14) | 0.0016 (13)  | -0.0020 (12) |
| C6  | 0.026 (2)   | 0.022 (2)   | 0.0180 (18) | -0.0031 (19) | -0.0023 (17) | 0.0005 (15)  |
| C6A | 0.036 (3)   | 0.036 (2)   | 0.033 (3)   | -0.004 (2)   | 0.015 (2)    | -0.0060 (19) |
| O7  | 0.0359 (19) | 0.0183 (14) | 0.0278 (16) | -0.0002 (14) | -0.0117 (14) | 0.0009 (12)  |
| C7  | 0.026 (2)   | 0.0173 (18) | 0.019 (2)   | -0.0029 (18) | -0.0056 (17) | 0.0016 (15)  |
| C7A | 0.030 (3)   | 0.023 (2)   | 0.021 (2)   | 0.002 (2)    | -0.0050 (19) | -0.0017 (16) |
| O8  | 0.0312 (19) | 0.0213 (15) | 0.0247 (15) | -0.0021 (14) | -0.0071 (13) | 0.0022 (11)  |
| C8  | 0.023 (2)   | 0.030 (2)   | 0.026 (2)   | -0.006 (2)   | -0.0025 (19) | 0.0001 (17)  |
| C8A | 0.047 (3)   | 0.027 (2)   | 0.041 (3)   | 0.004 (2)    | -0.023 (2)   | 0.002 (2)    |
| C9  | 0.017 (2)   | 0.041 (2)   | 0.028 (2)   | -0.001 (2)   | 0.0002 (19)  | 0.0040 (18)  |
| C10 | 0.042 (3)   | 0.059 (3)   | 0.032 (3)   | 0.005 (3)    | -0.008 (2)   | -0.002 (2)   |
| C11 | 0.047 (4)   | 0.102 (5)   | 0.025 (3)   | 0.013 (4)    | -0.007 (3)   | -0.001 (3)   |
| C12 | 0.028 (3)   | 0.112 (5)   | 0.046 (3)   | 0.008 (4)    | 0.006 (3)    | 0.040 (3)    |
| C13 | 0.023 (3)   | 0.081 (4)   | 0.072 (4)   | -0.010 (3)   | 0.002 (3)    | 0.047 (3)    |
| C14 | 0.027 (3)   | 0.049 (3)   | 0.047 (3)   | -0.010 (3)   | -0.005 (2)   | 0.013 (2)    |
| C15 | 0.024 (2)   | 0.043 (3)   | 0.041 (3)   | 0.000 (2)    | 0.000 (2)    | 0.009 (2)    |
| C16 | 0.030 (3)   | 0.0165 (17) | 0.0136 (18) | 0.0004 (17)  | 0.0003 (17)  | 0.0012 (13)  |
| C17 | 0.028 (3)   | 0.023 (2)   | 0.024 (2)   | -0.0026 (19) | -0.0015 (19) | 0.0010 (16)  |
| C18 | 0.028 (3)   | 0.033 (2)   | 0.029 (2)   | 0.007 (2)    | 0.003 (2)    | 0.0023 (19)  |
| C19 | 0.049 (3)   | 0.026 (2)   | 0.026 (2)   | 0.009 (2)    | 0.007 (2)    | 0.0015 (19)  |
| C20 | 0.049 (3)   | 0.021 (2)   | 0.025 (2)   | -0.001 (2)   | 0.001 (2)    | -0.0035 (17) |
| C21 | 0.034 (3)   | 0.0220 (19) | 0.023 (2)   | -0.0058 (19) | -0.0028 (19) | -0.0019 (16) |
| C22 | 0.022 (2)   | 0.024 (2)   | 0.020 (2)   | -0.0038 (18) | -0.0038 (17) | -0.0007 (16) |
| C23 | 0.019 (2)   | 0.040 (2)   | 0.033 (2)   | -0.006 (2)   | -0.0031 (19) | -0.002 (2)   |
| C24 | 0.022 (3)   | 0.031 (2)   | 0.027 (2)   | 0.001 (2)    | -0.0044 (18) | -0.0052 (17) |
| C25 | 0.028 (3)   | 0.045 (3)   | 0.041 (3)   | -0.007 (2)   | -0.006 (2)   | -0.005 (2)   |
| C26 | 0.041 (3)   | 0.044 (3)   | 0.047 (3)   | 0.004 (3)    | -0.023 (3)   | -0.015 (2)   |

|     |           |           |           |            |            |              |
|-----|-----------|-----------|-----------|------------|------------|--------------|
| C27 | 0.050 (3) | 0.036 (3) | 0.029 (2) | 0.009 (3)  | -0.012 (2) | -0.002 (2)   |
| C28 | 0.043 (3) | 0.031 (2) | 0.037 (3) | 0.002 (2)  | -0.004 (2) | 0.008 (2)    |
| C29 | 0.028 (3) | 0.024 (2) | 0.035 (3) | -0.005 (2) | -0.007 (2) | -0.0005 (18) |
| C30 | 0.027 (3) | 0.085 (4) | 0.041 (3) | 0.002 (3)  | 0.002 (2)  | -0.015 (3)   |

*Geometric parameters (Å, °) for (mo\_2023gu0007\_150k\_0m)*

|          |            |          |           |
|----------|------------|----------|-----------|
| Cu1—O1   | 1.974 (3)  | C6A—H6AC | 0.9600    |
| Cu1—Cu2  | 2.6470 (6) | O7—C7A   | 1.261 (5) |
| Cu1—O3   | 2.004 (3)  | C7A—O8   | 1.258 (5) |
| Cu1—N3   | 2.188 (3)  | C7A—C8A  | 1.513 (6) |
| Cu1—O5   | 1.956 (3)  | C8—H8    | 0.9800    |
| Cu1—O8   | 1.991 (3)  | C8—C9    | 1.517 (6) |
| S1—C6    | 1.739 (5)  | C8—C15   | 1.521 (6) |
| S1—C7    | 1.761 (4)  | C8A—H8AA | 0.9600    |
| O1—C1A   | 1.271 (5)  | C8A—H8AB | 0.9600    |
| N1—C1    | 1.392 (5)  | C8A—H8AC | 0.9600    |
| N1—Cu2   | 2.172 (3)  | C9—C10   | 1.380 (6) |
| N1—C7    | 1.312 (5)  | C9—C14   | 1.389 (7) |
| C1—C2    | 1.395 (6)  | C10—H10  | 0.9300    |
| C1—C6    | 1.405 (5)  | C10—C11  | 1.394 (7) |
| C1A—O2   | 1.248 (5)  | C11—H11  | 0.9300    |
| C1A—C2A  | 1.501 (6)  | C11—C12  | 1.369 (9) |
| Cu2—O2   | 1.990 (3)  | C12—H12  | 0.9300    |
| Cu2—O4   | 1.957 (3)  | C12—C13  | 1.364 (9) |
| Cu2—O6   | 1.998 (3)  | C13—H13  | 0.9300    |
| Cu2—O7   | 1.965 (3)  | C13—C14  | 1.390 (7) |
| S2—C21   | 1.741 (5)  | C14—H14  | 0.9300    |
| S2—C22   | 1.754 (4)  | C15—H15A | 0.9600    |
| N2—H2    | 0.8600     | C15—H15B | 0.9600    |
| N2—C7    | 1.329 (5)  | C15—H15C | 0.9600    |
| N2—C8    | 1.458 (6)  | C16—C17  | 1.393 (7) |
| C2—H2A   | 0.9300     | C16—C21  | 1.408 (5) |
| C2—C3    | 1.383 (6)  | C17—H17  | 0.9300    |
| C2A—H2AA | 0.9600     | C17—C18  | 1.374 (6) |
| C2A—H2AB | 0.9600     | C18—H18  | 0.9300    |
| C2A—H2AC | 0.9600     | C18—C19  | 1.382 (6) |
| O3—C3A   | 1.266 (5)  | C19—H19  | 0.9300    |
| N3—C16   | 1.385 (5)  | C19—C20  | 1.376 (7) |
| N3—C22   | 1.306 (6)  | C20—H20  | 0.9300    |

|            |             |               |           |
|------------|-------------|---------------|-----------|
| C3—H3      | 0.9300      | C20—C21       | 1.382 (6) |
| C3—C4      | 1.400 (6)   | C23—H23       | 0.9800    |
| C3A—O4     | 1.250 (5)   | C23—C24       | 1.521 (6) |
| C3A—C4A    | 1.509 (6)   | C23—C30       | 1.524 (7) |
| N4—H4      | 0.8600      | C24—C25       | 1.395 (6) |
| N4—C22     | 1.340 (6)   | C24—C29       | 1.389 (6) |
| N4—C23     | 1.449 (6)   | C25—H25       | 0.9300    |
| C4—H4A     | 0.9300      | C25—C26       | 1.379 (7) |
| C4—C5      | 1.368 (7)   | C26—H26       | 0.9300    |
| C4A—H4AA   | 0.9600      | C26—C27       | 1.374 (8) |
| C4A—H4AB   | 0.9600      | C27—H27       | 0.9300    |
| C4A—H4AC   | 0.9600      | C27—C28       | 1.377 (7) |
| O5—C5A     | 1.256 (5)   | C28—H28       | 0.9300    |
| C5—H5      | 0.9300      | C28—C29       | 1.375 (6) |
| C5—C6      | 1.389 (6)   | C29—H29       | 0.9300    |
| C5A—O6     | 1.256 (5)   | C30—H30A      | 0.9600    |
| C5A—C6A    | 1.513 (6)   | C30—H30B      | 0.9600    |
| C6A—H6AA   | 0.9600      | C30—H30C      | 0.9600    |
| C6A—H6AB   | 0.9600      |               |           |
|            |             |               |           |
| O1—Cu1—Cu2 | 83.76 (8)   | C7A—O7—Cu2    | 121.5 (3) |
| O1—Cu1—O3  | 87.23 (12)  | N1—C7—S1      | 115.3 (3) |
| O1—Cu1—N3  | 93.51 (13)  | N1—C7—N2      | 124.5 (3) |
| O1—Cu1—O8  | 91.84 (12)  | N2—C7—S1      | 120.2 (3) |
| O3—Cu1—Cu2 | 81.62 (8)   | O7—C7A—C8A    | 116.5 (4) |
| O3—Cu1—N3  | 94.09 (12)  | O8—C7A—O7     | 125.9 (4) |
| N3—Cu1—Cu2 | 175.00 (10) | O8—C7A—C8A    | 117.7 (4) |
| O5—Cu1—O1  | 169.42 (12) | C7A—O8—Cu1    | 121.9 (3) |
| O5—Cu1—Cu2 | 85.89 (8)   | N2—C8—H8      | 108.2     |
| O5—Cu1—O3  | 89.07 (12)  | N2—C8—C9      | 112.4 (4) |
| O5—Cu1—N3  | 96.64 (13)  | N2—C8—C15     | 107.9 (4) |
| O5—Cu1—O8  | 89.04 (13)  | C9—C8—H8      | 108.1     |
| O8—Cu1—Cu2 | 82.71 (8)   | C9—C8—C15     | 111.9 (4) |
| O8—Cu1—O3  | 164.30 (11) | C15—C8—H8     | 108.2     |
| O8—Cu1—N3  | 101.61 (12) | C7A—C8A—H8AA  | 109.5     |
| C6—S1—C7   | 89.2 (2)    | C7A—C8A—H8AB  | 109.5     |
| C1A—O1—Cu1 | 121.5 (3)   | C7A—C8A—H8AC  | 109.5     |
| C1—N1—Cu2  | 125.3 (3)   | H8AA—C8A—H8AB | 109.5     |
| C7—N1—C1   | 110.6 (3)   | H8AA—C8A—H8AC | 109.5     |
| C7—N1—Cu2  | 122.1 (3)   | H8AB—C8A—H8AC | 109.5     |

|               |             |               |           |
|---------------|-------------|---------------|-----------|
| N1—C1—C2      | 125.4 (4)   | C10—C9—C8     | 120.4 (4) |
| N1—C1—C6      | 115.5 (4)   | C10—C9—C14    | 119.2 (4) |
| C2—C1—C6      | 119.1 (4)   | C14—C9—C8     | 120.3 (4) |
| O1—C1A—C2A    | 116.0 (4)   | C9—C10—H10    | 119.9     |
| O2—C1A—O1     | 125.4 (4)   | C9—C10—C11    | 120.1 (6) |
| O2—C1A—C2A    | 118.6 (4)   | C11—C10—H10   | 119.9     |
| N1—Cu2—Cu1    | 177.76 (9)  | C10—C11—H11   | 119.9     |
| O2—Cu2—Cu1    | 82.61 (8)   | C12—C11—C10   | 120.2 (5) |
| O2—Cu2—N1     | 99.63 (12)  | C12—C11—H11   | 119.9     |
| O2—Cu2—O6     | 163.58 (11) | C11—C12—H12   | 120.0     |
| O4—Cu2—Cu1    | 85.00 (8)   | C13—C12—C11   | 119.9 (5) |
| O4—Cu2—N1     | 95.17 (12)  | C13—C12—H12   | 120.0     |
| O4—Cu2—O2     | 88.91 (13)  | C12—C13—H13   | 119.6     |
| O4—Cu2—O6     | 90.03 (13)  | C12—C13—C14   | 120.8 (6) |
| O4—Cu2—O7     | 168.99 (11) | C14—C13—H13   | 119.6     |
| O6—Cu2—Cu1    | 80.98 (8)   | C9—C14—C13    | 119.7 (5) |
| O6—Cu2—N1     | 96.78 (12)  | C9—C14—H14    | 120.2     |
| O7—Cu2—Cu1    | 84.04 (8)   | C13—C14—H14   | 120.2     |
| O7—Cu2—N1     | 95.74 (12)  | C8—C15—H15A   | 109.5     |
| O7—Cu2—O2     | 90.69 (13)  | C8—C15—H15B   | 109.5     |
| O7—Cu2—O6     | 87.24 (13)  | C8—C15—H15C   | 109.5     |
| C21—S2—C22    | 89.0 (2)    | H15A—C15—H15B | 109.5     |
| C1A—O2—Cu2    | 121.8 (3)   | H15A—C15—H15C | 109.5     |
| C7—N2—H2      | 117.6       | H15B—C15—H15C | 109.5     |
| C7—N2—C8      | 124.7 (3)   | N3—C16—C17    | 126.3 (4) |
| C8—N2—H2      | 117.6       | N3—C16—C21    | 115.1 (4) |
| C1—C2—H2A     | 120.4       | C17—C16—C21   | 118.6 (4) |
| C3—C2—C1      | 119.2 (4)   | C16—C17—H17   | 120.3     |
| C3—C2—H2A     | 120.4       | C18—C17—C16   | 119.3 (4) |
| C1A—C2A—H2AA  | 109.5       | C18—C17—H17   | 120.3     |
| C1A—C2A—H2AB  | 109.5       | C17—C18—H18   | 119.4     |
| C1A—C2A—H2AC  | 109.5       | C17—C18—C19   | 121.2 (5) |
| H2AA—C2A—H2AB | 109.5       | C19—C18—H18   | 119.4     |
| H2AA—C2A—H2AC | 109.5       | C18—C19—H19   | 119.5     |
| H2AB—C2A—H2AC | 109.5       | C20—C19—C18   | 121.1 (4) |
| C3A—O3—Cu1    | 122.8 (3)   | C20—C19—H19   | 119.5     |
| C16—N3—Cu1    | 124.8 (3)   | C19—C20—H20   | 121.0     |
| C22—N3—Cu1    | 122.8 (3)   | C19—C20—C21   | 118.1 (4) |
| C22—N3—C16    | 110.8 (3)   | C21—C20—H20   | 121.0     |
| C2—C3—H3      | 119.6       | C16—C21—S2    | 109.3 (3) |

|                    |            |               |            |
|--------------------|------------|---------------|------------|
| C2—C3—C4           | 120.8 (5)  | C20—C21—S2    | 128.9 (3)  |
| C4—C3—H3           | 119.6      | C20—C21—C16   | 121.8 (4)  |
| O3—C3A—C4A         | 116.8 (4)  | N3—C22—S2     | 115.7 (3)  |
| O4—C3A—O3          | 125.4 (4)  | N3—C22—N4     | 124.1 (4)  |
| O4—C3A—C4A         | 117.8 (4)  | N4—C22—S2     | 120.2 (3)  |
| C3A—O4—Cu2         | 121.3 (3)  | N4—C23—H23    | 107.8      |
| C22—N4—H4          | 117.2      | N4—C23—C24    | 113.3 (4)  |
| C22—N4—C23         | 125.5 (4)  | N4—C23—C30    | 107.6 (4)  |
| C23—N4—H4          | 117.2      | C24—C23—H23   | 107.8      |
| C3—C4—H4A          | 119.6      | C24—C23—C30   | 112.2 (4)  |
| C5—C4—C3           | 120.9 (4)  | C30—C23—H23   | 107.8      |
| C5—C4—H4A          | 119.6      | C25—C24—C23   | 119.1 (4)  |
| C3A—C4A—H4AA       | 109.5      | C29—C24—C23   | 122.4 (4)  |
| C3A—C4A—H4AB       | 109.5      | C29—C24—C25   | 118.5 (4)  |
| C3A—C4A—H4AC       | 109.5      | C24—C25—H25   | 119.8      |
| H4AA—C4A—H4AB      | 109.5      | C26—C25—C24   | 120.5 (5)  |
| H4AA—C4A—H4AC      | 109.5      | C26—C25—H25   | 119.8      |
| H4AB—C4A—H4AC      | 109.5      | C25—C26—H26   | 119.8      |
| C5A—O5—Cu1         | 120.1 (3)  | C27—C26—C25   | 120.3 (5)  |
| C4—C5—H5           | 120.7      | C27—C26—H26   | 119.8      |
| C4—C5—C6           | 118.6 (4)  | C26—C27—H27   | 120.2      |
| C6—C5—H5           | 120.7      | C26—C27—C28   | 119.6 (5)  |
| O5—C5A—O6          | 125.8 (4)  | C28—C27—H27   | 120.2      |
| O5—C5A—C6A         | 116.8 (4)  | C27—C28—H28   | 119.6      |
| O6—C5A—C6A         | 117.4 (4)  | C29—C28—C27   | 120.7 (5)  |
| C5A—O6—Cu2         | 124.0 (3)  | C29—C28—H28   | 119.6      |
| C1—C6—S1           | 109.3 (3)  | C24—C29—H29   | 119.8      |
| C5—C6—S1           | 129.2 (3)  | C28—C29—C24   | 120.4 (4)  |
| C5—C6—C1           | 121.5 (4)  | C28—C29—H29   | 119.8      |
| C5A—C6A—H6AA       | 109.5      | C23—C30—H30A  | 109.5      |
| C5A—C6A—H6AB       | 109.5      | C23—C30—H30B  | 109.5      |
| C5A—C6A—H6AC       | 109.5      | C23—C30—H30C  | 109.5      |
| H6AA—C6A—H6AB      | 109.5      | H30A—C30—H30B | 109.5      |
| H6AA—C6A—H6AC      | 109.5      | H30A—C30—H30C | 109.5      |
| H6AB—C6A—H6AC      | 109.5      | H30B—C30—H30C | 109.5      |
|                    |            |               |            |
| Cu1—O1—C1A—O2      | 5.7 (6)    | C7—N1—C1—C2   | -178.3 (4) |
| Cu1—O1—C1A—<br>C2A | -175.2 (3) | C7—N1—C1—C6   | 2.4 (5)    |
| Cu1—O3—C3A—O4      | 8.3 (6)    | C7—N2—C8—C9   | -66.3 (5)  |



|                |             |                 |            |
|----------------|-------------|-----------------|------------|
| Cu1—O3—C3A—C4A | -173.2 (3)  | C7—N2—C8—C15    | 169.8 (4)  |
| Cu1—N3—C16—C17 | 17.7 (5)    | C8—N2—C7—S1     | 0.1 (5)    |
| Cu1—N3—C16—C21 | -163.6 (3)  | C8—N2—C7—N1     | -179.5 (4) |
| Cu1—N3—C22—S2  | 164.13 (18) | C8—C9—C10—C11   | -177.1 (5) |
| Cu1—N3—C22—N4  | -17.0 (6)   | C8—C9—C14—C13   | 178.2 (5)  |
| Cu1—O5—C5A—O6  | 10.1 (6)    | C8A—C7A—O8—Cu1  | -169.9 (3) |
| Cu1—O5—C5A—C6A | -169.4 (3)  | C9—C10—C11—C12  | -1.1 (9)   |
| O1—C1A—O2—Cu2  | 15.5 (6)    | C10—C9—C14—C13  | -0.8 (8)   |
| N1—C1—C2—C3    | -178.1 (4)  | C10—C11—C12—C13 | -0.9 (9)   |
| N1—C1—C6—S1    | -1.4 (4)    | C11—C12—C13—C14 | 2.0 (9)    |
| N1—C1—C6—C5    | 177.8 (3)   | C12—C13—C14—C9  | -1.1 (8)   |
| C1—N1—C7—S1    | -2.3 (4)    | C14—C9—C10—C11  | 1.9 (8)    |
| C1—N1—C7—N2    | 177.4 (4)   | C15—C8—C9—C10   | 74.6 (6)   |
| C1—C2—C3—C4    | 0.2 (6)     | C15—C8—C9—C14   | -104.4 (5) |
| Cu2—N1—C1—C2   | 17.6 (5)    | C16—N3—C22—S2   | -2.2 (4)   |
| Cu2—N1—C1—C6   | -161.7 (3)  | C16—N3—C22—N4   | 176.7 (4)  |
| Cu2—N1—C7—S1   | 162.39 (18) | C16—C17—C18—C19 | 0.9 (6)    |
| Cu2—N1—C7—N2   | -17.9 (5)   | C17—C16—C21—S2  | 177.3 (3)  |
| Cu2—O7—C7A—O8  | 10.1 (7)    | C17—C16—C21—C20 | -1.9 (6)   |
| Cu2—O7—C7A—C8A | -170.6 (3)  | C17—C18—C19—C20 | -0.8 (7)   |
| N2—C8—C9—C10   | -47.1 (6)   | C18—C19—C20—C21 | -0.7 (7)   |
| N2—C8—C9—C14   | 134.0 (4)   | C19—C20—C21—S2  | -177.0 (3) |
| C2—C1—C6—S1    | 179.3 (3)   | C19—C20—C21—C16 | 2.1 (6)    |
| C2—C1—C6—C5    | -1.5 (6)    | C21—S2—C22—N3   | 1.2 (3)    |
| C2—C3—C4—C5    | -1.2 (7)    | C21—S2—C22—N4   | -177.8 (4) |
| C2A—C1A—O2—Cu2 | -163.5 (3)  | C21—C16—C17—C18 | 0.5 (6)    |
| O3—C3A—O4—Cu2  | 11.0 (6)    | C22—S2—C21—C16  | 0.2 (3)    |
| N3—C16—C17—C18 | 179.1 (4)   | C22—S2—C21—C20  | 179.3 (4)  |
| N3—C16—C21—S2  | -1.5 (4)    | C22—N3—C16—C17  | -176.3 (4) |
| N3—C16—C21—C20 | 179.3 (4)   | C22—N3—C16—C21  | 2.4 (5)    |
| C3—C4—C5—C6    | 0.8 (7)     | C22—N4—C23—C24  | -65.8 (6)  |
| N4—C23—C24—C25 | 160.2 (4)   | C22—N4—C23—C30  | 169.5 (4)  |
| N4—C23—C24—C29 | -20.7 (6)   | C23—N4—C22—S2   | -7.4 (6)   |

|                    |            |                     |            |
|--------------------|------------|---------------------|------------|
| C4—C5—C6—S1        | 179.6 (3)  | C23—N4—C22—N3       | 173.7 (4)  |
| C4—C5—C6—C1        | 0.6 (6)    | C23—C24—C25—<br>C26 | 179.2 (4)  |
| C4A—C3A—O4—<br>Cu2 | -167.5 (3) | C23—C24—C29—<br>C28 | -179.2 (4) |
| O5—C5A—O6—Cu2      | 7.5 (6)    | C24—C25—C26—<br>C27 | 0.4 (8)    |
| C6—S1—C7—N1        | 1.3 (3)    | C25—C24—C29—<br>C28 | 0.0 (7)    |
| C6—S1—C7—N2        | -178.4 (3) | C25—C26—C27—<br>C28 | -0.8 (8)   |
| C6—C1—C2—C3        | 1.1 (6)    | C26—C27—C28—<br>C29 | 0.8 (7)    |
| C6A—C5A—O6—<br>Cu2 | -173.0 (3) | C27—C28—C29—<br>C24 | -0.4 (7)   |
| O7—C7A—O8—Cu1      | 9.4 (7)    | C29—C24—C25—<br>C26 | 0.0 (7)    |
| C7—S1—C6—C1        | 0.1 (3)    | C30—C23—C24—<br>C25 | -77.7 (6)  |
| C7—S1—C6—C5        | -179.0 (4) | C30—C23—C24—<br>C29 | 101.5 (5)  |

Document origin: *publCIF* [Westrip, S. P. (2010). *J. Apply. Cryst.*, **43**, 920-925].

# **$^1\text{H}$ and $^{13}\text{C}$ NMR Spectra**

Exp. 50 DMSO.10.fid  
Exp 50

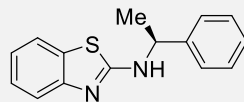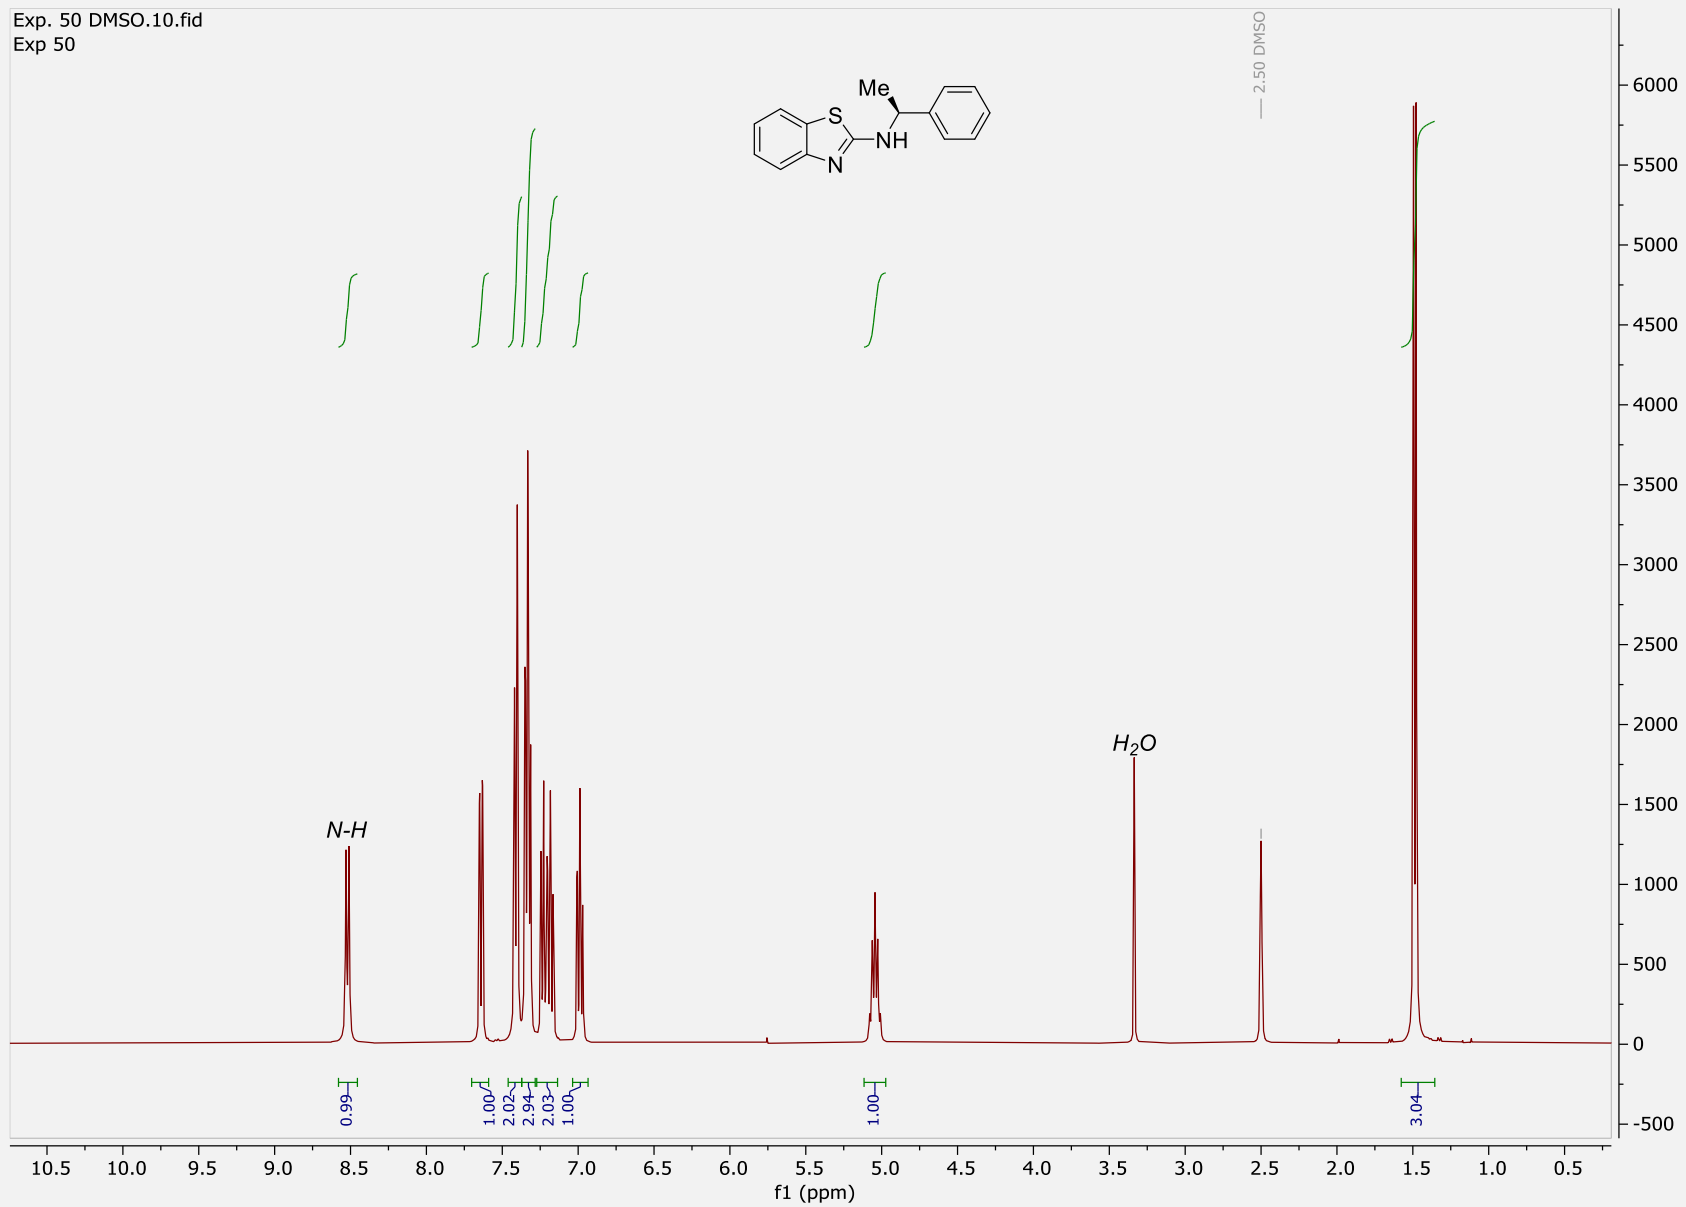

S44

Exp. 50 DMSO\_2.10.fid

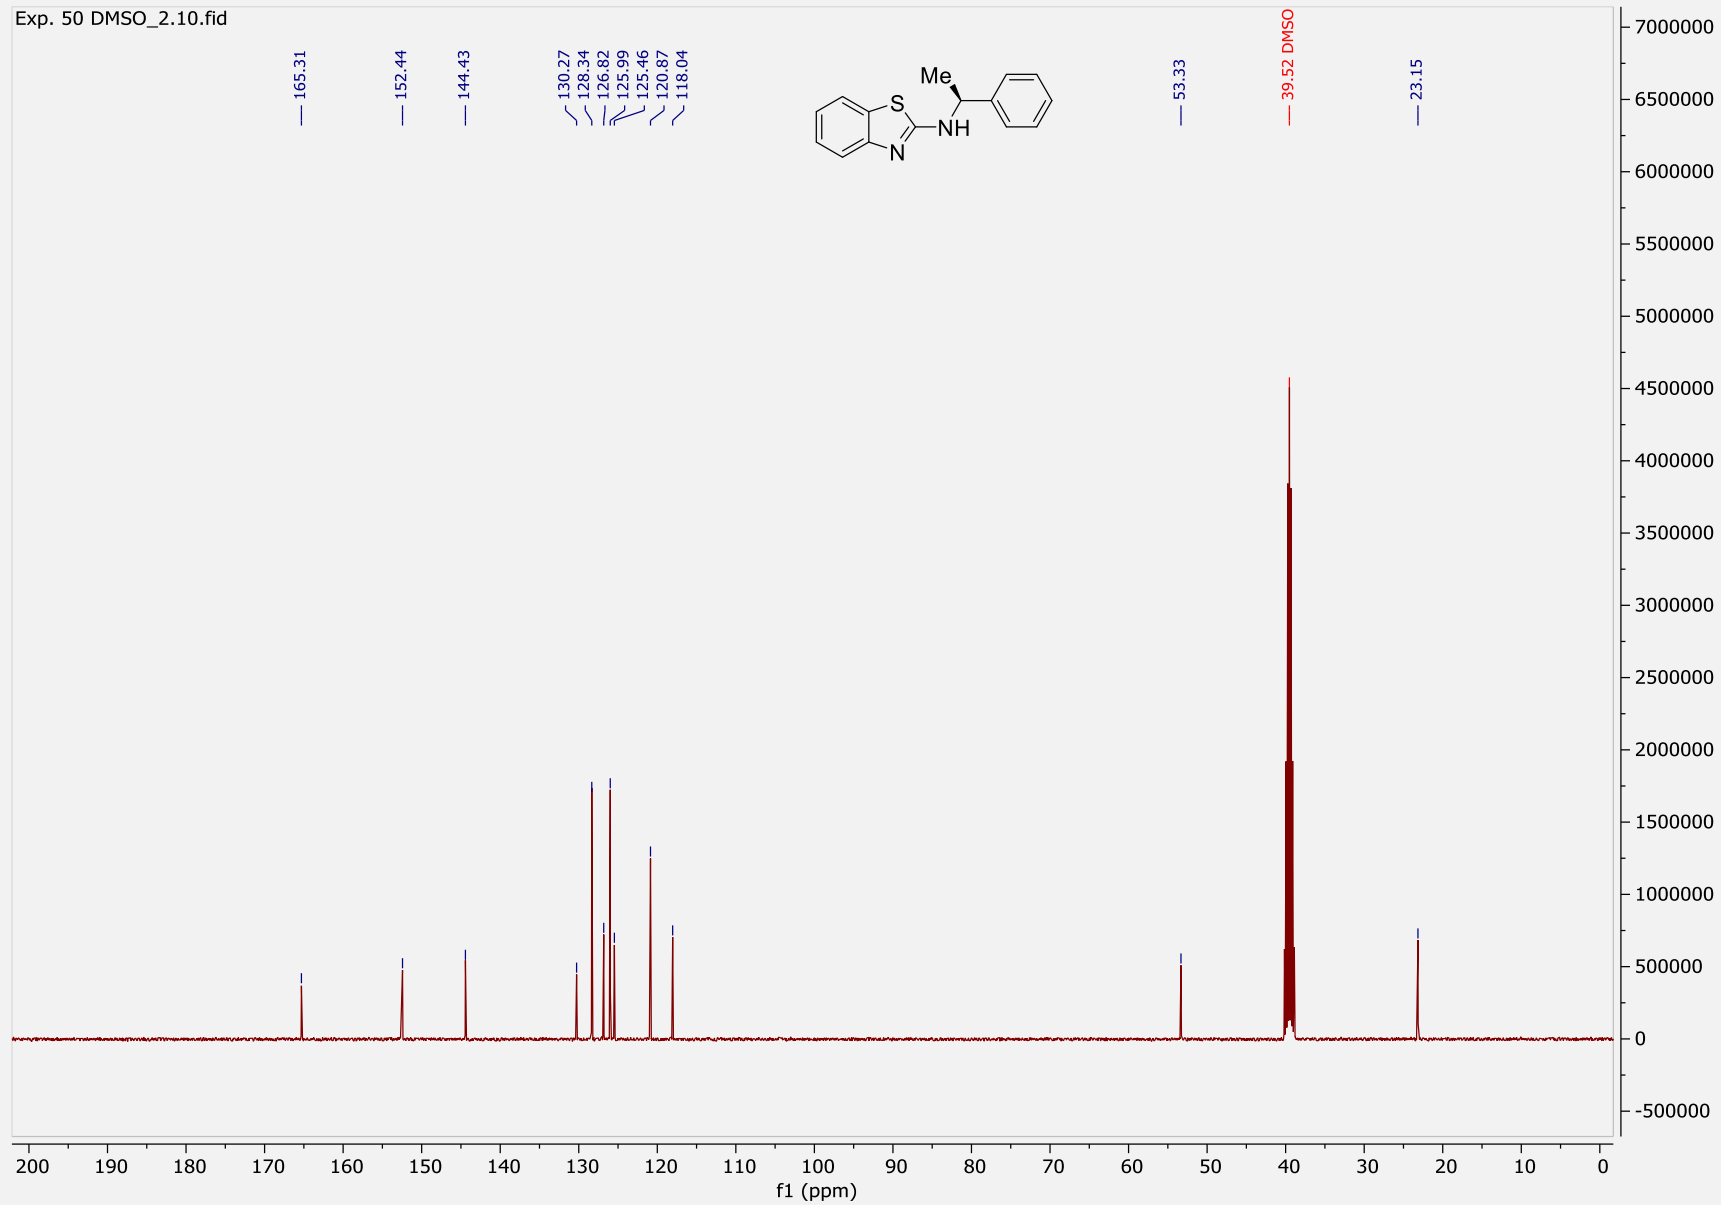

S45

Exp. 51 DMSO.10.fid  
Exp. 51

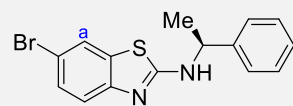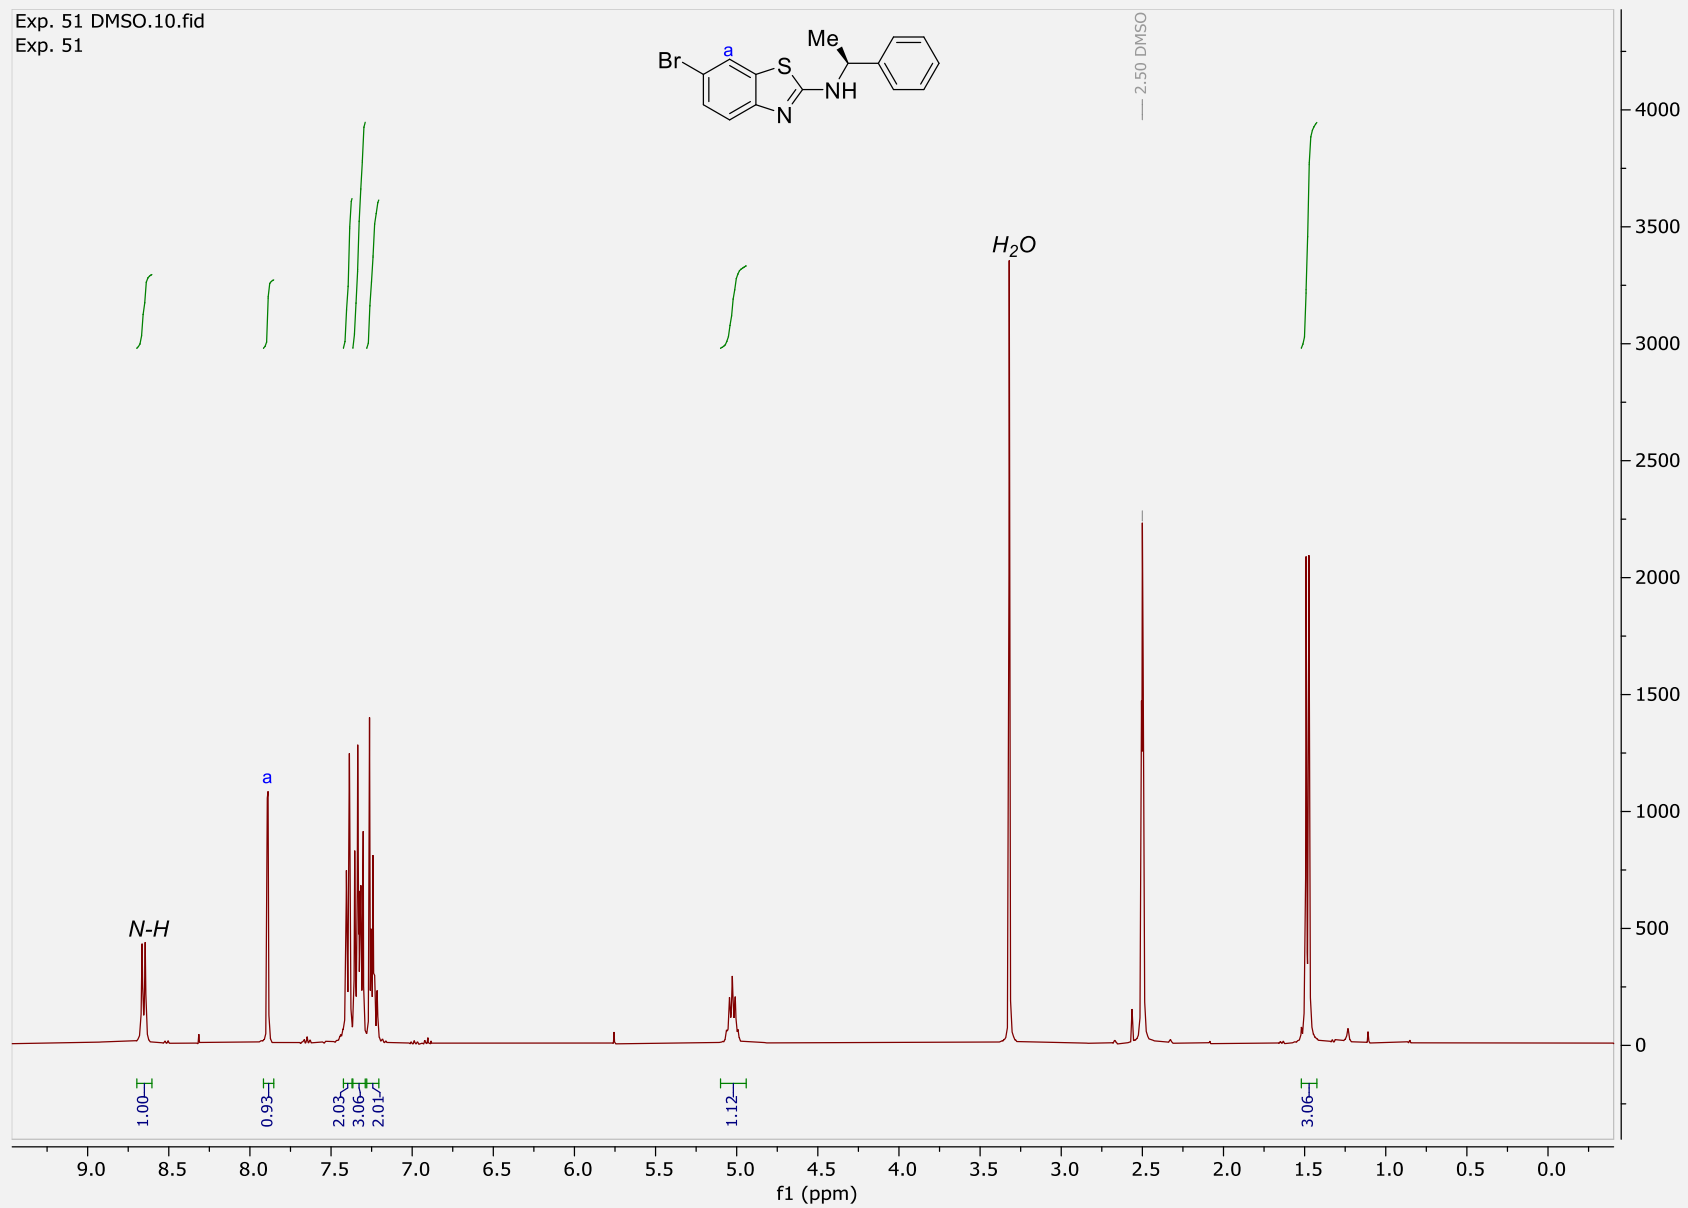

Exp. 51 DMSO\_2.10.fid

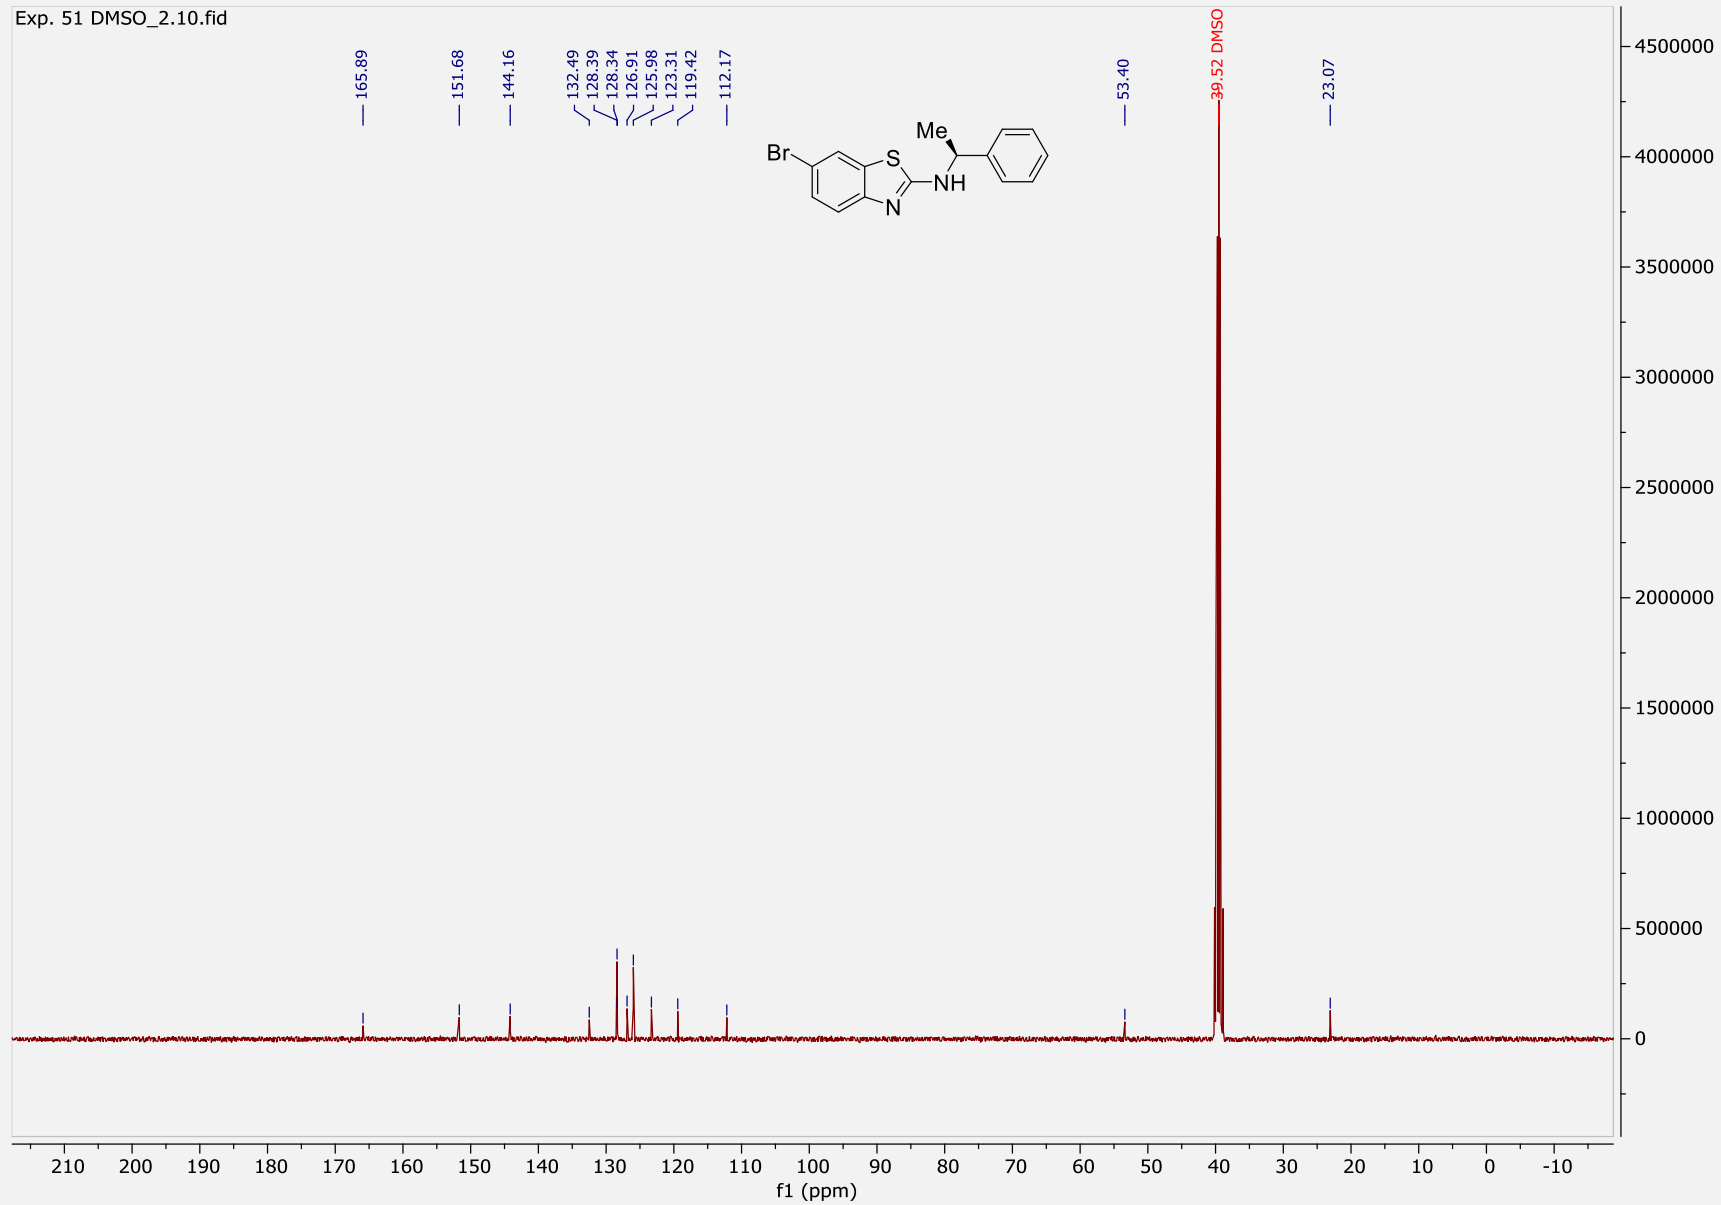

S47

L1CuBrPPh3.10.fid

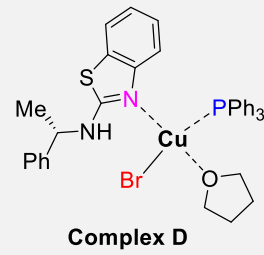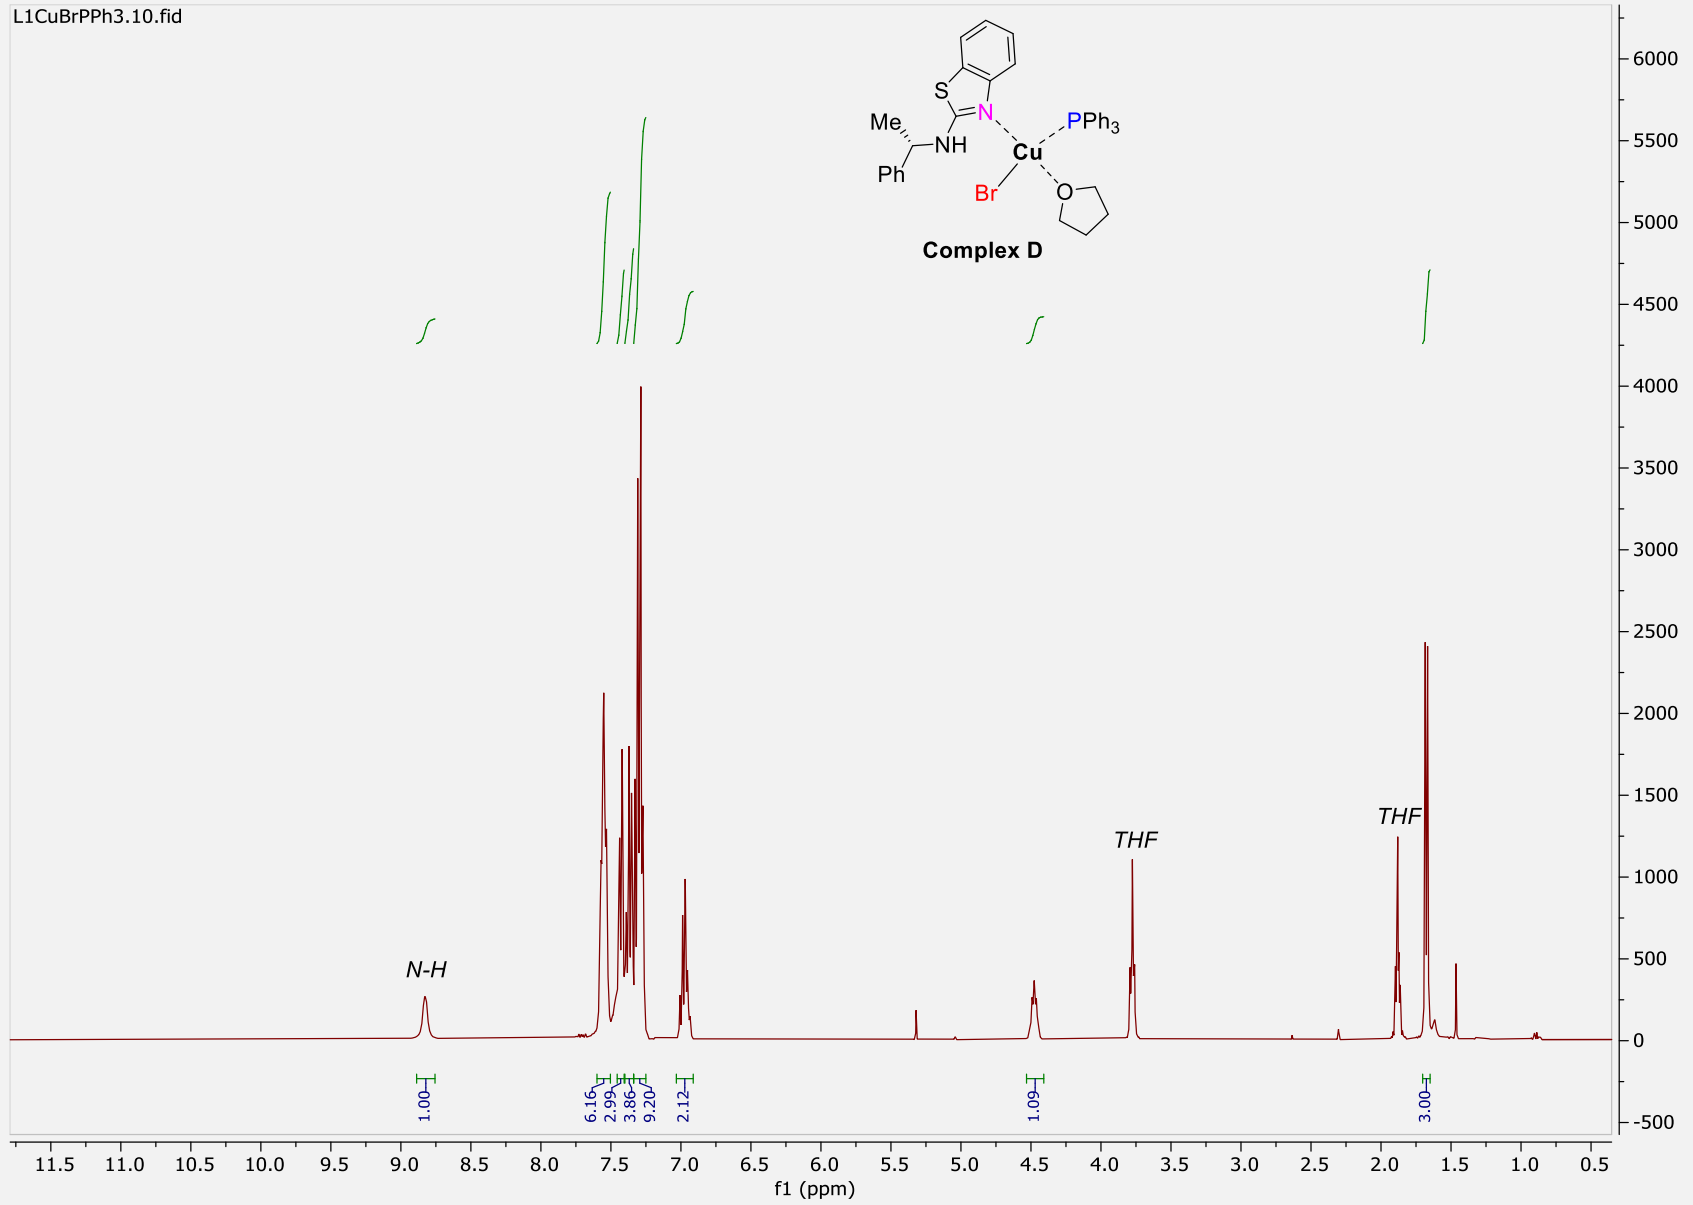

S48



N-H

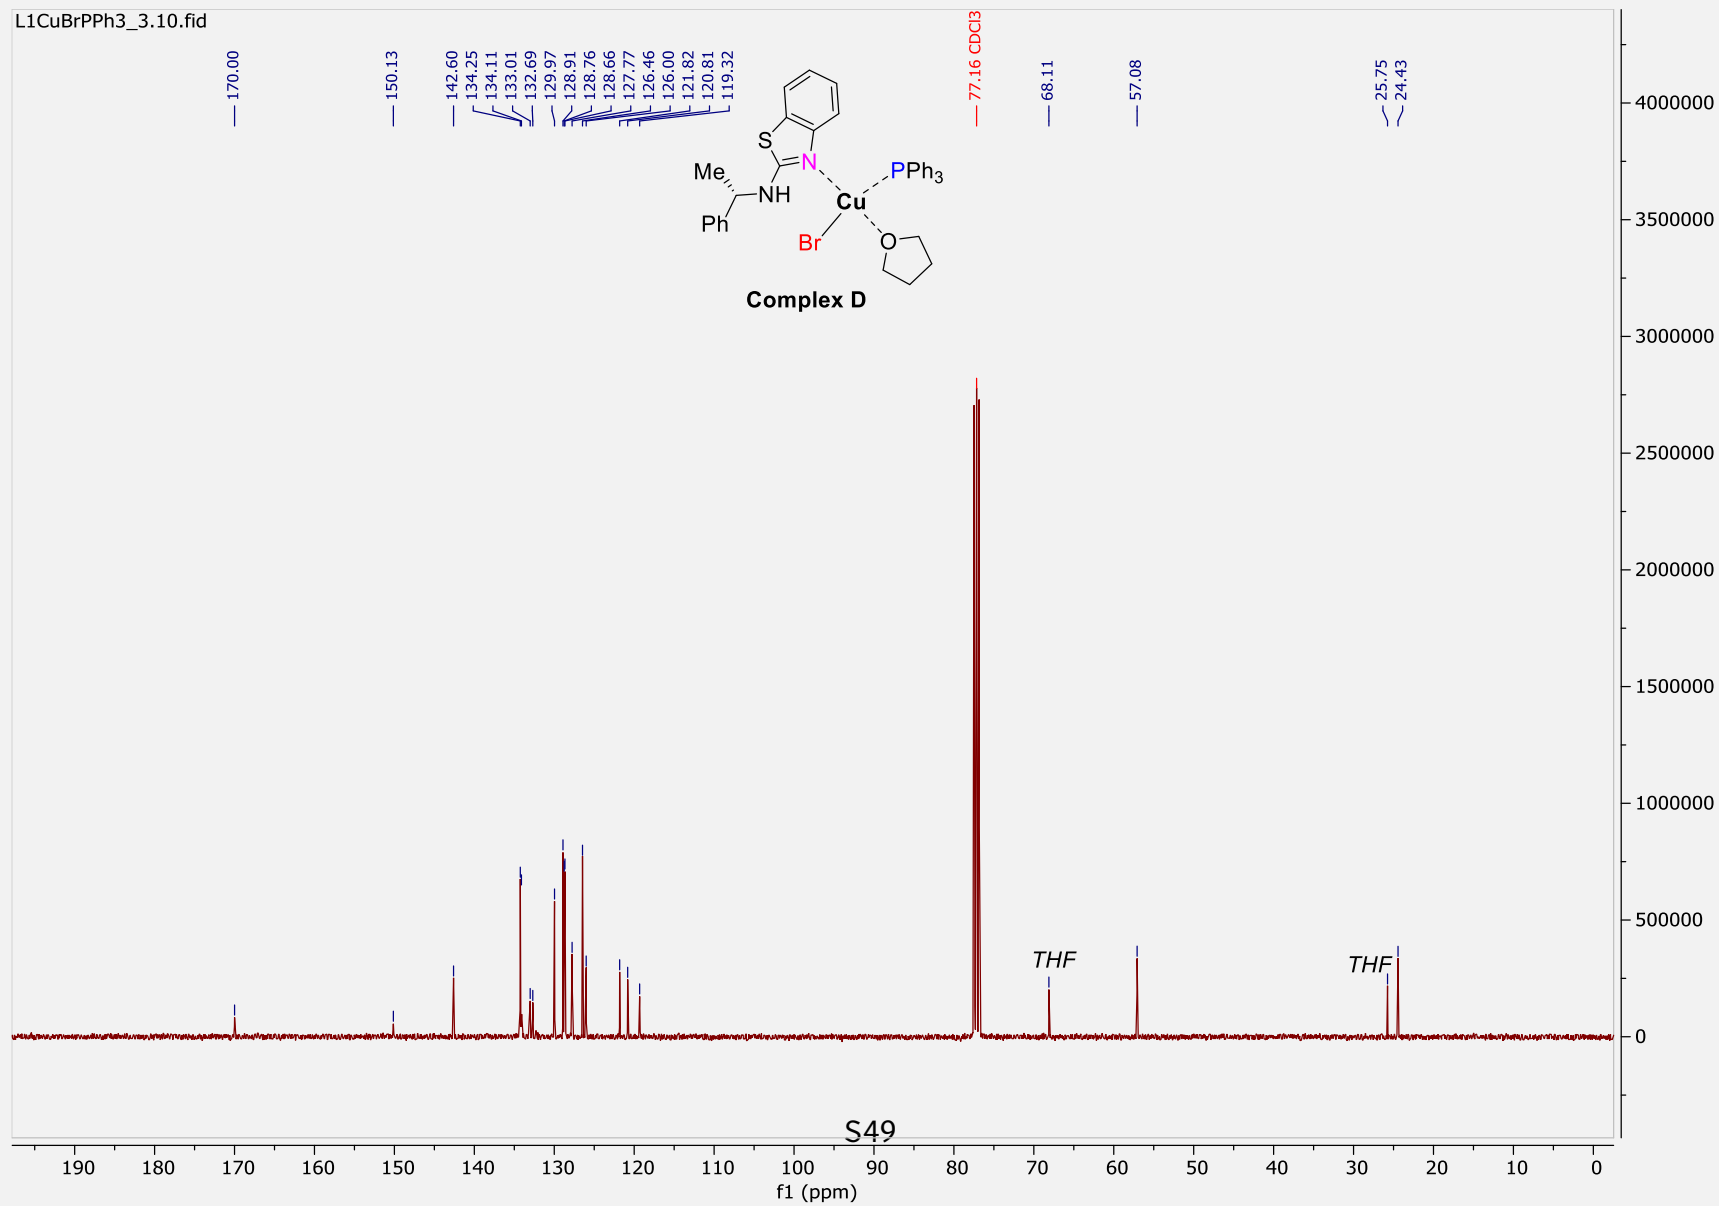

L1CuBrPPh3.11.fid

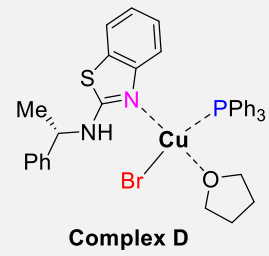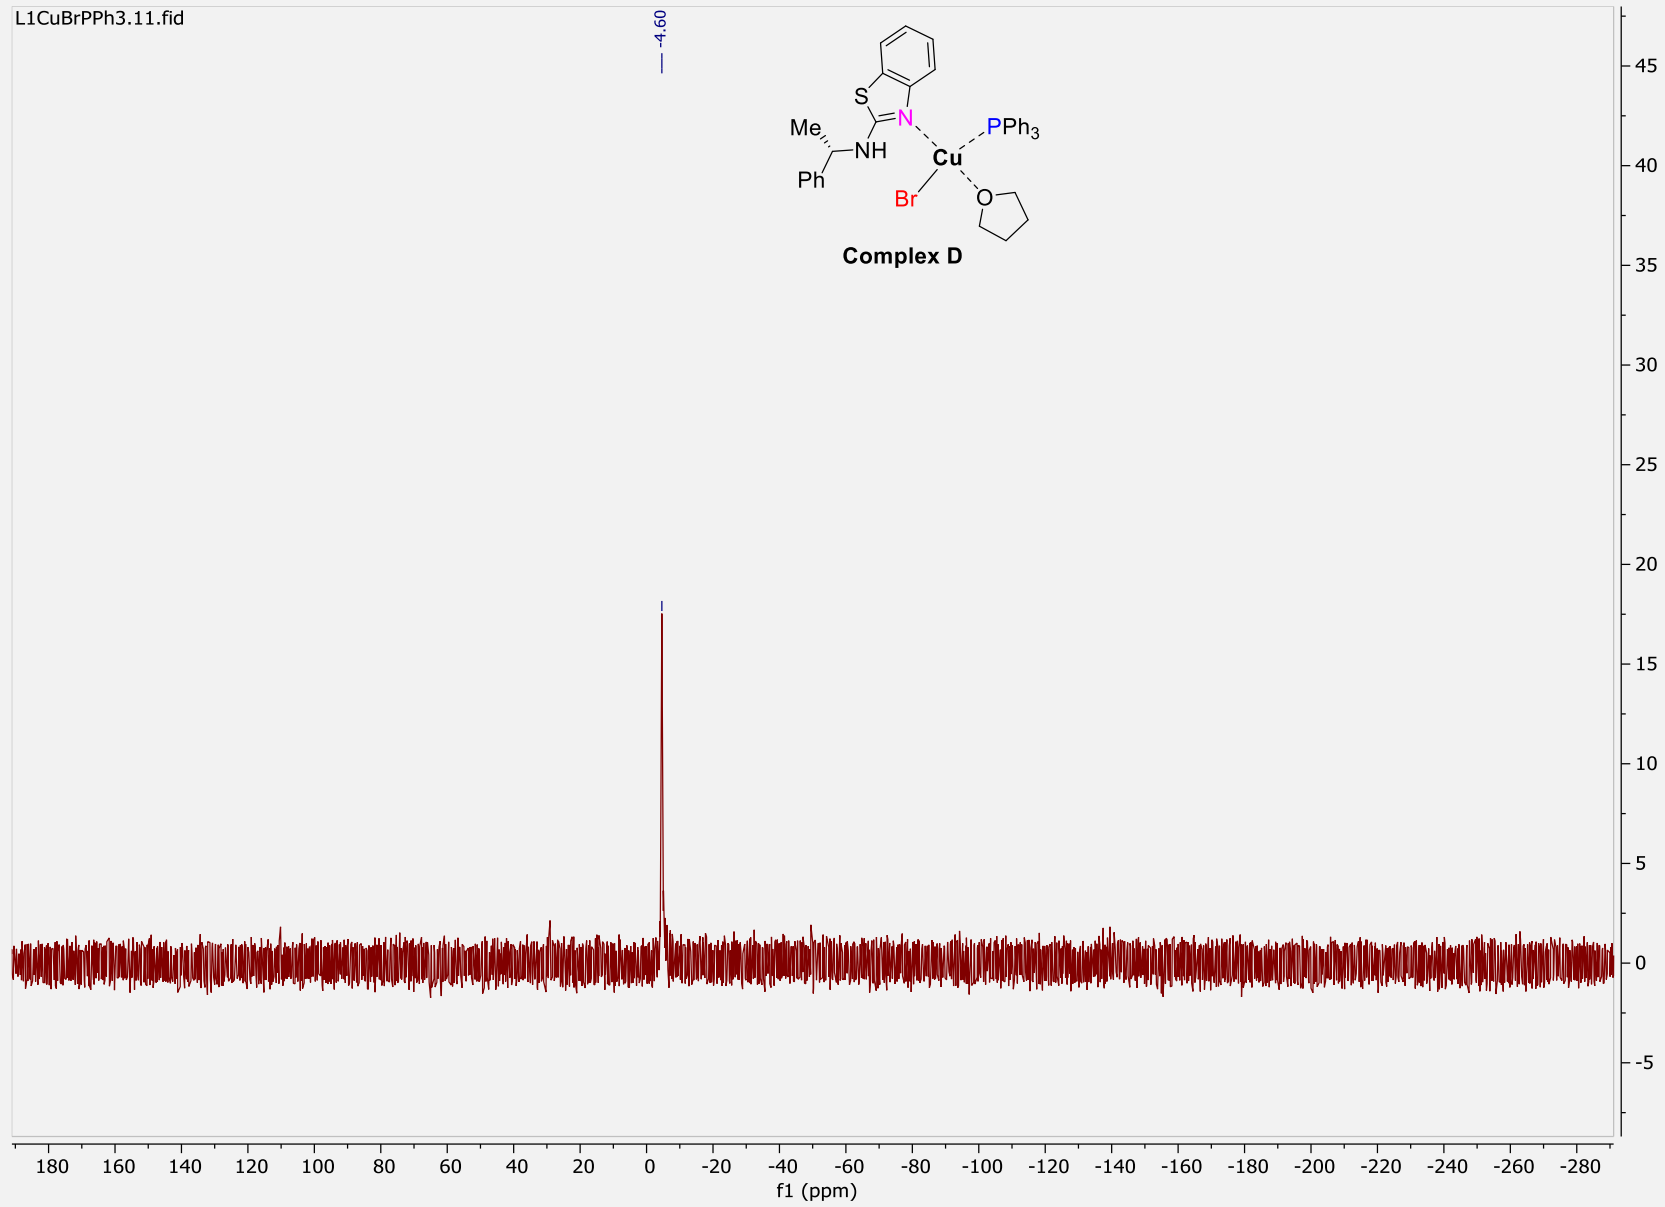

S50

Exp. 92B.40.fid

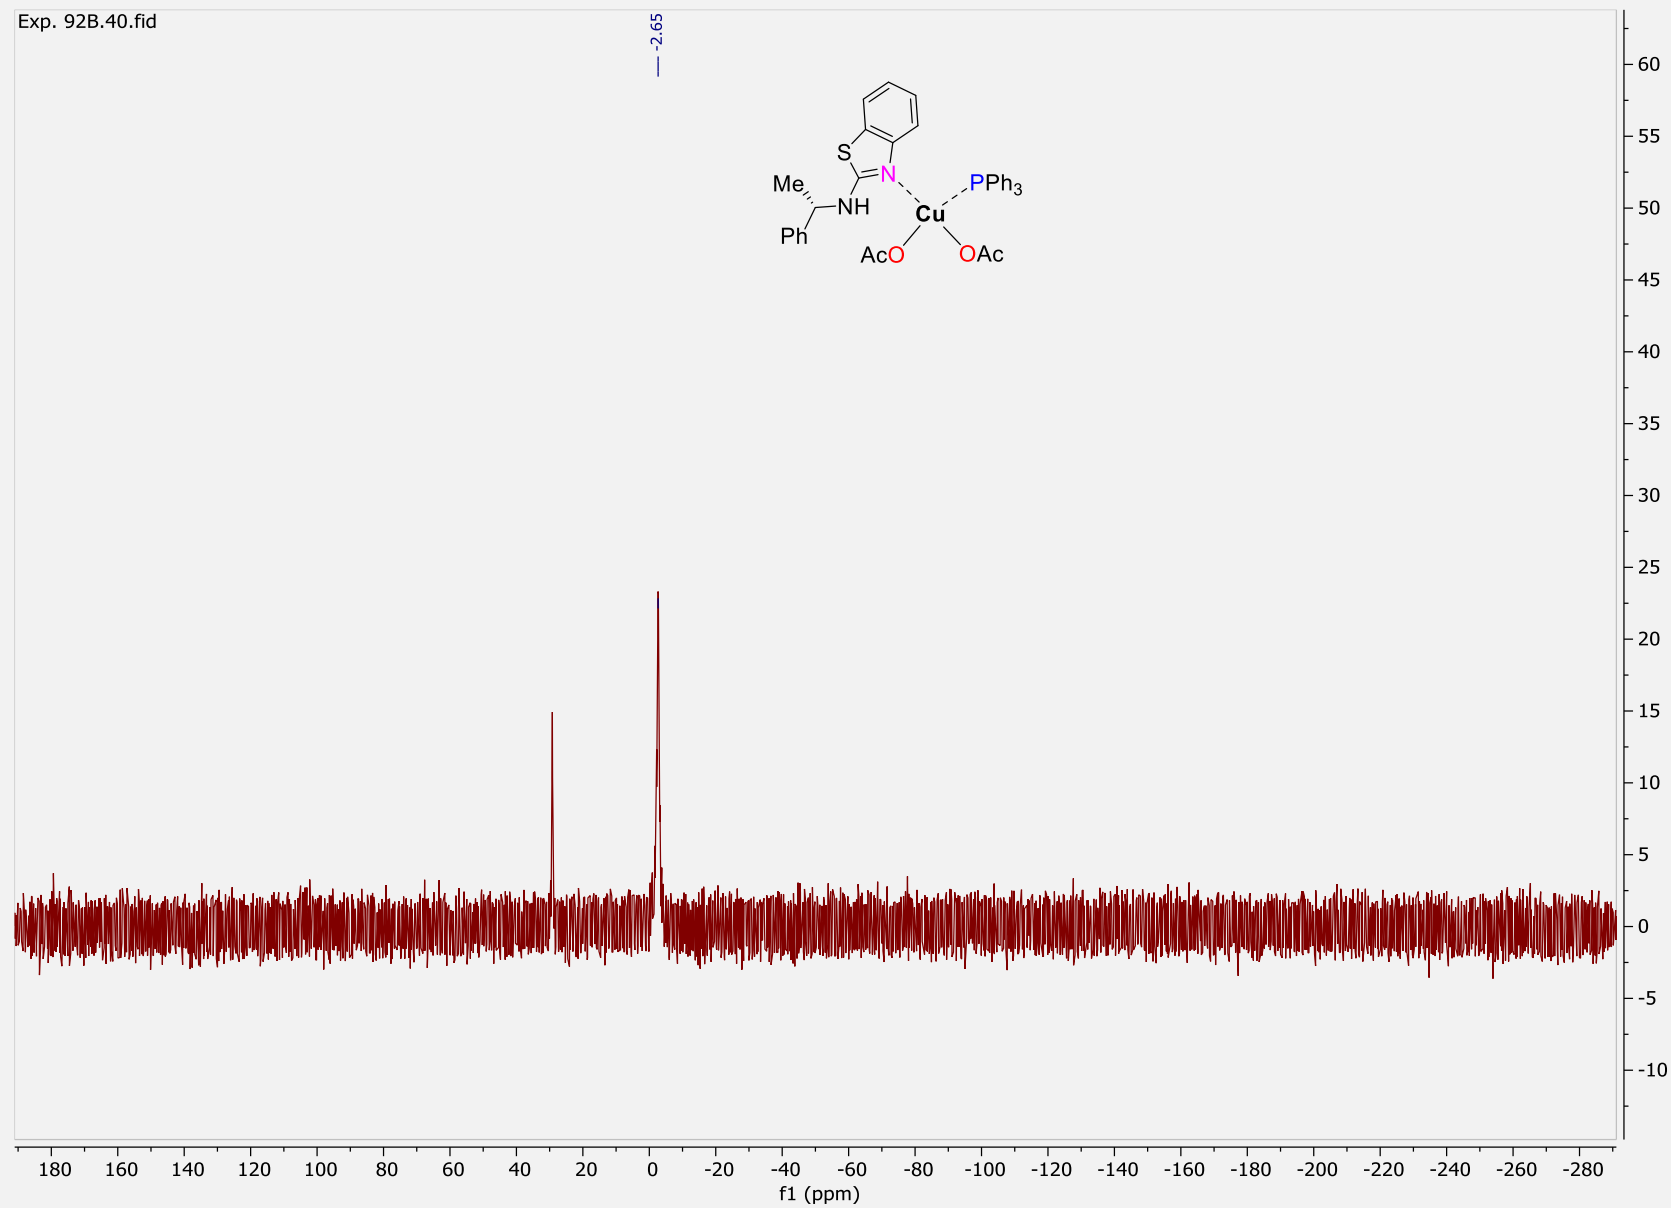

S51

Exp. 91.10.fid

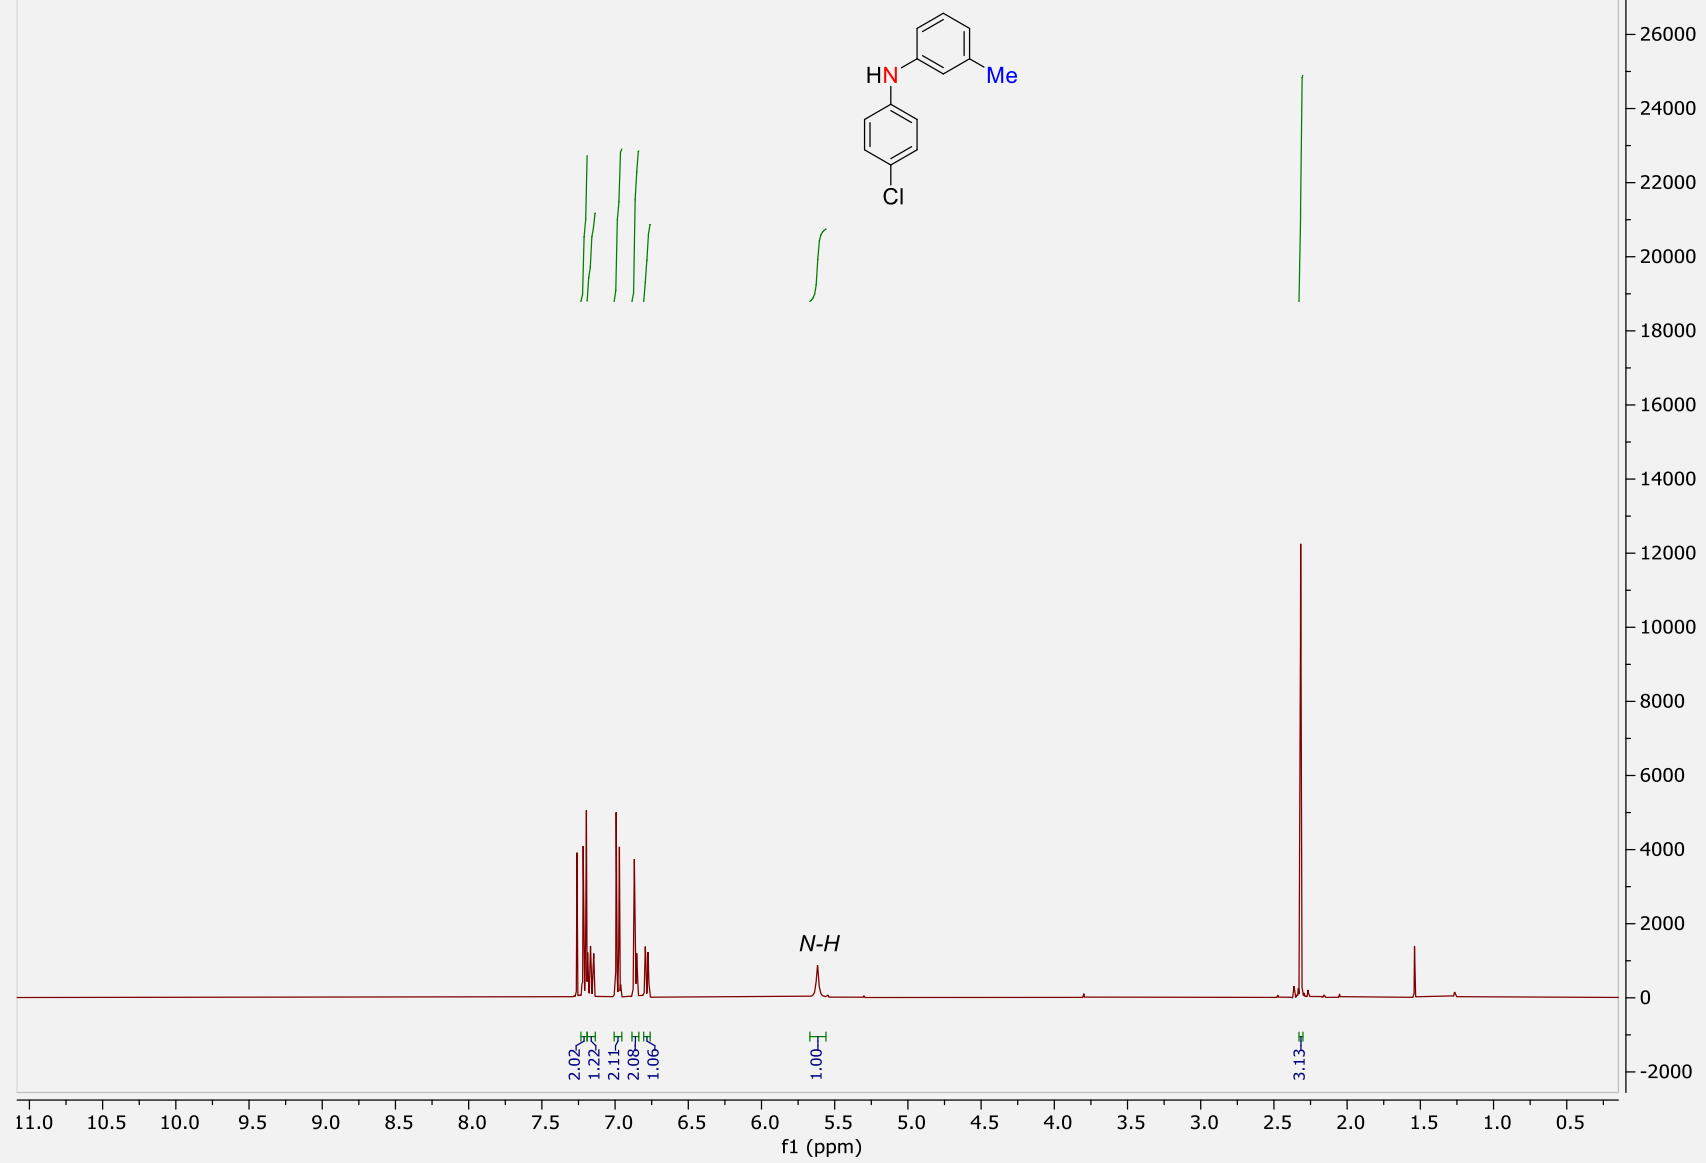

S52

Exp. 91.11.fid

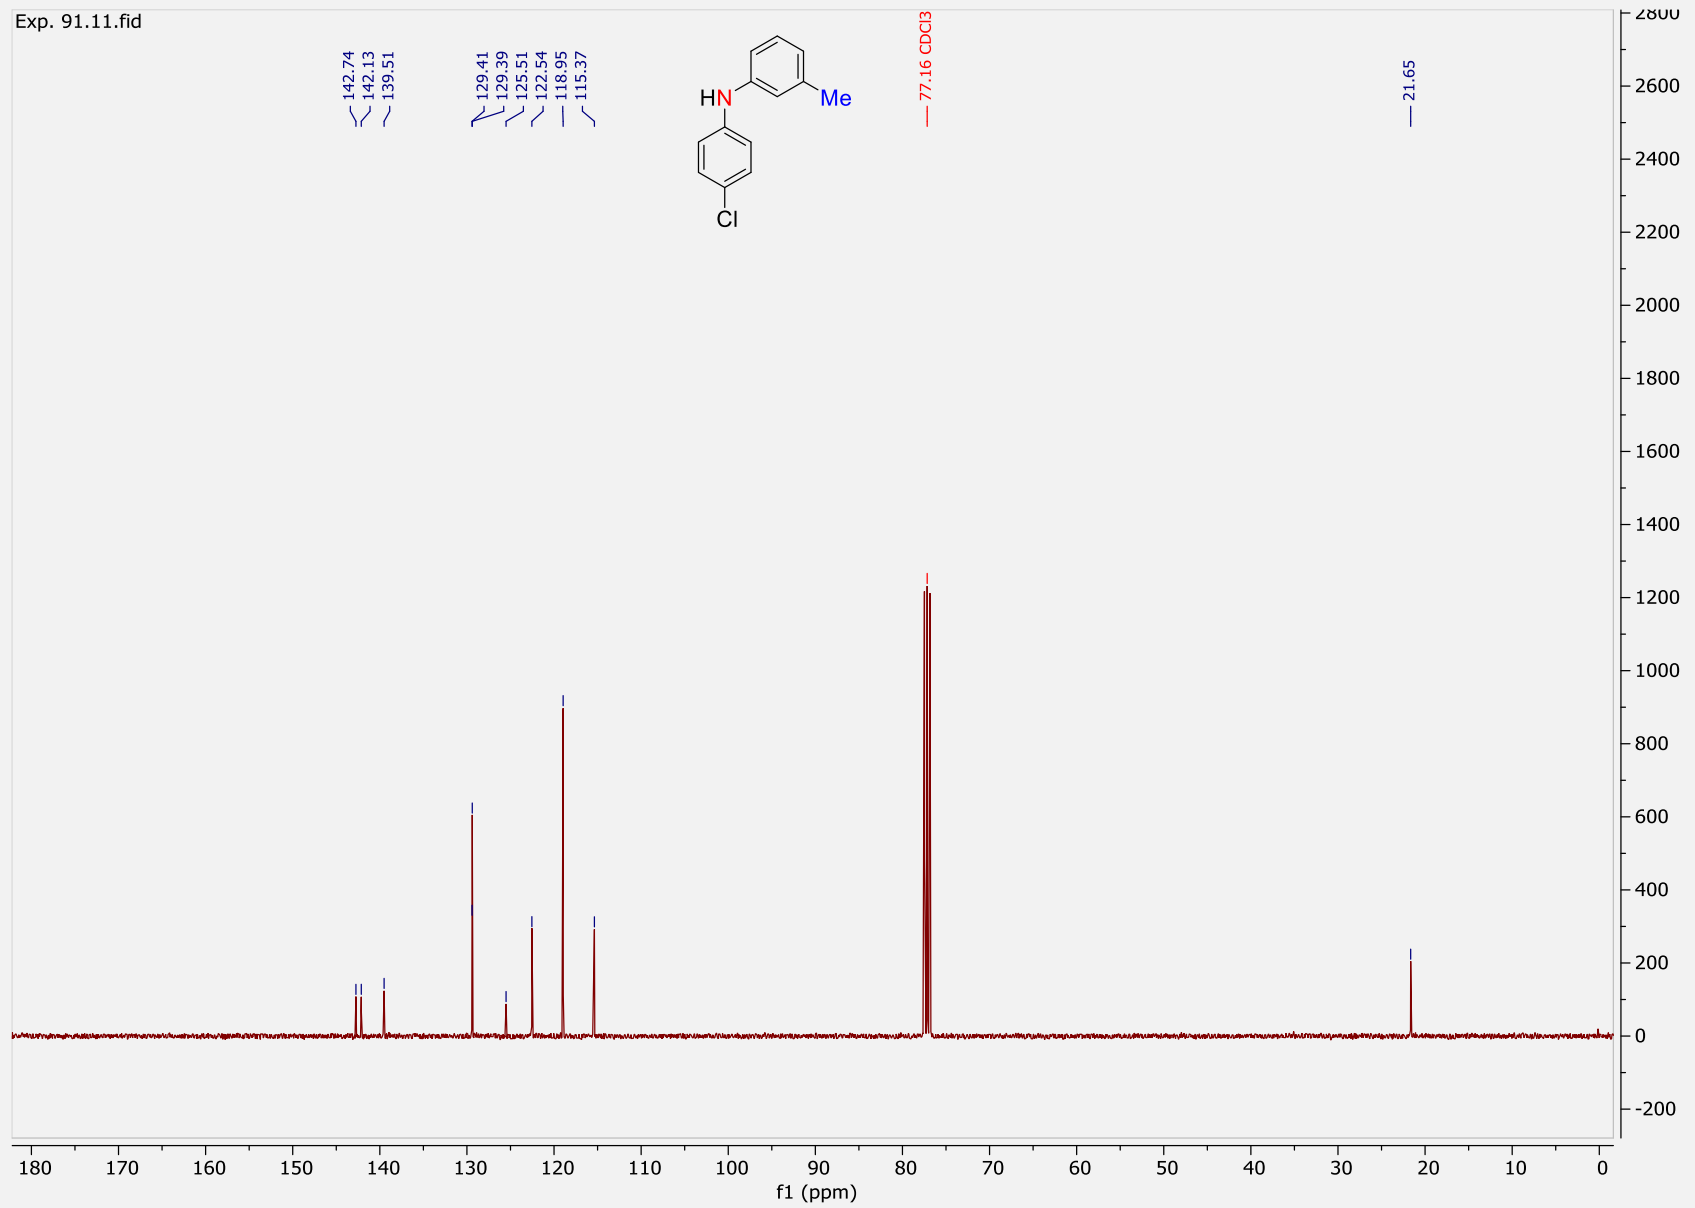

S53

Exp. 93 3-F.10.fid

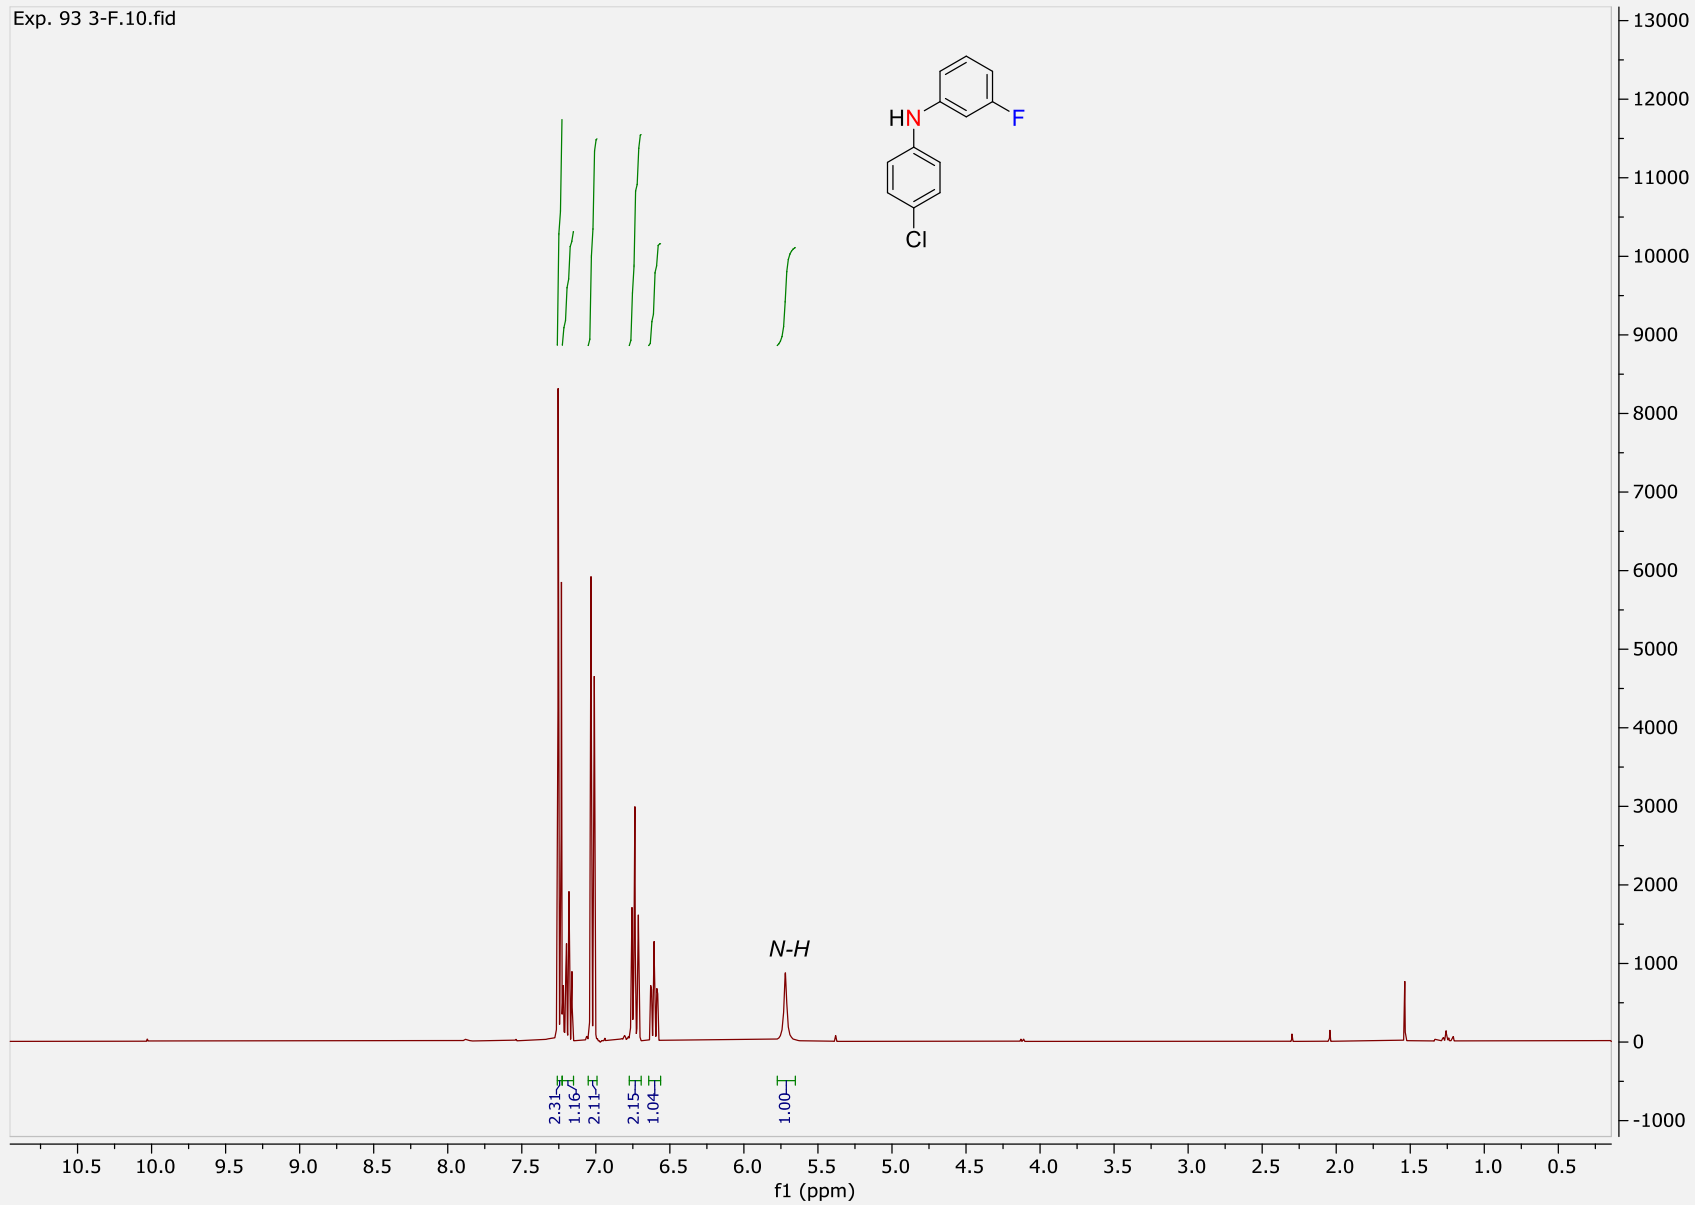

S54

Exp. 93 3-F.11.fid  
user Oluwarotimi Ojo  
C13CPD256.GLA CDCl3 /u oluajo

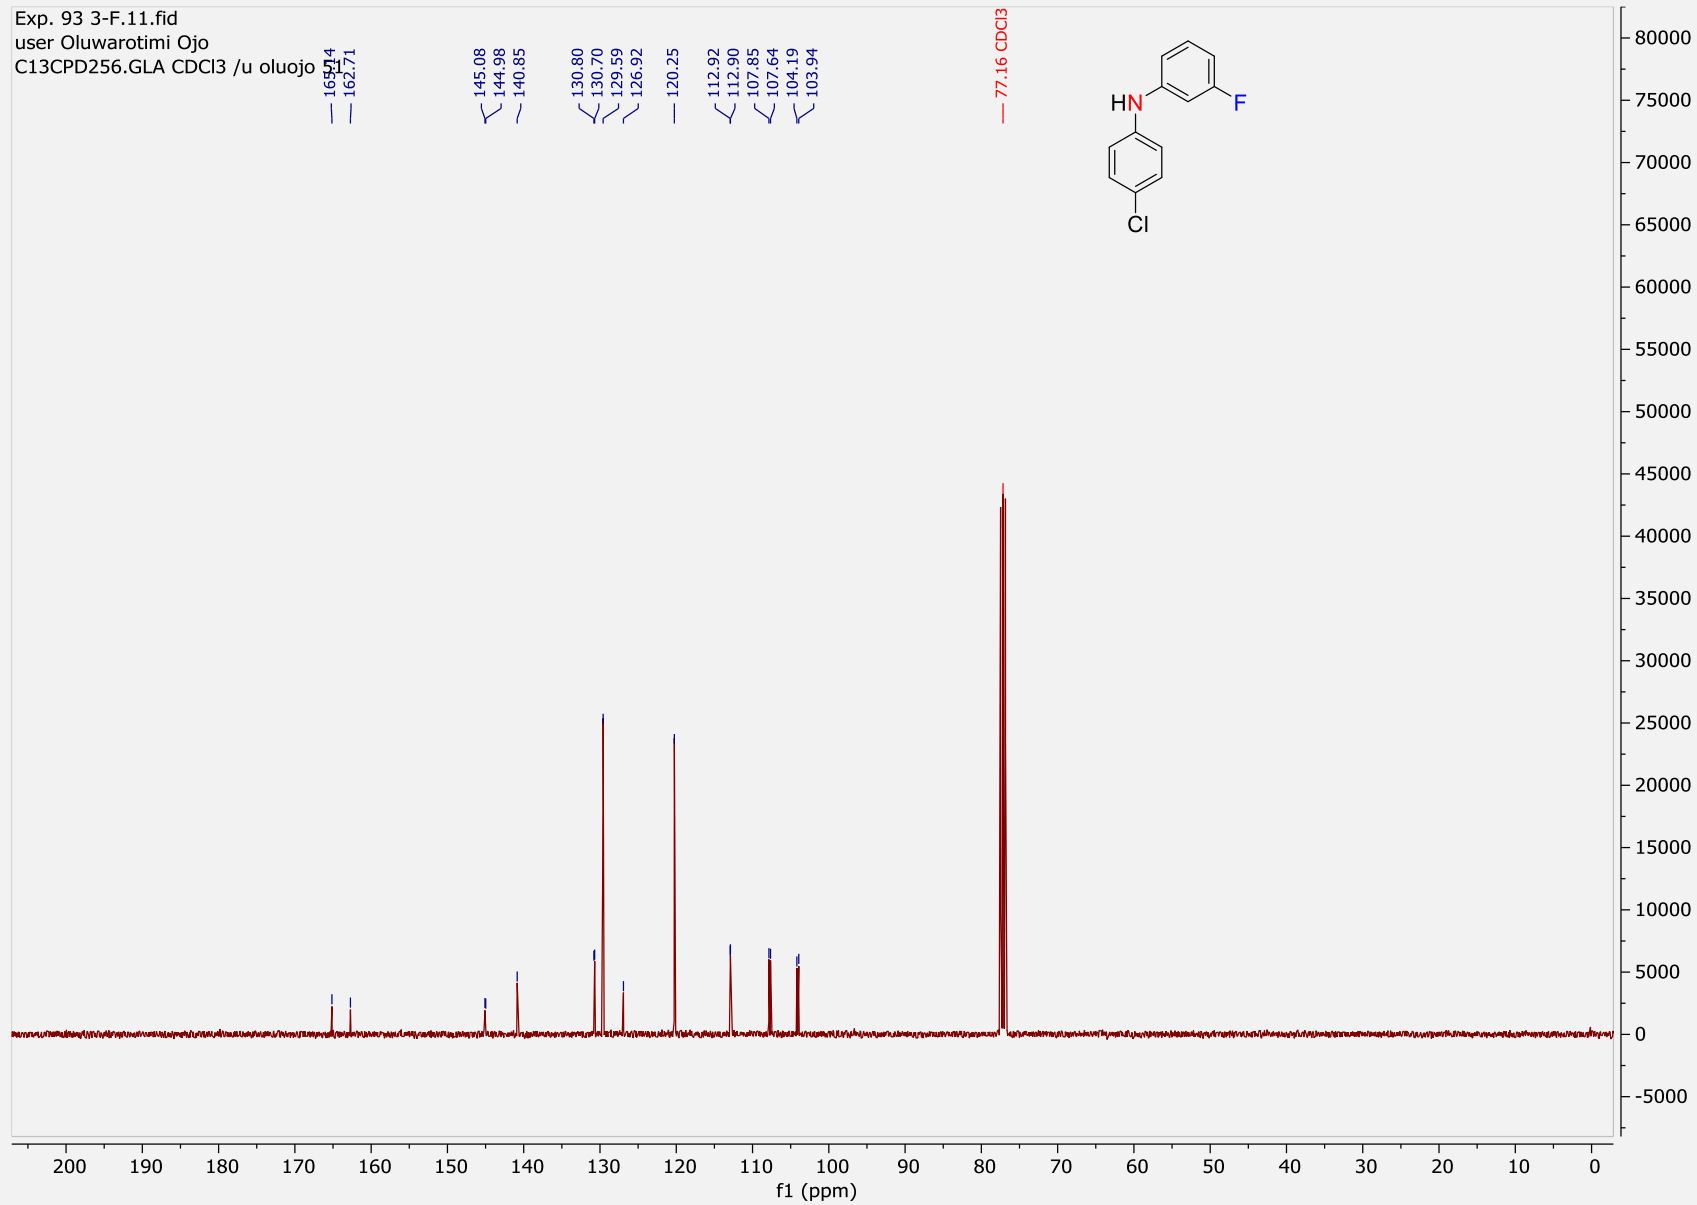

Exp. 93 3-F.10.fid  
user Oluwarotimi Ojo  
F19CPD.GLA CDCl3 /u oluajo 51

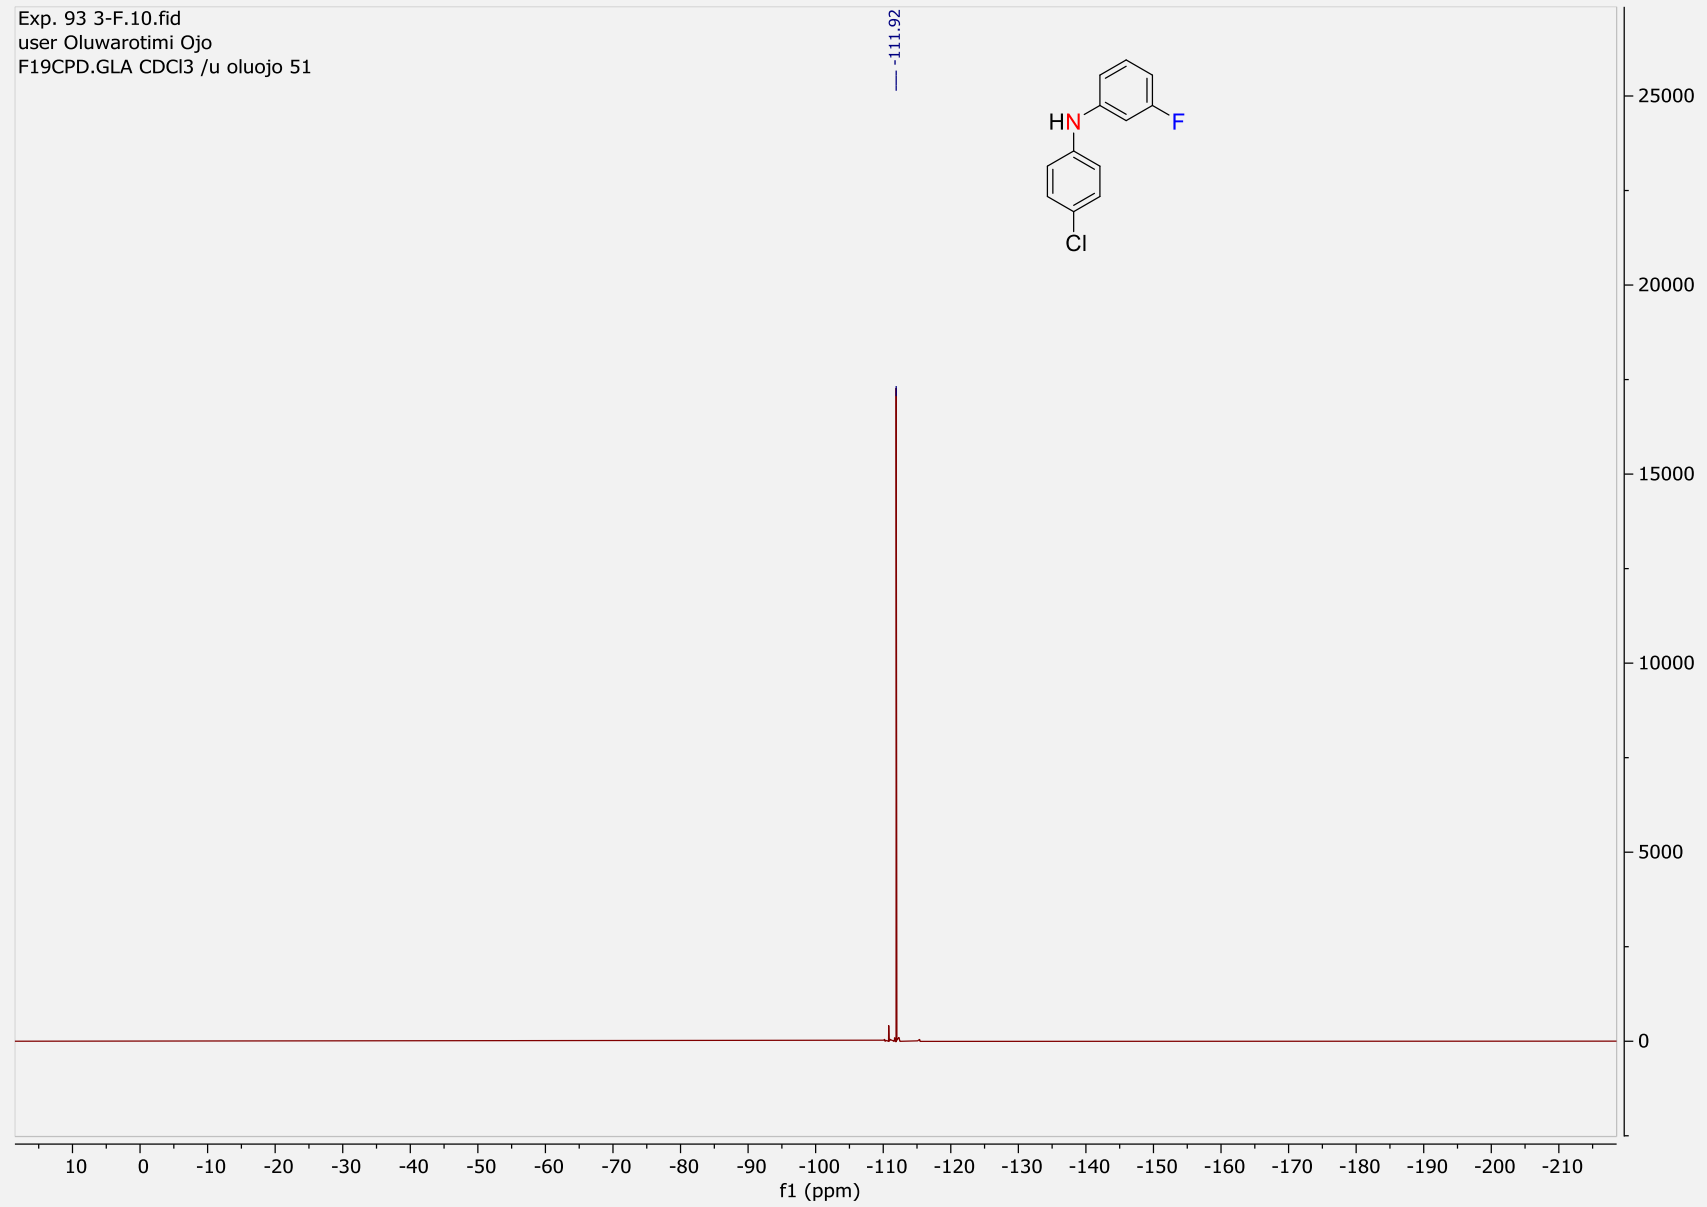

S56



Exp. 93 4-F.10.fid

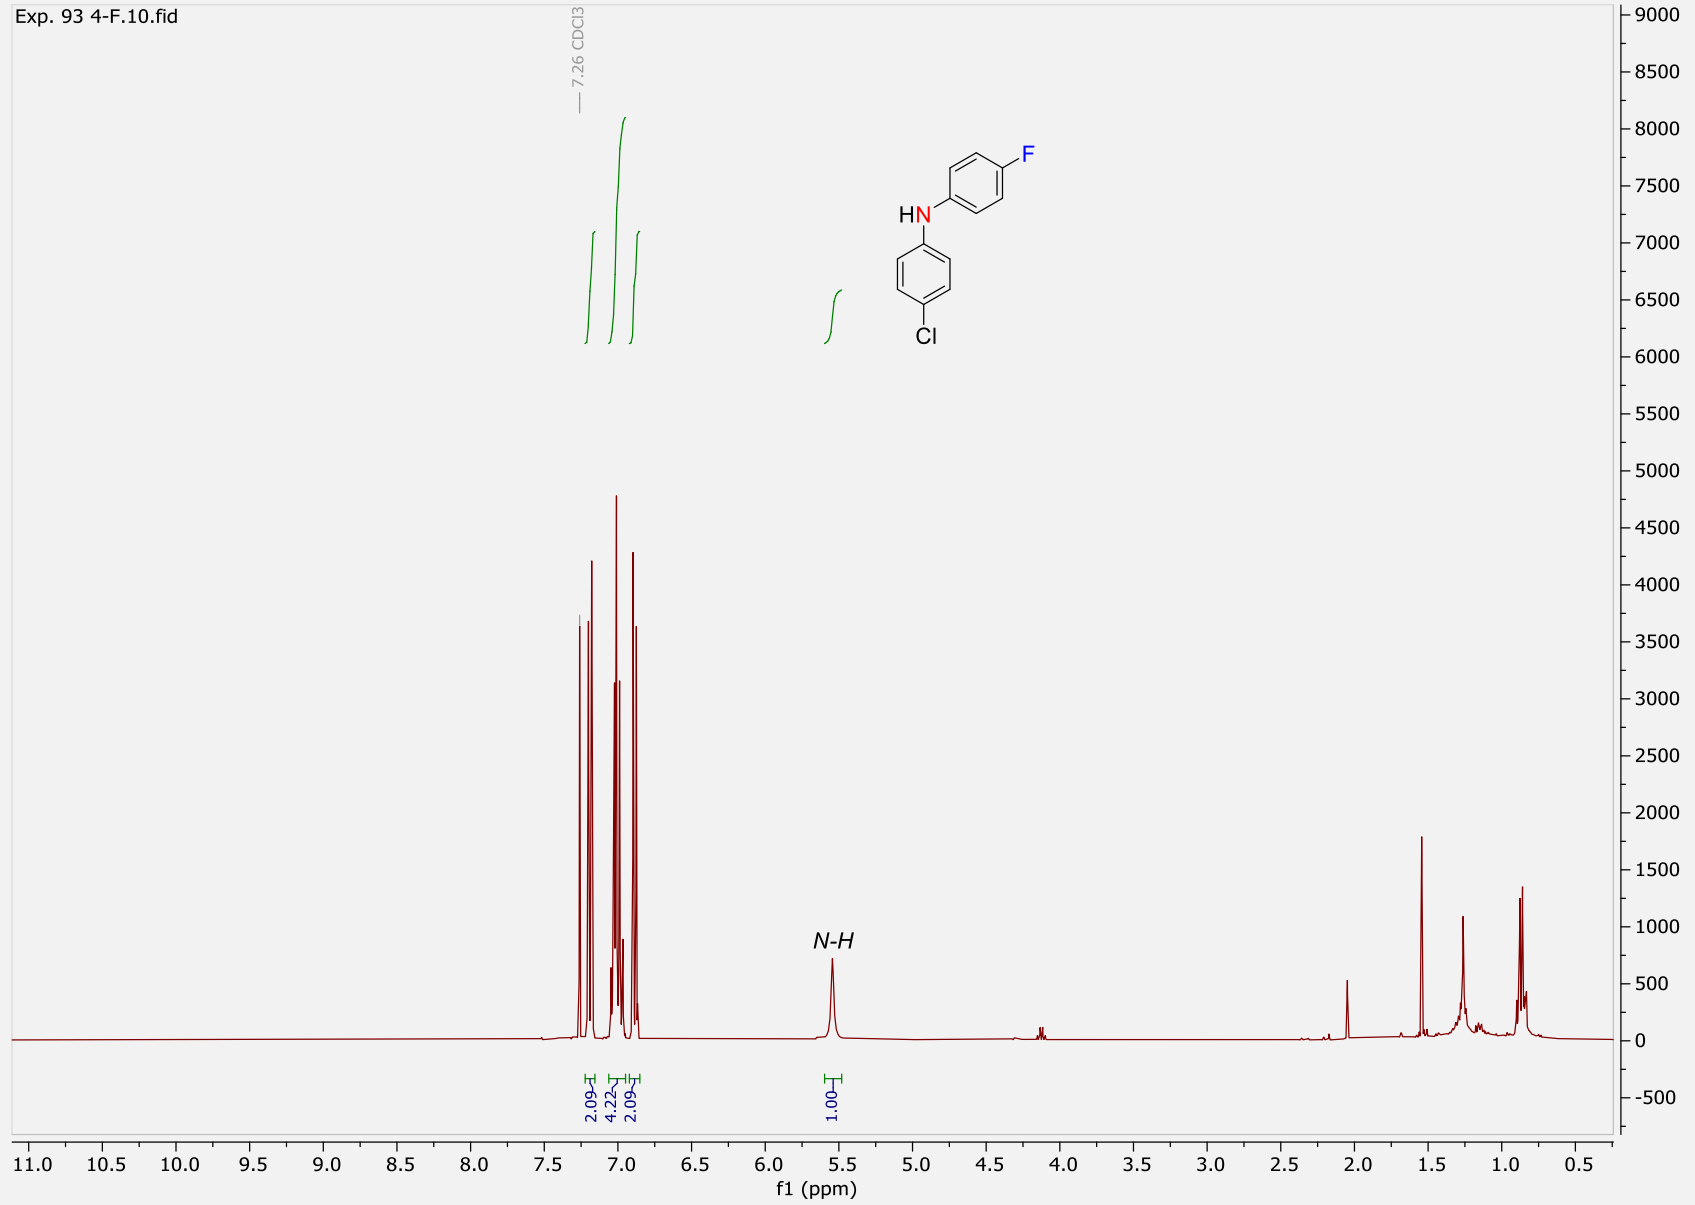

S57

Exp. 93 4-F.11.fid  
user Oluwarotimi Ojo  
C13CPD256.GLA CDCl3 /u oluwoj

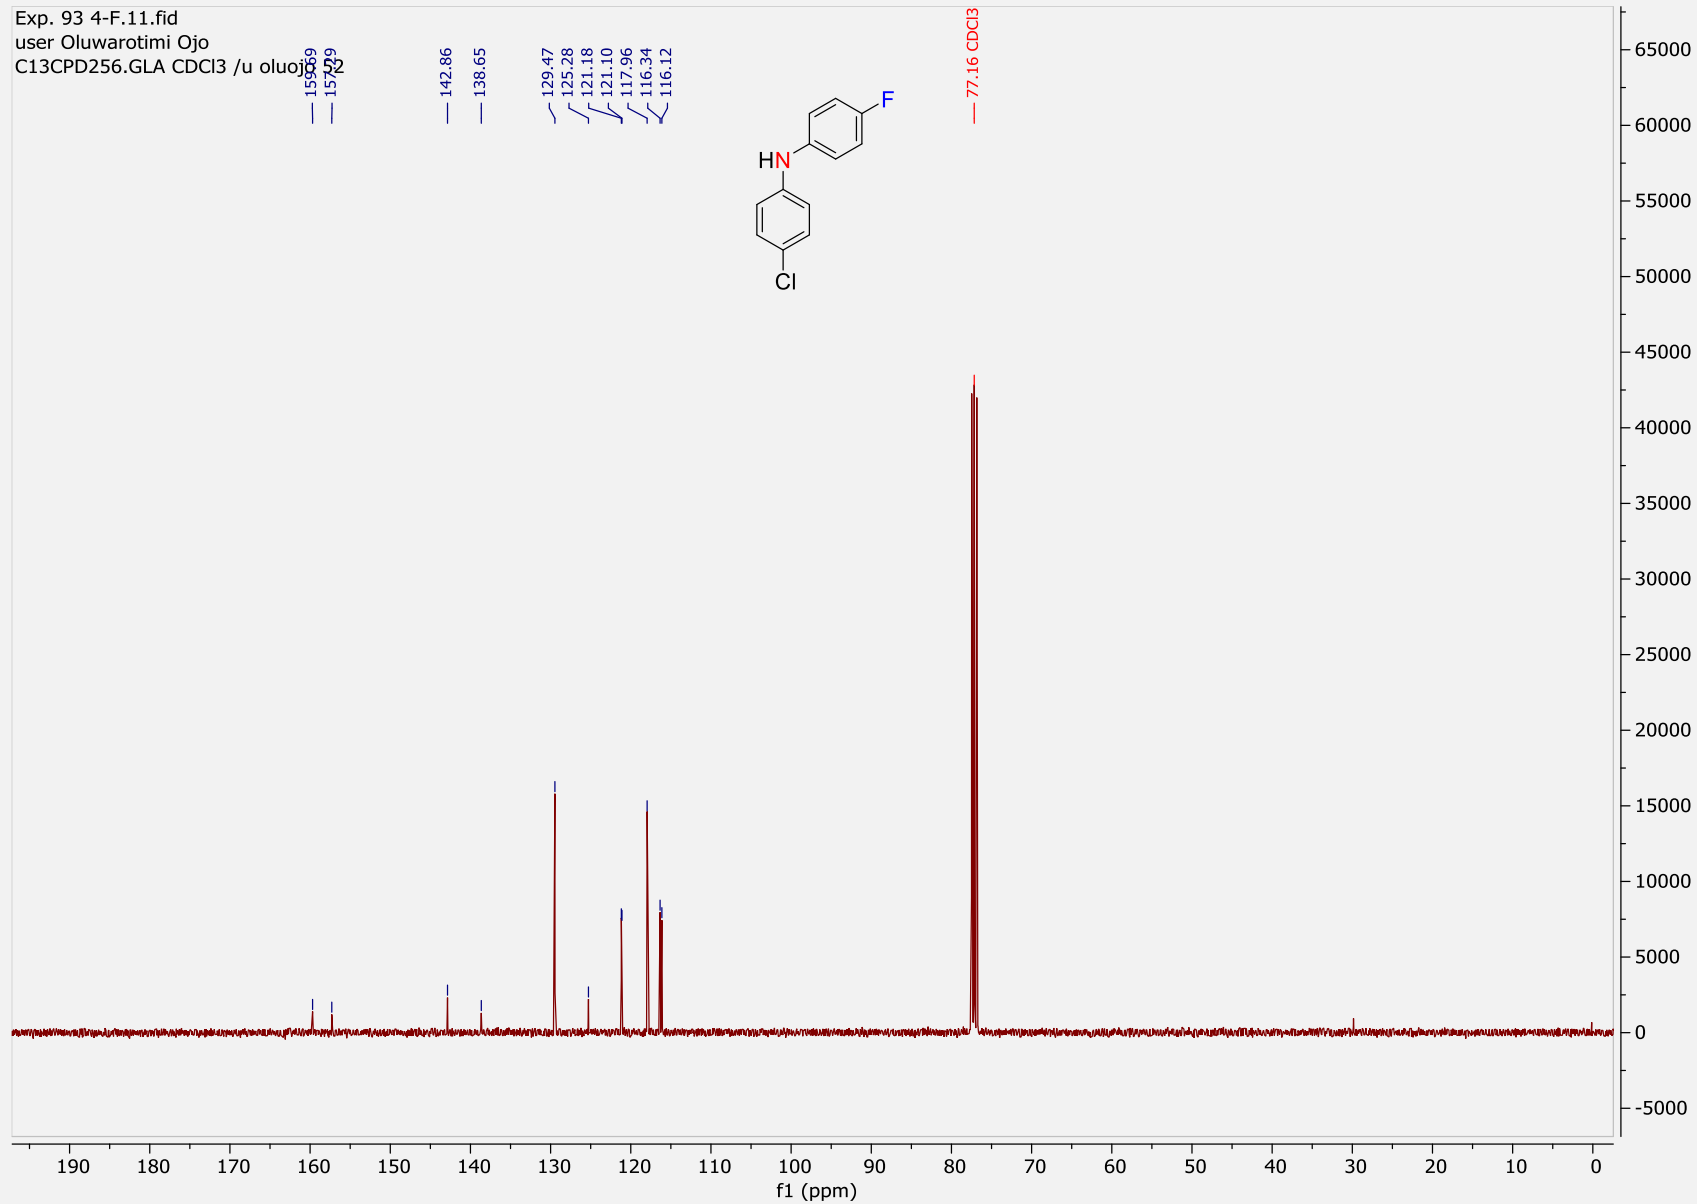

Exp. 93 4-F.10.fid  
user Oluwarotimi Ojo  
F19CPD.GLA CDCl3 /u olujo 52

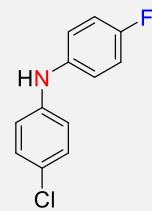

-121.17

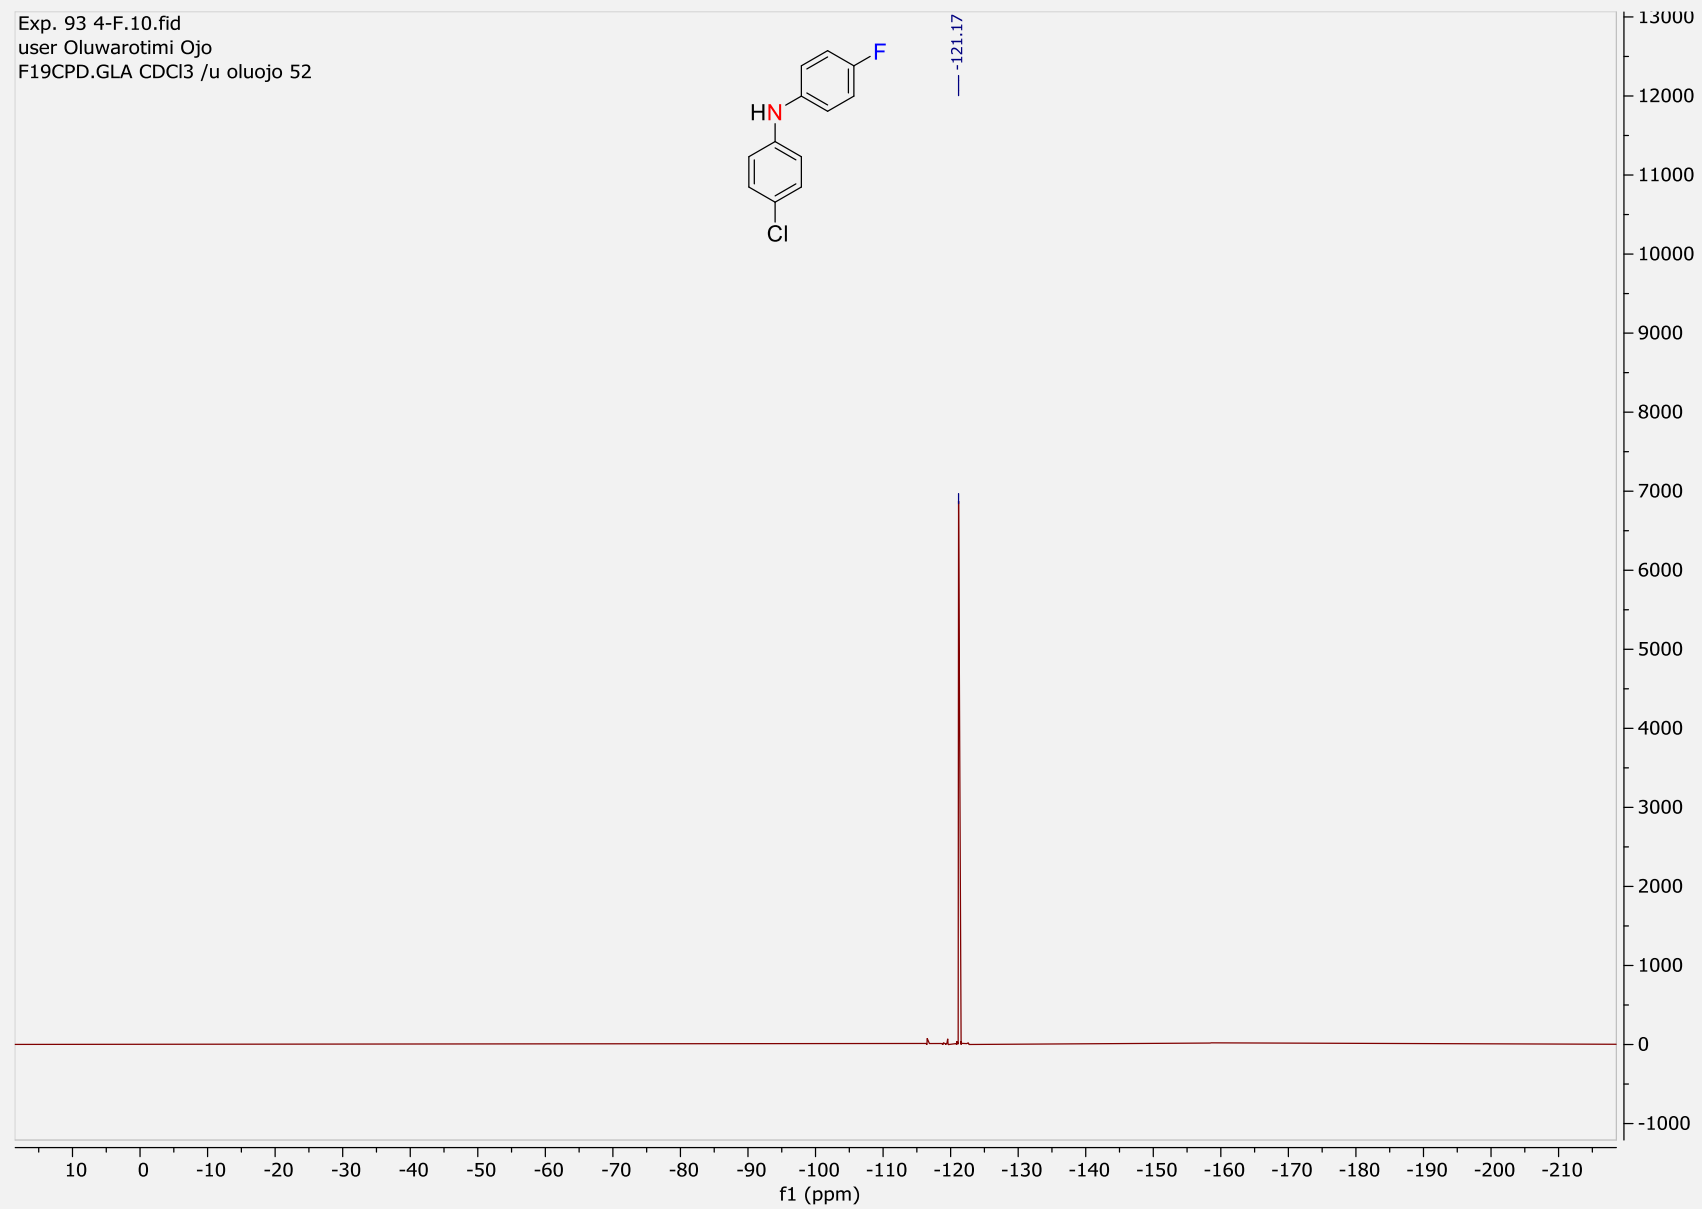

S59

Exp. 93 4-OMe.10.fid

7.26 CDCl3

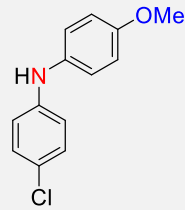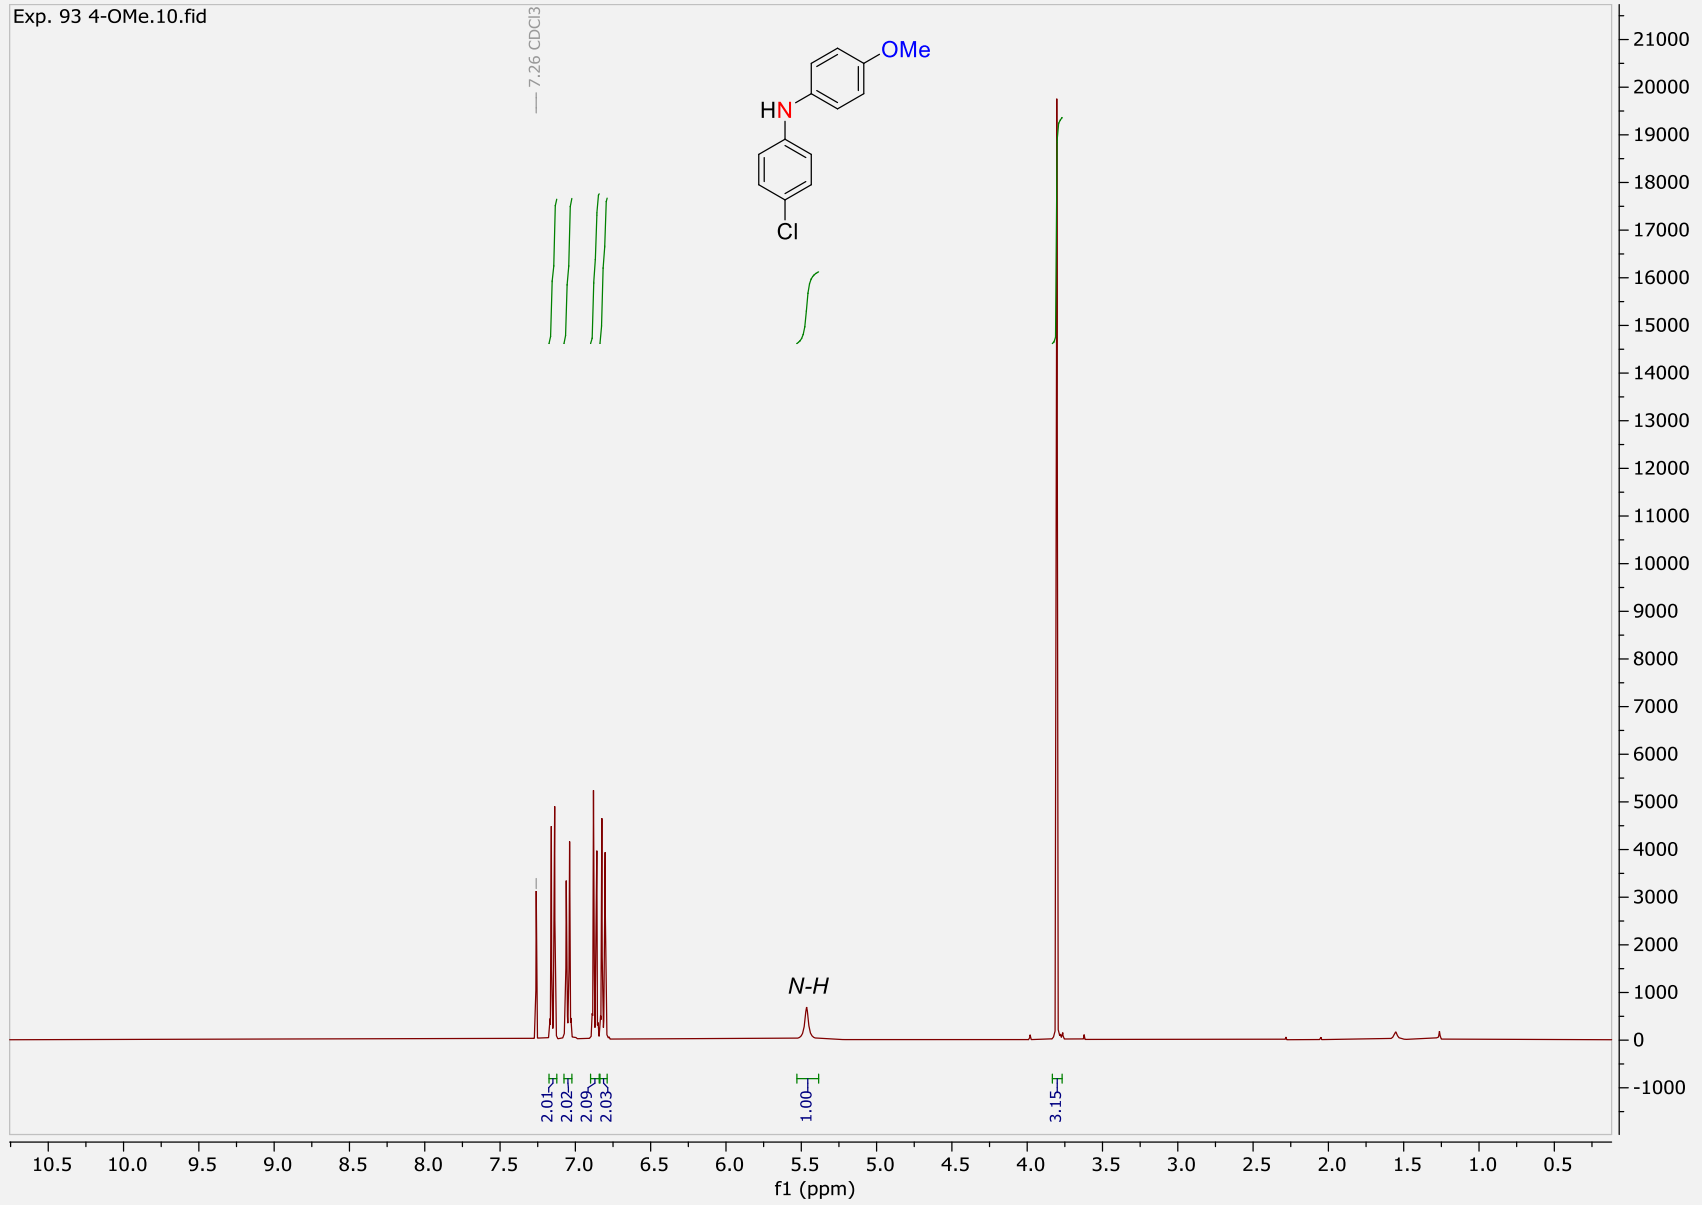

S60

Exp. 93 4-OMe.20.fid  
user Oluwarotimi Ojo  
C13CPD256.GLA CDCl3 /u oluojo 11

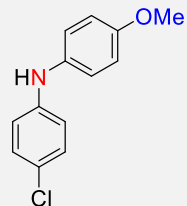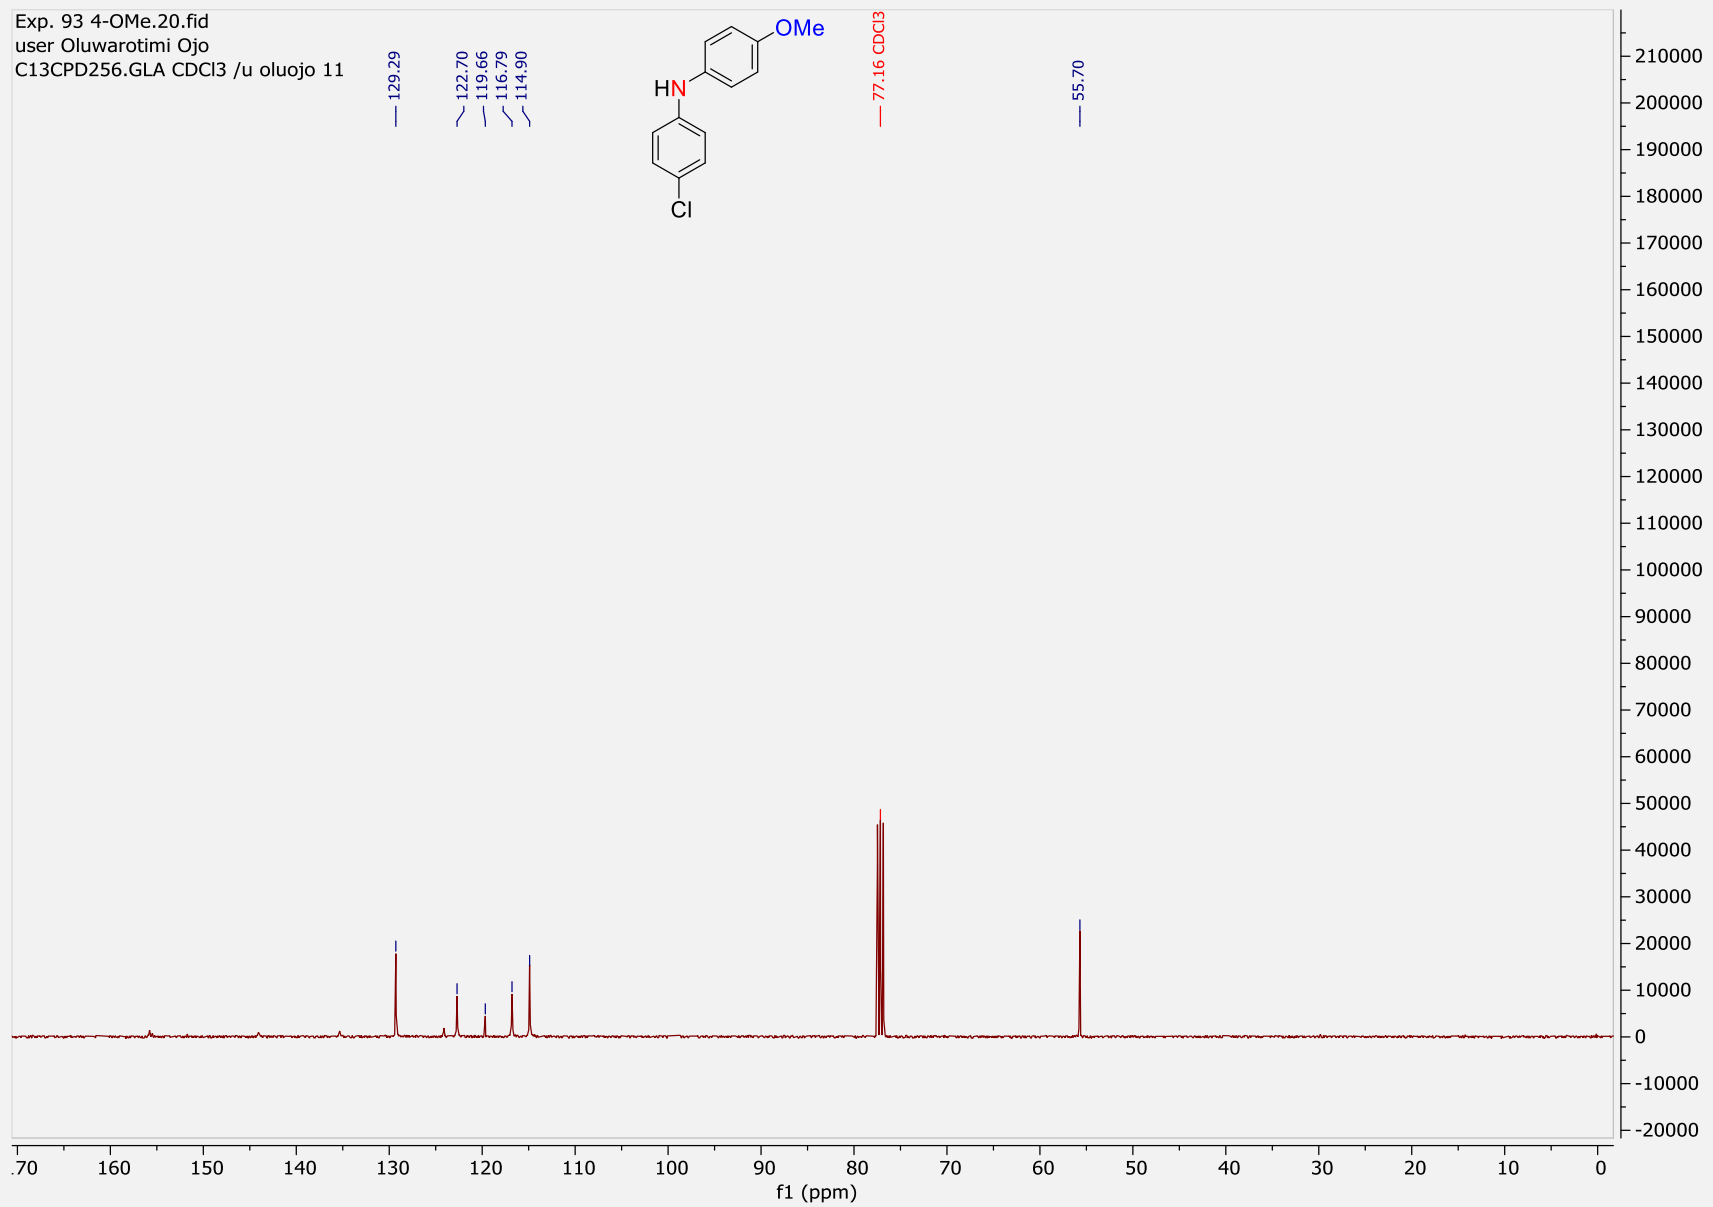

S61

Exp. 93 naphthyl.10.fid

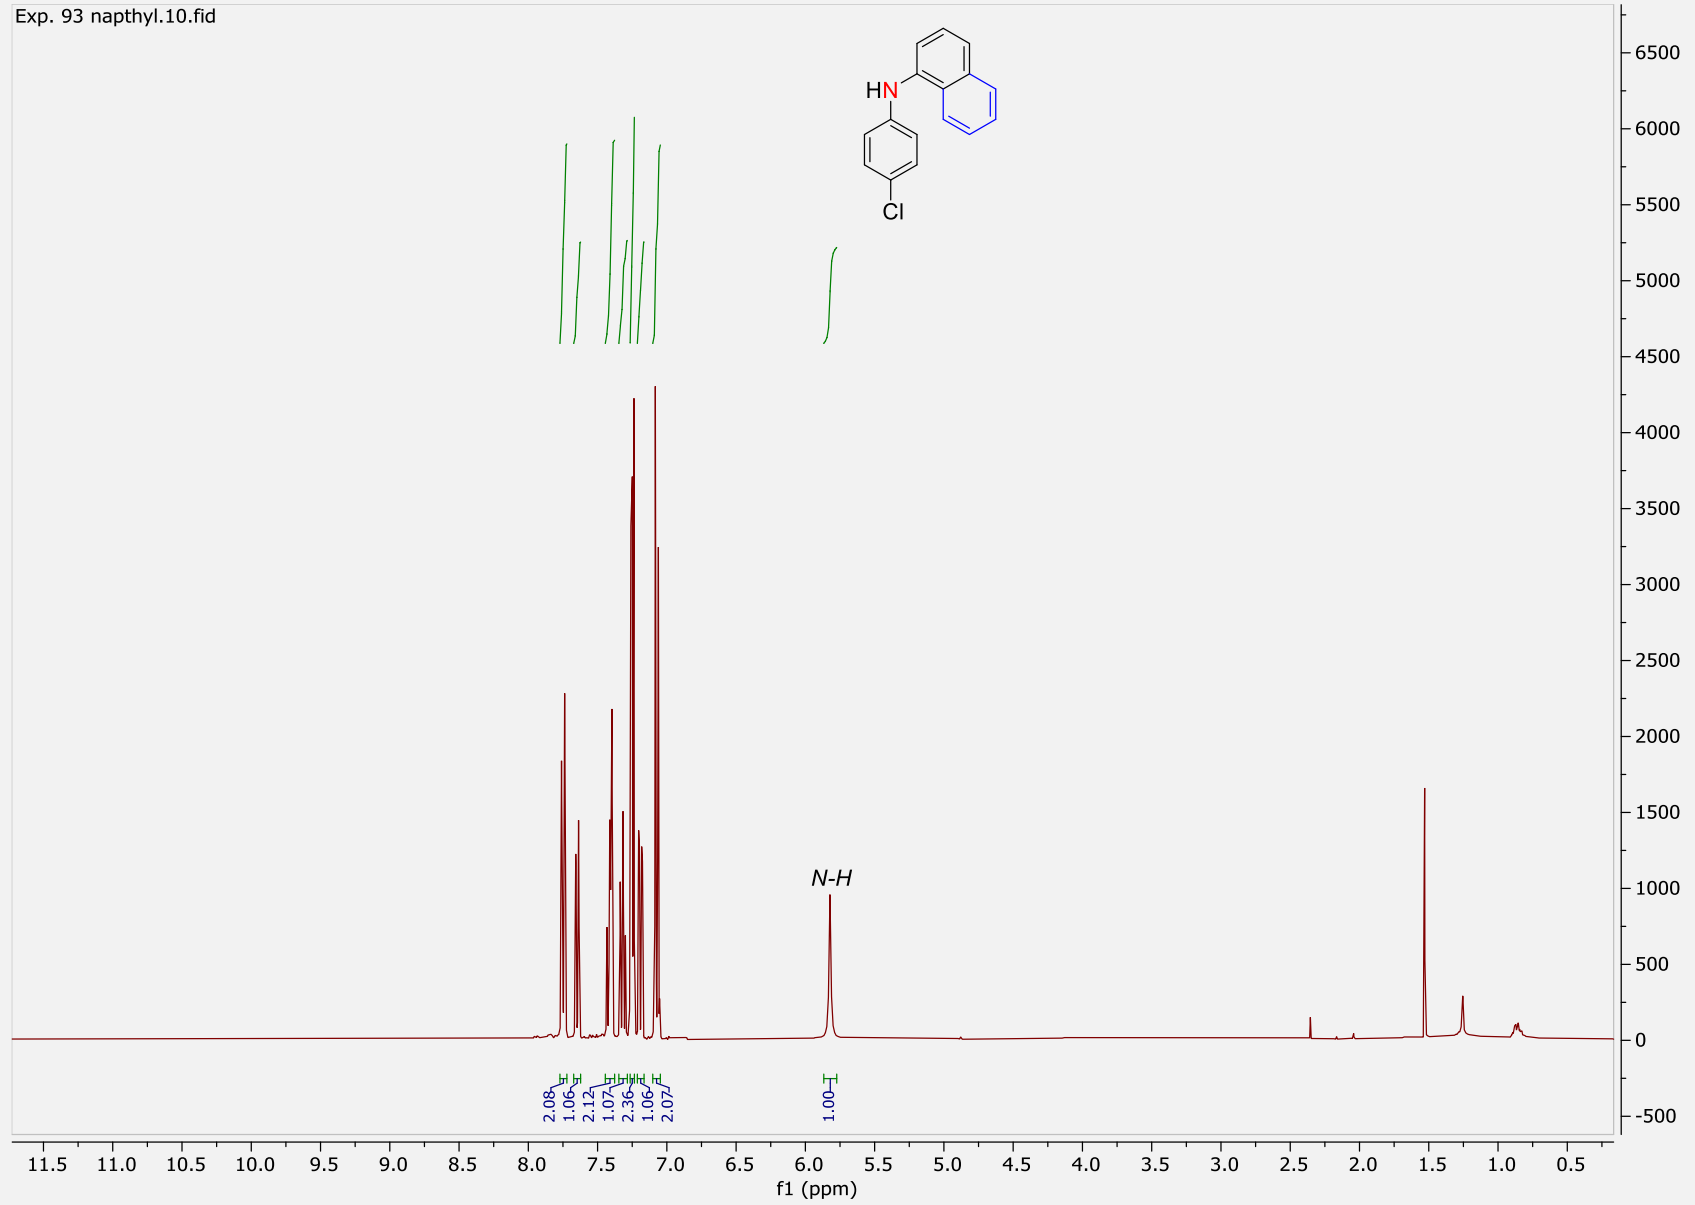

S62

Exp. 93 naphthyl.10.fid  
user Oluwarotimi Ojo  
C13CPD256.GLA CDCl3 /u oluajo 54

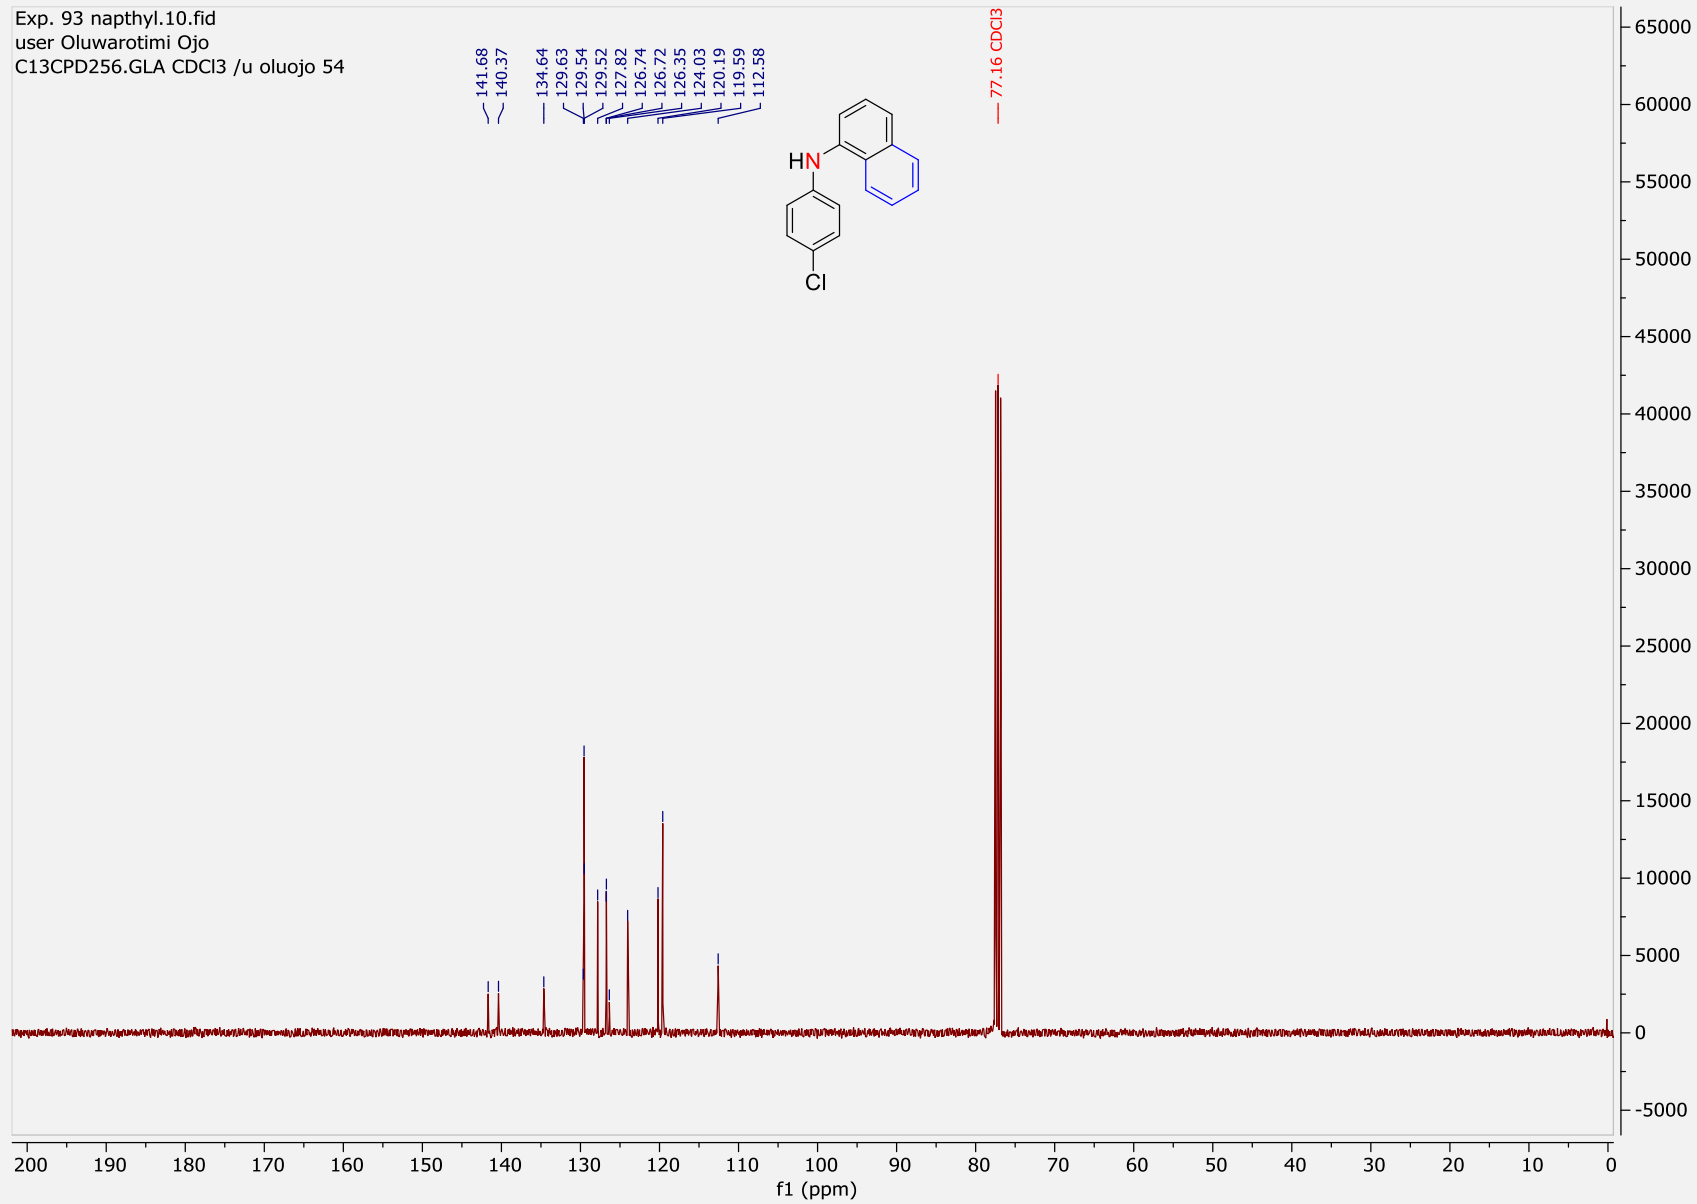

Supplement: d3dt02994h1.pdf [file d3dt02994h1.pdf]
